# Supplementary material for: Molecular and Metabolic Phenotyping of Hepatocellular Carcinoma for Biomarker Discovery: A Meta-Analysis
Source: Metabolites. 2023 Oct 27;13(11):1112. doi: 10.3390/metabo13111112 (PMC10672761; doi:10.3390/metabo13111112)
Supplement: Supplementary file 1 [file metabolites-13-01112-s001.zip › metabolites-2656922-supplementary.xlsx]

## Sheet: Table S1
Table S1. Demographic, study design, and analytical approach characteristics of the included studies.
No.	title	Authors	Year	Population	Cohort	Sample allocation (Biobank)	Prospective allocation	Fasting	Purpose	Paired samples	Matched samples	Gender bias	Type of cancer	Case group	Case size	Control group	Control size	Diagnosis/Staging system	Characteristics of the study population	Viral status (e.g., HBV, HCV)	Including all-stage samples?	Specimens	Metabolomics approach	Quantification	Platforms	Sample storage	Sample preparation	Internal standards	Compound identification	Analytical validation (QC)	Statistics	Validated method	p-value adjustment for multiple hypothesis testing	Sensitivity	Specificity	AUC	Accuracy	R2	Q2	Possible to extract p-value and adjusted p-value of reported biomarkers	Possible to extract fold changes of reported biomarkers	Note
109	Serum lipid alterations identified in chronic hepatitis B, hepatitis B virus-associated cirrhosis and carcinoma patients	Wu, T. and Zheng, X. and Yang, M. and Zhao, A. and Li, M. and Chen, T. and Panee, J. and Jia, W. and Ji, G.	2017	China	Single	No	No	Yes	Diagnosis	No	No	Yes (HCC)	HCC	Cancer	95	Cihrrosis	104	China National Guideline	Yes	Yes (HBV)	Yes	Serum	Targeted lipidomics	Yes	LC-MS	-80	Yes	Yes	Commercial kit	No (but part of the kit)	Univariate and multivariate analysis	Cross-validation	Yes	NA	NA	NA	NA	NA	NA	No	Calculated	Please check Figure 1, Table 2, Table 3, and Table 4
110	Serum lipid profiling of patients with chronic hepatitis B, cirrhosis, and hepatocellular carcinoma by ultra fast LC/IT-TOF MS	Chen, S. and Yin, P. and Zhao, X. and Xing, W. and Hu, C. and Zhou, L. and Xu, G.	2013	China	Single	No	No	Yes	Diagnosis	No	No	ND	HCC	Cancer	30	Cihrrosis	30	ND	No	Yes (HBV)	Yes	Serum	Untargeted lipidomics	Yes	LC-MS	-80	Yes	Yes	m/z, RT, and MS/MS	Yes	Univariate and multivariate analysis	Cross-validation	No	NA	NA	NA	NA	NA	NA	No	No (up-down)	NA
111	Serum lipidomic profiling as a useful tool for screening potential biomarkers of hepatitis B-related hepatocellular carcinoma by ultraperformance liquid chromatography-mass spectrometry	Passos-Castilho, A. M. and Carvalho, V. M. and Cardozo, K. H. M. and Kikuchi, L. and Chagas, A. L. and Gomes-Gouvêa, M. S. and Malta, F. and de Seixas-Santos Nastri, A. C. and Pinho, J. R. R. and Carrilho, F. J. and Granato, C. F. H.	2015	Brazil	Single (normal samples were from another place)	No	No	ND	Diagnosis	No	No	Yes	HCC	Cancer	32	Cihrrosis	30	Brazilian Society of Hepatology	Yes	Yes (HBV)	Yes	Serum	Untargeted lipidomics	No	LC-MS	-80	Yes	No	Public database	Yes	Univariate and multivariate analysis	Cross-validation	No	NA	NA	NA	NA	NA	NA	Maybe no	No (up-down)	Table 3 and Table 4 are important
113	The serum metabolic profiles of different Barcelona stages hepatocellular carcinoma associated with hepatitis B virus	Zhang, L. and Wu, G. Y. and Wu, Y. J. and Liu, S. Y.	2018	China	Single	No	No	Yes	Diagnosis	No	No	Yes	HCC	Cancer	75	Cihrrosis	20	Barcelona	Yes	Yes (HBV)	Yes	Serum	Untargeted metabolomics	No	LC-MS	-80	Yes	Yes	MS/MS, rtmz, authentic standard, public database	Yes	Univariate and multivariate analysis	Cross-validation	Yes	NA	NA	NA	NA	NA	NA	Maybe no	No (up and down)	This study mentioned the dietary requirements of the enrolled patients. Please check Table II. Also please consider if we can extract the biomarkers for the early stage only.
114	Serum Metabolic Profiling Study of Hepatocellular Carcinoma Infected with Hepatitis B or Hepatitis C Virus by Using Liquid Chromatography-Mass Spectrometry	Zhou, L. N. and Ding, L. L. and Yin, P. Y. and Lu, X. and Wang, X. M. and Niu, J. Q. and Gao, P. J. and Xu, G. W.	2012	China	Single	No	No	Yes	Diagnosis	No	No	Yes	HCC	Cancer	69	Cihrrosis	28	ND	Yes	Yes	Yes	Serum	Untargeted metabolomics and semi-targeted metabolomics	No	LC-MS	-80	Yes	Yes	ND	Yes	Univariate and multivariate analysis	External validation	No	NA	NA	NA	NA	NA	NA	Yes (not adjusted values)	Yes	Please check their table 2. They compared HCC HBV and HCC HCV.
114	The serum metabolic profiles of different Barcelona stages hepatocellular carcinoma associated with hepatitis B virus	Zhou, L. N. and Ding, L. L. and Yin, P. Y. and Lu, X. and Wang, X. M. and Niu, J. Q. and Gao, P. J. and Xu, G. W.	2012	China	Single	No	No	Yes	Diagnosis	No	No	Yes	HCC	Cancer	69	Cihrrosis	28	ND	Yes	Yes	Yes	Serum	Untargeted metabolomics and semi-targeted metabolomics	No	LC-MS	-80	Yes	Yes	ND	Yes	Univariate and multivariate analysis	External validation	No	NA	NA	NA	NA	NA	NA	Yes (not adjusted values)	Yes	Please check their table 2. They compared HCC HBV and HCC HCV.
119	Serum metabolomics reveals the deregulation of fatty acids metabolism in hepatocellular carcinoma and chronic liver diseases	Zhou, L. and Wang, Q. and Yin, P. and Xing, W. and Wu, Z. and Chen, S. and Lu, X. and Zhang, Y. and Lin, X. and Xu, G.	2012	China	Single	No	No	Yes	Diagnosis	No	Yes (age and sex)	Yes	HCC	Cancer	30	Cihrrosis	30	Biochemical and imaging criteria	Yes	Yes (HBV)	Yes	Serum	Untargeted metabolomics and targeted fatty acid analysis	No	LC-MS	-80	Yes	No	mzRT, MS/MS, public database and authentic standards	Yes	Univariate analysis and multivariate analysis	Cross-validation	No	NA	NA	NA	NA	NA	NA	Partially yes	Yes (compared with healthy controls)	Please check Table 2 and check if we can extract fold change for other comparisons
120	Serum Metabolomics to Identify the Liver Disease-Specific Biomarkers for the Progression of Hepatitis to Hepatocellular Carcinoma	Gao, R. and Cheng, J. and Fan, C. and Shi, X. and Cao, Y. and Sun, B. and Ding, H. and Hu, C. and Dong, F. and Yan, X.	2015	China	Single	No	No	Yes	Diagnosis	No	Yes (age and sex)	Yes	HCC	Cancer	39	Cihrrosis	52	Biochemical and imaging criteria	Yes	Yes (HBV)	Yes	Serum	Untargeted metabolomics	No	GC-MS	-80	Yes	Yes	Commercial database	Yes	Univariate analysis and multivariate analysis	External validation	No	NA	NA	NA	NA	NA	NA	No	No	Please manually extract the metabolites from Figure 2b
49	A Novel Biomarker Panel for the Early Detection and Risk Assessment of Hepatocellular Carcinoma in Patients with Cirrhosis	Khan et al.	2021	USA	Multiple	No	Yes	ND	Diagnosis/progression	No	No	No	HCC	Cancer	40	Cirrhosis	63	American Association for the Study of Liver Disease guidelines	Yes	Yes	NA	Serum	Untargeted lipidomics	No	GC-MS	ND	Yes	ND	ND	ND	Univariate and multivariate	ND	No	NA	NA	0.77	NA	NA	NA	No	No	Study provided AUC of three metabolites, highest one was input here
55	A Large-scale, multicenter serum metabolite biomarker identification study for the early detection of hepatocellular carcinoma	Luo, P. and Yin, P. and Hua, R. and Tan, Y. and Li, Z. and Qiu, G. and Yin, Z. and Xie, X. and Wang, X. and Chen, W. and Zhou, L. and Wang, X. and Li, Y. and Chen, H. and Gao, L. and Lu, X. and Wu, T. and Wang, H. and Niu, J. and Xu, G.	2017	China	Multiple-institution	Yes (partly)	Yes (partly)	Yes	Diagnosis	No	Yes	Yes	HCC	Cancer	558	Cirrhosis	310	American Association for the Study of Liver Diseases	Yes	Yes (mostly HBV)	Yes	Serum	Untargeted metabolomics and targeted metabolomics	Yes	LC-MS	-80	Yes	Yes	MS/MS, in-house library, authentic standards	Yes	Univariate and multivariate analysis, ROC analysis	External validation	No	NA	NA	NA	NA	NA	NA	Maybe no	Yes	Please take a look at their supplementary file.
63	LC/MS-Based Global Metabolomic Identification of Serum Biomarkers Differentiating Hepatocellular Carcinoma from Chronic Hepatitis B and Liver Cirrhosis	Hong Y. Pan, Qing Q. Wu, Qiao Q. Yin, Yi N. Dai, Yi C. Huang, Wei Zheng, Tian C. Hui, Mei J. Chen, Ming S. Wang, Jia J. Zhang, Hai J. Huang, and Yong X. Tong	2021	China	ND	No	No	ND	Diagnosis	No	No	Yes	HCC	Cancer	30	Cirrhosis	29	ND	Yes	comparison with HBV(no info about viral state of cancer group)	No	Serum	Untargeted metabolomics	Yes?	LC-MS	-80	Yes	No	m/z, RT, KEGG, HMDB, in-house fragment spectrum metabolite library, metaX	Yes	PCA, LOESS, Student's t test, Benjamini-Hochberg method, PLS-DA	External validation	Yes	NA	NA	0.747	NA	NA	NA	No	No	Multiple ROC data so picked the highest one
70	Metabolomic Characterization of Hepatocellular Carcinoma in Patients with Liver Cirrhosis for Biomarker Discovery	Di Poto, C. and Ferrarini, A. and Zhao, Y. and Varghese, R. S. and Tu, C. and Zuo, Y. and Wang, M. and Nezami Ranjbar, M. R. and Luo, Y. and Zhang, C. and Desai, C. S. and Shetty, K. and Tadesse, M. G. and Ressom, H. W.	2017	USA	Single	No	No	ND	Diagnosis	No	No	Yes	HCC	Cancer	63	Cirrhosis	65	TNM	Yes	Yes	Yes	Plasma	Untargeted metabolomics and targeted metabolomics	Yes	GC-MS	-80	Yes	Yes	MS, commercial database and authentic compounds	Yes	LASSO, logistic regression and SVM	Cross-validation	Yes	NA	NA	0.808-0.857	NA	NA	NA	Yes	Yes	Please extract the Table 2.
72	Analysis of plasma metabolic profile, characteristics and enzymes in the progression from chronic hepatitis B to hepatocellular carcinoma	Fei-Fei Cai, Ya-Nan Song, Yi-Yu Lu, Yongyu Zhang, Yi-Yang Hu, Shi-Bing Su	2020	China	Single	No	No	Yes(before breakfast)	Diagnosis/Prognosis	No	No	ND	HCC	Cancer	39	Cirrhosis	67	Chinese medicine clinical research guidelines” (third edition) : previous paper	Yes	Yes(HBV)	Yes	Plasma	Untargeted metabolomics	Yes?	GC-MS	-80	Yes	No	Identification of metabolites were carried out using the Agilent Mass hunter Workstation, To identify the differential metabolites, OPLS analysis was performed	No	ROC curve, PLS-DA, OPLS, VIP, Kruskal-Wallis test, Fisher's exact test	ND	Yes	NA	NA	0.8772	NA	NA	NA	No	No	L-serine, cystathionine, creatine and linoleic acid panel
77	Metabolomics Identifies Biomarker Pattern for Early Diagnosis of Hepatocellular Carcinoma: from Diethylnitrosamine Treated Rats to Patients	Zeng, J. and Huang, X. and Zhou, L. and Tan, Y. and Hu, C. and Wang, X. and Niu, J. and Wang, H. and Lin, X. and Yin, P.	2015	China	Multi-institution	Yes	ND	Yes	Diagnosis	No	No	Yes	HCC	Cancer	22	Cirrhosis	25	Pathologically confirmed	Yes	Yes	Yes	Serum	Targeted metabolomics	No	CE-MS	-80	Yes	Yes	ND	Yes	Univariate, multivariate analysis, ROC analysis	External validation	No	0.864	0.76	0.865	NA	NA	NA	Maybe no	Maybe no	It may be all about 5 candidates discovered from the animal experiment, especially the betaine and creatine.
77	Metabolomics Identifies Biomarker Pattern for Early Diagnosis of Hepatocellular Carcinoma: from Diethylnitrosamine Treated Rats to Patients	Zeng, J. and Huang, X. and Zhou, L. and Tan, Y. and Hu, C. and Wang, X. and Niu, J. and Wang, H. and Lin, X. and Yin, P.	2015	China	Multi-institution	Yes	ND	Yes	Diagnosis	No	No	Yes	HCC	Cancer including small HCC	50 (20-30)	Cirrhosis	25	Pathologically confirmed	Yes	Yes	Yes	Serum	Targeted metabolomics	No	CE-MS	-80	Yes	Yes	ND	Yes	Univariate, multivariate analysis, ROC analysis	External validation	No	0.905-0.928	0.760-0.800	2021-01-01	NA	NA	NA	Maybe no	Maybe no	It may be all about 5 candidates discovered from the animal experiment, especially the betaine and creatine.
79	Metabolomics study of hepatocellular carcinoma: discovery and validation of serum potential biomarkers by using capillary electrophoresis-mass spectrometry	Zeng, J. and Yin, P. and Tan, Y. and Dong, L. and Hu, C. and Huang, Q. and Lu, X. and Wang, H. and Xu, G.	2014	China	Single	Yes	ND	Yes	Diagnosis	No	Yes (age and gender)	No	HCC	Cancer	72	Cirrhosis	50	Pathologically confirmed	Yes	Yes	Yes	Serum	Untargeted metabolomics	No	CE-MS	-80	Yes	Yes	Commercial database and authentic standards	Yes	Univariate, multivariate analysis, ROC analysis	External validation	Yes	NA	NA	NA	NA	NA	NA	Yes	Yes	Focus on the Table S1. HCC vs Cirrhosis and HCC vs healthy. Put more attention to the Trp, Gln, Arg, 2-hydroxybutyric acid, and 3/4-methyl-2-oxovaleric acid
81	Metabonomic profiles discriminate hepatocellular carcinoma from liver cirrhosis by ultraperformance liquid chromatography-mass spectrometry	Wang, B. and Chen, D. and Chen, Y. and Hu, Z. and Cao, M. and Xie, Q. and Chen, Y. and Xu, J. and Zheng, S. and Li, L.	2012	China	Single	No	ND	Yes	Diagnosis	No	No	Yes	HCC	Cancer	82	Cirrhosis	48	Pathologically confirmed/AJCC	Yes	Yes (100% HBV)	Yes	Serum	Untargeted metabolomics	No	LC-MS	ND	Yes	ND	literature search, MS/MS, public database and authentic standards	Yes	Univariate, multivariate analysis, and ROC analysis	External validation	No	NA	NA	NA	NA	0.944	0.802	Maybe no	Should be calculated from Table 3	Focus on Table 3. Some manual calculation may be needed.
90	NMR and LC/MS-based global metabolomics to identify serum biomarkers differentiating hepatocellular carcinoma from liver cirrhosis	Liu, Y. and Hong, Z. and Tan, G. and Dong, X. and Yang, G. and Zhao, L. and Chen, X. and Zhu, Z. and Lou, Z. and Qian, B. and Zhang, G. and Chai, Y.	2014	China	Multi-institution	No	ND	ND	Diagnosis	No	No	Yes	HCC	Cancer	71	Cirrhosis	68	AJCC	Yes	Yes	Yes	Serum	Untargeted metabolomics	No	LC-MS and NMR	-80	Yes	Yes	MS/MS, public database, and authentic standards	Yes	Multivariate analysis	External validation	No	NA	NA	NA	NA	NA	NA	Yes	Manually calculated	Please check their tables (one for NMR and one for LC-MS, it may be overlapped).
95	Phospholipid profiles and hepatocellular carcinoma risk and prognosis in cirrhotic patients	Cotte, A. K. and Cottet, V. and Aires, V. and Mouillot, T. and Rizk, M. and Vinault, S. and Binquet, C. and de Barros, J. P. and Hillon, P. and Delmas, D.	2019	France	Multi-institution	No	Yes	ND	Diagnosis (and risk prediction and prognosis)	No	Yes	Yes	HCC	Cancer	45	Cirrhosis	45	EASL	Yes	Yes	Yes	Plasma	Targeted lipidomics	Yes	LC-MS	-80	Yes	Yes	MS/MS	No	Univariate and multivariate analysis	NA	No	NA	NA	NA	NA	NA	NA	Yes	Manually calculated	Please check Table 3.
128	Tissue and serum metabolite profiling reveals potential biomarkers of human hepatocellular carcinoma	Han, J. and Qin, W. X. and Li, Z. L. and Xu, A. J. and Xing, H. and Wu, H. and Zhang, H. and Wang, M. D. and Li, C. and Liang, L. and Quan, B. and Yan, W. T. and Shen, F. and Wu, M. C. and Yang, T.	2019	China	Single	No	No	ND	Diagnosis	No	No	Yes	HCC	Cancer	30	Cirrhosis	30	Histologically confirmed	Yes	Yes (mostly HBV)	Yes	Serum	Untargeted metabolomics	No	LC-MS	-80	Yes	Yes	Public database and authentic standards	Yes	Univariate analysis and multivariate analysis	Cross-validation	No	NA	NA	NA	NA	NA	NA	Check supplementary Table S1	Check supplementary Table S1	Please focus on Supplementary Table S2
76	Metabolomics and eicosanoid analysis identified serum biomarkers for distinguishing hepatocellular carcinoma from hepatitis B virus-related cirrhosis	Gong, Z. G. and Zhao, W. and Zhang, J. and Wu, X. and Hu, J. and Yin, G. C. and Xu, Y. J.	2017	China	Single	No	ND	Yes	Diagnosis	No	No	Yes (HCC group)	HCC	Cancer	51	Cirrhosis (100% HBV)	49	ND	Yes	Yes	No	Serum	Untargeted metabolomics and targeted eicosanoid analysis	No	GC-MS and LC-MS	-80	Yes	Yes	Commercial database and public database	Yes	Univariate, multivariate analysis	Cross-validation	No	NA	NA	0.784-0.833	NA	NA	NA	Maybe yes	Maybe no	Please check the supplementary file for detailed information. Extract both metabolites and eicosanoids
83	A metabonomic study of hepatitis B-induced liver cirrhosis and hepatocellular carcinoma by using RP-LC and HILIC coupled with mass spectrometry	Yin, P. and Wan, D. and Zhao, C. and Chen, J. and Zhao, X. and Wang, W. and Lu, X. and Yang, S. and Gu, J. and Xu, G.	2009	China	Single	No	ND	ND	Diagnosis	No	Yes (age and gender)	ND	HCC	Cancer	24	Cirrhosis (100% HBV)	25	Pathologically confirmed	No	No	Yes	Serum	Untargeted metabolomics	No	LC-MS	-80	Yes	Yes	MS/MS, public database, and authentic standards	Yes	OPLS	Cross-validation	No	NA	NA	NA	NA	0.892	0.636	No	Should be calculated from Table 2 (fold-change)	Fold change is given is not standardized, some calculations are needed.
64	Establishment of a pattern recognition metabolomics model for the diagnosis of hepatocellular carcinoma	Peng-Cheng Zhou, Lun-Quan Sun, Li Shao, Lun-Zhao Yi, Ning Li, Xue-Gong Fan	2020	China	Single?	No?	No	Yes	Diagnosis	No	Yes	Yes(it seems yes, but the paper says there are no significant differences in sex)	HCC	Cancer	30	Cirrhosis	29	HCC diagnosis criteria set by the Ministy of Health, Chinese HCC staging system	Yes	Yes(mostly HBV)	Yes	Serum	Untargeted metabolomics	Yes?	LC-MS	-80	Yes	Yes	Authentic standards, m/z, mzRT	Yes	PCA, PLS-DA, OPLS-DA, Kreksal-Wallis test, Linear discriminant analysis, ROC, AUC	Cross-validation	Yes	1	0.6	0.84	0.7895	0.139	0.103	No	No	Prediction model of biomarker panel
45	Serum metabolomics reveals <U+03B3>-glutamyl dipeptides as biomarkers for discrimination among different forms of liver disease	Soga et al.	2011	Japan	Multiple (three institutes)	No	Yes	ND	Diagnosis	No	No	Yes	HCC	Cancer	32	Cirrhosis/HCV	18	Imaging and/or pathologically confirmed	yes	yes	ND	Serum	Targeted metabolomics	Yes	CE-MS and LC-MS	-80	Yes	Yes	Authentic standards	ND	Univariate and multivariate	External validation	ND	NA	NA	NA	NA	NA	NA	Yes	Yes	No individual AUV data for each single biomarker, the study build model discriminating one condition from all other diseases
127	Targeted metabolic profiling of hepatocellular carcinoma and hepatitis C using LC-MS/MS	Baniasadi, H. and Gowda, G. A. N. and Gu, H. W. and Zeng, A. and Zhuang, S. and Skill, N. and Maluccio, M. and Raftery, D.	2013	USA	Multiple institution	Yes	No	Yes	Diagnosis	No	No	Yes (HCC)	HCC	Cancer	30	Cirrhosis-HCV	22	Histologically confirmed	Yes	Yes (HCV)	Yes	Serum	Targeted metabolomics	Yes	LC-MS	-70	Yes	Yes	NA	Yes	Univariate analysis and multivariate analysis	Cross-validation	No	NA	NA	NA	NA	NA	NA	Yes	Yes	Please focus on Table 2.
3	Utilization of metabolomics to identify serum biomarkers for hepatocellular carcinoma in patients with liver cirrhosis	Ressom et al.	2012	USA	Single	No	No	ND	Diagnosis	No	No	Yes (HCC)	HCC	Cancer	78	Cirrohsis	184	Imaging and/or pathologically confirmed	Yes	Yes (mostly HCV)	Yes	Serum	Untargeted metabolomics	Yes	LC-MS	-80	Yes	Yes	Public database and authentic standards	Technical replicate and heterogenous QC (mixed samples NOT from the samples under investigation)	t-test and Wilcoxon rank-sum test	ND	Yes	NA	NA	NA	NA	NA	NA	Yes (p-value and q-value)	Yes, from # MTBLS17	NA
4	Aberrant lipid metabolism in hepatocellular carcinoma revealed by plasma metabolomics and lipid profiling	Patterson, A. D. and Maurhofer, O. and Beyoglu, D. and Lanz, C. and Krausz, K. W. and Pabst, T. and Gonzalez, F. J. and Dufour, J. F. and Idle, J. R.	2011	USA/Switzerland	Single	No	No	ND	Diagnosis	No	No	Yes (HCC)	HCC	Cancer	20	Cirrohsis	7	European Association for the Study of the Liver (EASL)	Yes	Yes	Yes	Plasma/Serum	Untargeted and targeted lipidomics	Yes	LC-MS and GC-MS	-80	Yes	Yes	TandemMS, Standard, and MS	ND	PCA, PLS-DA, and Random Forest	ND	No	NA	NA	NA	0.963	NA	NA	No	Yes	It seems that the word "serum" was wrongly mentioned. They only used plasma.
19	Classification and differential metabolite discovery of liver diseases based on plasma metabolic profiling and support vector machines	Lin, X. H. and Zhang, Y. and Ye, G. Z. and Li, X. and Yin, P. Y. and Ruan, Q. and Xu, G. W.	2011	China	Single	No	No	ND	Diagnosis	No	No	ND	HCC	Cancer	28	Cirrohsis	28	Radiologically confirmed	No	Yes	Yes	Plasma	Untargeted metabolomics	No	GC-MS	-80	Yes	Yes	Commercial database	Yes	T-test, ANOVA/SVM for feature selection	Cross-validation	No	NA	NA	NA	0.7368	NA	NA	Yes	Partially yes	Only care of the pairs that have HCC. The accuracy seems to be from the discriminant analysis among three groups
21	Comparison of hepatic and serum lipid signatures in hepatocellular carcinoma patients leads to the discovery of diagnostic and prognostic biomarkers	Lu, Y. and Chen, J. and Huang, C. and Li, N. and Zou, L. and Chia, S. E. and Chen, S. and Yu, K. and Ling, Q. and Cheng, Q. and Zhu, M. and Zhang, W. and Chen, M. and Ong, C. N.	2018	China	Multi-institution	No	No	Yes	Diagnosis	Yes	No	No	HCC	Cancer	18	Cirrohsis	20	TNM	Yes	Yes	Yes	Serum	Untargeted lipidomics	No	LC-MS	-80	Yes	Yes	MS/MS and public database	Yes	T-test, PCA, and PLS-DA	External validation	Yes	0.62	0.71	0.772	NA	NA	NA	Maybe no (check supp files)	No	Lots of info can be extracted from the supplementary file. Adding the AFP level will improve the modeling. This study demonstrates our scoring system is correct. Indeed, the hepatic and serum lipid changes of HCC are "rather difference and independent".
30	Differential diagnosis between hepatocellular carcinoma and cirrhosis by serum amino acids and acylcarnitines	Zhang, Y. and Ding, N. and Cao, Y. F. and Zhu, Z. T. and Gao, P.	2018	China	ND	Yes	No	Yes	Diagnosis	No	Yes	Yes	HCC	Cancer	50	Cirrohsis	136	ND	No	ND	Yes	Blood	Targeted metabolomics	Yes	LC-MS	4	Yes	Yes	Authentic standard	ND	t-test, PLS-DA, logistic regression	External validation	No	0.875	0.881	0.947	NA	NA	NA	Yes	No	Please check if ref 17 and 18 are helpful.
37	Evaluation of Metabolite Biomarkers for Hepatocellular Carcinoma through Stratified Analysis by Gender, Race, and Alcoholic Cirrhosis	Xiao, J. F. and Zhao, Y. and Varghese, R. S. and Zhou, B. and Di Poto, C. and Zhang, L. H. and Tadesse, M. G. and Ziada, D. H. and Shetty, K. and Ressom, H. W.	2014	USA	Single	No	No	ND	Diagnosis	No	No	Yes	HCC	Cancer	56	Cirrohsis	54	TNM	No	NA	Yes	Serum	Targeted metabolomics	Yes	LC-MS	-80	Yes	Yes	Authentic standards	Yes	Logistic regression	Cross-validation	NA	NA	NA	NA	NA	NA	NA	Maybe yes (supp file)	Maybe yes (supp file)	This study was basically the duplicated study using two cohort and show the similarity between two cohorts. We can take this into account later.
37	Evaluation of Metabolite Biomarkers for Hepatocellular Carcinoma through Stratified Analysis by Gender, Race, and Alcoholic Cirrhosis	Xiao, J. F. and Zhao, Y. and Varghese, R. S. and Zhou, B. and Di Poto, C. and Zhang, L. H. and Tadesse, M. G. and Ziada, D. H. and Shetty, K. and Ressom, H. W.	2014	Egypt	Single	No	No	ND	Diagnosis	No	No	Yes	HCC	Cancer	40	Cirrohsis	49	TNM	Yes	Yes	Yes	Serum	Targeted metabolomics	Yes	LC-MS	-80	Yes	Yes	Authentic standards	Yes	Logistic regression	Cross-validation	NA	NA	NA	NA	NA	NA	NA	Maybe yes (supp file)	Maybe yes (supp file)	This study was basically the duplicated study using two cohort and show the similarity between two cohorts. We can take this into account later.
39	GC-MS Based Plasma Metabolomics for Identification of Candidate Biomarkers for Hepatocellular Carcinoma in Egyptian Cohort	Nezami Ranjbar, M. R. and Luo, Y. and Di Poto, C. and Varghese, R. S. and Ferrarini, A. and Zhang, C. and Sarhan, N. I. and Soliman, H. and Tadesse, M. G. and Ziada, D. H. and Roy, R. and Ressom, H. W.	2015	Egypt	Single	No	No	ND	Diagnosis	No	No	Yes	HCC	Cancer	40	Cirrohsis	49	ND	Yes	Yes	Yes	Plasma	Untargeted and targeted metabolomics	No	GC-MS	-80	Yes	Yes	Commercial database	Yes	ANOVA, PLS-DA	ND	Yes	NA	NA	NA	NA	NA	NA	Yes	Yes	Focus on the metabolites that were detected by both platforms
52	Integrated metabolomic profiling of hepatocellular carcinoma in hepatitis C cirrhosis through GC/MS and UPLC/MS-MS	Fitian, A. I. and Nelson, D. R. and Liu, C. and Xu, Y. and Ararat, M. and Cabrera, R.	2014	USA	Single	No	No	Yes	Diagnosis	No	Yes	Yes	HCC	Cancer	30	Cirrohsis	27	Barcelona	Yes	Yes (100% HCV)	Yes	Serum	Untargeted metabolomcis	No	LC-MS and GC-MS	-80	Yes	Yes	MS/MS, authentic standard	Yes	Univariate, multivariate, and ROC analysis	Cross-validation	Yes	NA	NA	NA	0.72	NA	NA	Yes	yes	Table 2. Cancer and cirrohsis only. Dicarboxylic acid metabolism, bile acid metabolism, fibrinogen cleavage peptides may be associated with HCC (results from serum)
137	Comprehensive Metabolomic Search for Biomarkers to Differentiate Early Stage Hepatocellular Carcinoma from Cirrhosis	Kim DJ, Cho EJ, Yu KS, Jang IJ, Yoon JH, Park T, Cho JY	2019	Korea	Single	Yes	Yes	Yes	Diagnosis	No	Yes	Yes (not statistically significant)	HCC	Cancer	135	Cirrohsis	127	BCLC	Yes	Yes (mainly HBV)	No	Serum	Untargeted and targeted metabolomics	Yes	GC-MS and LC-MS	-80	Yes	Yes	Commercial kits	ND	Univariate and multivariate analysis	External validation	Yes	NA	NA	NA	NA	NA	NA	Yes	Yes (calculate from Table S2)	Please check Supplementary Table S2 and Table S3
46	Identification of race-associated metabolite biomarkers for hepatocellular carcinoma in patients with liver cirrhosis and hepatitis C virus infection	Di Poto, C. and He, S. S. and Varghese, R. S. and Zhao, Y. and Ferrarini, A. and Su, S. and Karabala, A. and Redi, M. and Mamo, H. and Rangnekar, A. S. and Fishbein, T. M. and Kroemer, A. H. and Tadesse, M. G. and Roy, R. and Sherif, Z. A. and Kumar, D. and Ressom, H. W.	2018	USA	Single	No	No	ND	Diagnosis	No	No	Yes	HCC	Cancer	11	Cirrohsis/HCV	7	TNM	No	Yes	Yes	Plasma	Targeted metabolomics	No	GC-MS	-80	Yes	Yes	NA	Yes	Univariate and multivariate analysis	Cross-validation	NA	NA	NA	1	NA	NA	NA	Yes	Yes	African American. We will just extract individual race, not the mixed analysis. Thus, The results from AA and EA will be considered as separated studies. Pay attention to Table 3 and Supp file.
46	Identification of race-associated metabolite biomarkers for hepatocellular carcinoma in patients with liver cirrhosis and hepatitis C virus infection	Di Poto, C. and He, S. S. and Varghese, R. S. and Zhao, Y. and Ferrarini, A. and Su, S. and Karabala, A. and Redi, M. and Mamo, H. and Rangnekar, A. S. and Fishbein, T. M. and Kroemer, A. H. and Tadesse, M. G. and Roy, R. and Sherif, Z. A. and Kumar, D. and Ressom, H. W.	2018	USA	Single	No	No	ND	Diagnosis	No	No	Yes	HCC	Cancer	10	Cirrohsis/HCV	13	TNM	No	Yes	Yes	Plasma	Targeted metabolomics	No	GC-MS	-80	Yes	Yes	NA	Yes	Univariate and multivariate analysis	Cross-validation	NA	NA	NA	1	NA	NA	NA	Yes	Yes	Europian American. We will just extract individual race, not the mixed analysis. Thus, The results from AA and EA will be considered as separated studies. Pay attention to Table 3 and Supp file.
1	Clinical significance of small molecule metabolites in the blood of patients with different types of liver injury	Li et al.	2021	China	Single	No	Yes	Yes	Diagnosis	No	No	ND	HCC	Cancer	46	HBV-cirrhosis	75	ND	Yes	Yes	NA	Serum	Targeted lipidomics/metabolomics		LC-MS	-80	Yes	Yes	Authentic standards	ND	Univariate and multivariate analysis	ND	No	88.9	70.6	0.815	NA	NA	NA	Yes	Yes (table 3)	Study provided AUC of three metabolites, highest one was input here
40	Profiling of plasma metabolomics in patients with hepatitis C-related liver cirrhosis and hepatocellular carcinoma	Nomair et al.	2019	Egypt	Single	No	Yes	Yes	Diagnosis	No	No	No	HCC	Cancer	22	HCV-cirrhosis	22	Barcelona	Yes	Yes	Yes	Plasma	Untargeted metabolomics		GC-MS	-80	Yes	ND	mz/z, MSMS, NIST	ND	Univariate and multivariate analysis		No	100	100	100	NA	NA	NA	Yes	Yes (table 3)	Study provided AUC of three metabolites, highest one was input here
1	Clinical significance of small molecule metabolites in the blood of patients with different types of liver injury	Li et al.	2021	China	Single	No	Yes	Yes	Diagnosis	No	No	ND	HCC	Cancer	46	Healthy control	58	ND	Yes	Yes	NA	Serum	Targeted lipidomics/metabolomics		LC-MS	-80	Yes	Yes	Authentic standards	ND	Univariate and multivariate analysis	ND	No	88.4	83.3	0.943	NA	NA	NA	Yes	Yes (table 3)	Study provided AUC of three metabolites, highest one was input here
42	Quantification of serum purine metabolites for distinguishing patients with hepatitis B from hepatocellular carcinoma	Zhang et al.	2019	China	Single	No	Yes	ND	Diagnosis	No	No	No	HBV-related HCC	Cancer	35	Healthy control	30	Clinical pathology	Yes	Yes	ND	Serum	Targeted metabolomics	Yes	LC-MS	-80	Yes	Yes	Authentic standard	Yes	Univariate and multivariate analysis	ND	No	NA	NA	0.885	NA	NA	NA	No	Yes (table 4)	Table 4 contained individual AUROC of each biomarker
43	A support vector machine-recursive feature elimination feature selection method based on artificial contrast variables and mutual information	Lin et al.	2012	China	Single	No	Yes	Yes	Diagnosis	No	Yes	No	HCC	Cancer	30	Healthy control	30	ND	No	ND	ND	Serum	Untargeted metabolomics	No	LC-MS	-80	Yes	ND	database of Metlin, HMDB) cf.reference29	Yes	Univariate and multivariate analysis	Cross-validation	ND	NA	NA	NA	NA	NA	NA	No	Yes (table 3)	This study is about developing feature selection method
45	Serum metabolomics reveals <U+03B3>-glutamyl dipeptides as biomarkers for discrimination among different forms of liver disease	Soga et al.	2011	Japan	Multiple (three institutes)	No	Yes	ND	Diagnosis	No	No	Yes	HCC	Cancer	32	Healthy control	57	Imaging and/or pathologically confirmed	yes	yes	ND	Serum	Targeted metabolomics	Yes	CE-MS and LC-MS	-80	Yes	Yes	Authentic standards	ND	Univariate and multivariate	External validation	ND	NA	NA	NA	NA	NA	NA	Yes	Yes	No individual AUV data for each single biomarker, the study build model discriminating one condition from all other diseases
50	Multiple Reaction Monitoring-Ion Pair Finder: A Systematic Approach To Transform Nontargeted Mode to Pseudotargeted Mode for Metabolomics Study Based on Liquid Chromatography-Mass Spectrometry	Luo et al.	2015	China	Single	No	Yes	Yes	Diagnosis	No	No	No	HCC	Cancer	30	Healthy control	30	ND	No	ND	ND	Serum	Untargeted/targeted metabolomics and lipidomics(pseudotargeted)	Yes	LC-MS	ND	Yes	Yes	MS/MS, rtmz, authentic standard, public database	Yes	ND	ND	ND	ND	ND	ND	ND	ND	ND	ND	ND	This is a method development study
54	Metabolomics approach to understand the hepatitis C virus induced hepatocellular carcinoma using LC-ESI-MS/MS	Sindhia Kumari, Arslan Ali, Talat Roome, Anam Razzak, Ayesha Iqbal, Amna Jabbar Siddiqui, Syed Muhammad Zahid Azam, Hafeezullah Shaikh, Hesham R. El-Seedi, Syed Ghulam Musharraf	2020	Pakistan	Multi-institution	No	No	ND	Diagnosis/Prognosis	No	No	No(Most of patients were males)	HCC	Cancer	11	Healthy control	41	ND	Yes	Yes(HCV)	Yes	Serum	Untargeted metabolomics	No	LC-MS	-80	Yes	Yes	m/z, MS/MS spectra, NIST tandem mass spectral library, HMDB	Yes	Uni/multivariate statistical analysis, volcano plot, PCA, OPLS-DA, hotelling's T2 plot, ROC curve,	NA	Yes	1	0.909	0.89(HCC)	NA	0.509	-0.321	No	No
59	Metabolic perturbations prior to hepatocellular carcinoma diagnosis: Findings from a prospective observational cohort study	Magdalena Stepien, Pekka Keski-Rahkonen, Agneta Kiss, Nivonirina Robinot, Talita Duarte-Salles, Neil Murphy, Gabriel Perlemuter, Vivian Viallon, Anne Tjønneland, Agnetha Linn Rostgaard-Hansen, Christina C. Dahm, Kim Overvad, Marie-Christine Boutron-Ruault, Francesca Romana Mancini, Yahya Mahamat-Saleh, Krasimira Aleksandrova, Rudolf Kaaks, Tilman Kühn, Antonia Trichopoulou, Anna Karakatsani, Salv…	2020	Denmark, France, Germany, Greece, Italy, the Netherlands, Norway, Spain, Sweden, and the United Kingdom	Multi-institution	No	Yes	ND	Diagnosis	No	Yes	Umm(Women% : 31.8%)	HCC	Cancer	129	Healthy control	129	ICD10, ICD-O-2	Yes	p.5) HBV or/and HCV infection : case group(25.6%), control group(3.1%)	No	Serum	Untargeted metabolomics	Yes?	LC-MS	-196(except samples from Denmark(-150) and Sweden(-80))	Yes	No	Authentic standards, HMDB, METLIN, mzCloud, m/z, RT, MS/MS	Yes	conditional logistic regression model, crude model, detailed multivariable model, Benjamini-Hochberg correction, Pearson correlation, PCA, ROC curve	Cross-validation	Yes	NA	NA	NA	NA	NA	NA	Yes	Yes	Supp file profile more detail information
64	Establishment of a pattern recognition metabolomics model for the diagnosis of hepatocellular carcinoma	Peng-Cheng Zhou, Lun-Quan Sun, Li Shao, Lun-Zhao Yi, Ning Li, Xue-Gong Fan	2020	China	Single?	No?	No	Yes	Diagnosis	No	Yes	Yes(it seems yes, but the paper says there are no significant differences in sex)	HCC	Cancer	30	Healthy control	31	HCC diagnosis criteria set by the Ministy of Health, Chinese HCC staging system	Yes	Yes(mostly HBV)	Yes	Serum	Untargeted metabolomics	Yes?	LC-MS	-80	Yes	Yes	Authentic standards, m/z, mzRT	Yes	PCA, PLS-DA, OPLS-DA, Kreksal-Wallis test, Linear discriminant analysis, ROC, AUC	Cross-validation	Yes	Yes	Yes	Yes	Yes	NA	NA	No	No	Prediction model of biomarker panel
68	Characterisation of the Serum Metabolic Signature of Cholangiocarcinoma in a United Kingdom Cohort	Munirah Alsaleh, Zoe Leftley, Thomas A. Barbera, Larry K. Koomson, Abigail Zabron, Mary M. E. Crossey, Helen L. Reeves, Matthew Cramp, Stephen Ryder, Shaun Greer, Martin Prince, Paiboon Sithithaworn, Mohamed Shariff, Narong Khuntikeo, Watcharin Loilome, Puangrat Yongvanit, Yi-Liang Shen, I. Jane Cox, Roger Williams, Christopher A. Wadsworth, Elaine Holmes, Kathryn Nash, Simon D. Taylor-Robinson	2019	UK	Multi-institution	Yes	No	ND	Diagnosis	No	No	No	HCC	Cancer	11	Healthy control	20	ND	Yes	ND	No	Serum	Untargeted metabolomics	No	LC-MS	-80	Yes	Yes	m/z, RT, HMDB, METLIN, Lipid Maps, tandem MS	Yes	PCA, OPLS-DA, ANOVA, Spearman's rank-order correlation	Cross-validation	Yes	NA	NA	NA	NA	0.9	0.7	No	No	OPLS-DA of positive was picked
69	Association between Pre-Diagnostic Serum Bile Acids and Hepatocellular Carcinoma: The Singapore Chinese Health Study	Claire E. Thomas, Hung N. Luu, Renwei Wang, Guoxiang Xie, Jennifer Adams-Haduch, Aizhen Jin, Woon-Puay Koh, Wei Jia, Jaideep Behari and Jian-Min Yuan	2021	China (Singapore Chinese)	Single	No	Yes	ND	Diagnosis	No	Yes	Woman25%	HCC	Cancer	100	Healthy control	100	ND	Yes	Yes(HBV40%, HCV2%)	No	Serum Bile acid	Untargeted and targeted metabolomics	No?	LC-MS	-80	Yes	Yes	Commercial kits	No	t-test, Chi-square test, ANOVA, Spearman correlation coefficient, conditional logistic regression method	ND	Yes	NA	NA	NA	NA	NA	NA	No	No	Detail information can be extracted in the table
71	Metabolomic estimation of the diagnosis of hepatocellular carcinoma based on ultrahigh performance liquid chromatography coupled with time-of-flight mass spectrometry	Li, Y. F. and Qiu, S. and Gao, L. J. and Zhang, A. H.	2018	China	Single	No	No	Yes	Diagnosis	No	Yes (age-matched)	No	HCC	Cancer	70	Healthy control	65	Pathologically confirmed	Yes	Yes (100% HBV)	Yes	Plasma	Untargeted metabolomics	No	LC-MS and GC-MS	-80	Yes	Yes	MS/MS, public database and authentic standards	Yes	Multivariate analysis and ROC analysis	Cross-validation	No	NA	NA	NA	NA	NA	NA	Yes	Yes (log fold change)	Please extract the Table S5 in line of the p-value of the Table S2.
72	Analysis of plasma metabolic profile, characteristics and enzymes in the progression from chronic hepatitis B to hepatocellular carcinoma	Fei-Fei Cai, Ya-Nan Song, Yi-Yu Lu, Yongyu Zhang, Yi-Yang Hu, Shi-Bing Su	2020	China	Single	No	No	Yes(before breakfast)	Diagnosis/Prognosis	No	No	ND	HCC	Cancer	39	Healthy control	50	Chinese medicine clinical research guidelines” (third edition) : previous paper	Yes	Yes(HBV)	Yes	Plasma	Untargeted metabolomics	Yes?	GC-MS	-80	Yes	No	Identification of metabolites were carried out using the Agilent Mass hunter Workstation, To identify the differential metabolites, OPLS analysis was performed	No	ROC curve, PLS-DA, OPLS, VIP, Kruskal-Wallis test, Fisher's exact test	ND	Yes	NA	NA	0.8651	NA	NA	NA	No	No	L-serine, cystathionine, creatine and linoleic acid panel
74	Metabolomic profiles of hepatocellular carcinoma in a European prospective cohort	Fages, A. and Duarte-Salles, T. and Stepien, M. and Ferrari, P. and Fedirko, V. and Pontoizeau, C. and Trichopoulou, A. and Aleksandrova, K. and Tjonneland, A. and Olsen, A. and Clavel-Chapelon, F. and Boutron-Ruault, M. C. and Severi, G. and Kaaks, R. and Kuhn, T. and Floegel, A. and Boeing, H. and Lagiou, P. and Bamia, C. and Trichopoulos, D. and Palli, D. and Pala, V. and Panico, S. and Tumino…	2015	Europe	Multi-country	No	Yes	Yes	Diagnosis	No	Yes (age, sex, study center, fasting, women related factors)	Yes	HCC	Cancer	114	Healthy control	222	Pathologically confirmed	Yes	Yes	No	Serum	Untargeted metabolomics	No	1H NMR	Liquid nitrogen and -80	Yes	Yes	Public database	Yes	ANOVA, OPLS-DA, CLR, ROC analysis	Cross-validation	Yes	NA	NA	0.73-0.82	NA	NA	NA	Yes	Yes	Please extract the table 2.
76	Metabolomics and eicosanoid analysis identified serum biomarkers for distinguishing hepatocellular carcinoma from hepatitis B virus-related cirrhosis	Gong, Z. G. and Zhao, W. and Zhang, J. and Wu, X. and Hu, J. and Yin, G. C. and Xu, Y. J.	2017	China	Single	No	ND	Yes	Diagnosis	No	No	Yes (HCC group)	HCC	Cancer	51	Healthy control	39	ND	Yes	Yes	No	Serum	Untargeted metabolomics and targeted eicosanoid analysis	No	GC-MS and LC-MS	-80	Yes	Yes	Commercial database and public database	Yes	Univariate, multivariate analysis	Cross-validation	No	NA	NA	0.843-0.886	NA	NA	NA	Maybe yes	Maybe no	Please check the supplementary file for detailed information. Extract both metabolites and eicosanoids
78	Metabolomics Profiles of Hepatocellular Carcinoma in a Korean Prospective Cohort: The Korean Cancer Prevention Study-II	Jee, S. H. and Kim, M. and Kim, M. and Yoo, H. J. and Kim, H. and Jung, K. J. and Hong, S. and Lee, J. H.	2018	Korea	Multi-institution	No	Yes	Yes	Diagnosis	No	Yes (age and gender)	ND	HCC	Cancer	75	Healthy control	134	Pathologically confirmed	Yes	Yes	Yes	Serum	Untargeted metabolomics	No	LC-MS	-70	Yes	ND	ND	No	Univariate, multivariate analysis, ROC analysis	Cross-validation	Yes	NA	NA	NA	NA	0.798-0.882	0.604-0.658	Yes	No	Table 2 and Table 3 are important
79	Metabolomics study of hepatocellular carcinoma: discovery and validation of serum potential biomarkers by using capillary electrophoresis-mass spectrometry	Zeng, J. and Yin, P. and Tan, Y. and Dong, L. and Hu, C. and Huang, Q. and Lu, X. and Wang, H. and Xu, G.	2014	China	Single	Yes	ND	Yes	Diagnosis	No	Yes (age and gender)	No	HCC	Cancer	72	Healthy control	61	Pathologically confirmed	Yes	Yes	Yes	Serum	Untargeted metabolomics	No	CE-MS	-80	Yes	Yes	Commercial database and authentic standards	Yes	Univariate, multivariate analysis, ROC analysis	External validation	Yes	NA	NA	NA	NA	NA	NA	Yes	Yes	Focus on the Table S1. HCC vs Cirrhosis and HCC vs healthy. Put more attention to the Trp, Gln, Arg, 2-hydroxybutyric acid, and 3/4-methyl-2-oxovaleric acid
81	Metabonomic profiles discriminate hepatocellular carcinoma from liver cirrhosis by ultraperformance liquid chromatography-mass spectrometry	Wang, B. and Chen, D. and Chen, Y. and Hu, Z. and Cao, M. and Xie, Q. and Chen, Y. and Xu, J. and Zheng, S. and Li, L.	2012	China	Single	No	ND	Yes	Diagnosis	No	No	Yes	HCC	Cancer	82	Healthy control	90	Pathologically confirmed/AJCC	Yes	Yes (100% HBV)	Yes	Serum	Untargeted metabolomics	No	LC-MS	ND	Yes	ND	literature search, MS/MS, public database and authentic standards	Yes	Univariate, multivariate analysis, and ROC analysis	External validation	No	NA	NA	NA	NA	0.984	0.974	Maybe no	Should be calculated from Table 3	Focus on Table 3. Some manual calculation may be needed.
90	NMR and LC/MS-based global metabolomics to identify serum biomarkers differentiating hepatocellular carcinoma from liver cirrhosis	Liu, Y. and Hong, Z. and Tan, G. and Dong, X. and Yang, G. and Zhao, L. and Chen, X. and Zhu, Z. and Lou, Z. and Qian, B. and Zhang, G. and Chai, Y.	2014	China	Multi-institution	No	ND	ND	Diagnosis	No	No	Yes	HCC	Cancer	71	Healthy control	26	AJCC	Yes	Yes	Yes	Serum	Untargeted metabolomics	No	LC-MS and NMR	-80	Yes	Yes	MS/MS, public database, and authentic standards	Yes	Multivariate analysis	External validation	No	NA	NA	NA	NA	NA	NA	Yes	Manually calculated	Please check their tables (one for NMR and one for LC-MS, it may be overlapped).
98	Plasma Lipidomic Analysis to Identify Novel Biomarkers for Hepatocellular Carcinoma	Yang, L. and Bai, Y. and Han, X. H. and Shi, Y. K. and Liu, H. W.	2017	China	Single	No	ND	ND	Diagnosis	No	No	ND	HCC	Cancer	7	Healthy control	13	ND	No	ND	Yes	Plasma	Untargeted lipidomics	No	LC-MS	ND	Yes	Yes	m/z, MS/MS, RT	No	Univariate and multivariate analysis	Cross-validation	Yes	NA	NA	NA	NA	NA	NA	Yes	Yes	Please check Table 2.
100	Plasma metabolomic analysis of human hepatocellular carcinoma: Diagnostic and therapeutic study	Chen, Y. and Zhou, J. Y. and Li, J. Q. and Feng, J. H. and Chen, Z. and Wang, X. M.	2016	China	Single	No	ND	ND	Diagnosis	No	No	Yes	HCC	Cancer	24	Healthy control	60	Pathologically confirmed (or imaging evidence + AFP)	No	Yes (100% HBV)	Yes	Plasma	Untargeted metabolomics	No	1H NMR	-80	Yes	Yes	Public database and literature	NA	Univariate and multivariate analysis	Cross-validation	No	NA	NA	NA	NA	NA	NA	No	Yes by manually calculated	This study also investigated pre- and post-surgery HCC (together with the first study)
104	Pseudotargeted metabolomics method and its application in serum biomarker discovery for hepatocellular carcinoma based on ultra high-performance liquid chromatography/triple quadrupole mass spectrometry	Chen, S. and Kong, H. and Lu, X. and Li, Y. and Yin, P. and Zeng, Z. and Xu, G.	2013	China	Single	No	ND	ND	Diagnosis	No	Yes	ND	HCC	Cancer	29	Healthy control	30	ND	No	ND	Yes	Serum	Untargeted and targeted metabolomics	Yes	LC-MS	ND	Yes	No	ND	Yes	univariate and multivariate analysis	Cross-validation	No	NA	NA	NA	NA	NA	NA	No	No (up-down)	Please check Figure 6.
107	Serum and urine metabolite profiling reveals potential biomarkers of human hepatocellular carcinoma	Chen, T. and Xie, G. and Wang, X. and Fan, J. and Qiu, Y. and Zheng, X. and Qi, X. and Cao, Y. and Su, M. and Wang, X. and Xu, L. X. and Yen, Y. and Liu, P. and Jia, W.	2011	China	Single	No	ND	ND	Diagnosis	No	No	No	HCC	Cancer	82	Healthy control	71	TNM	Yes	Yes	Yes	Serum	Untargeted metabolomics and targeted analysis	Yes	GC-MS and LC-MS	-80	Yes	Yes	Commercial database and authentic standards	Yes	Univariate and multivariate analysis	Cross-validation	No	NA	NA	NA	NA	NA	NA	Yes	Yes	Please check Table 2. Also, this paper is important since they report the metabolites that are associated with hepatitis and cirrhosis!
111	Serum lipidomic profiling as a useful tool for screening potential biomarkers of hepatitis B-related hepatocellular carcinoma by ultraperformance liquid chromatography-mass spectrometry	Passos-Castilho, A. M. and Carvalho, V. M. and Cardozo, K. H. M. and Kikuchi, L. and Chagas, A. L. and Gomes-Gouvêa, M. S. and Malta, F. and de Seixas-Santos Nastri, A. C. and Pinho, J. R. R. and Carrilho, F. J. and Granato, C. F. H.	2015	Brazil	Single (normal samples were from another place)	No	No	ND	Diagnosis	No	No	Yes	HCC	Cancer	32	Healthy control	34	Brazilian Society of Hepatology	Yes	Yes (HBV)	Yes	Serum	Untargeted lipidomics	No	LC-MS	-80	Yes	No	Public database	Yes	Univariate and multivariate analysis	Cross-validation	No	NA	NA	NA	NA	NA	NA	Maybe no	No (up-down)	Table 3 and Table 4 are important
113	The serum metabolic profiles of different Barcelona stages hepatocellular carcinoma associated with hepatitis B virus	Zhang, L. and Wu, G. Y. and Wu, Y. J. and Liu, S. Y.	2018	China	Single	No	No	Yes	Diagnosis	No	No	Yes	HCC	Cancer	75	Healthy control	20	Barcelona	Yes	Yes (HBV)	Yes	Serum	Untargeted metabolomics	No	LC-MS	-80	Yes	Yes	MS/MS, rtmz, authentic standard, public database	Yes	Univariate and multivariate analysis	Cross-validation	Yes	NA	NA	NA	NA	NA	NA	Maybe no	No (up and down)	This study mentioned the dietary requirements of the enrolled patients. Please check Table II. Also please consider if we can extract the biomarkers for the early stage only.
114	Serum Metabolic Profiling Study of Hepatocellular Carcinoma Infected with Hepatitis B or Hepatitis C Virus by Using Liquid Chromatography-Mass Spectrometry	Zhou, L. N. and Ding, L. L. and Yin, P. Y. and Lu, X. and Wang, X. M. and Niu, J. Q. and Gao, P. J. and Xu, G. W.	2012	China	Single	No	No	Yes	Diagnosis	No	No	Yes	HCC	Cancer	69	Healthy control	31	ND	Yes	Yes	Yes	Serum	Untargeted metabolomics and semi-targeted metabolomics	No	LC-MS	-80	Yes	Yes	ND	Yes	Univariate and multivariate analysis	External validation	No	NA	NA	NA	NA	NA	NA	Yes (not adjusted values)	Yes	Please check their table 2. They compared HCC HBV and HCC HCV.
114	The serum metabolic profiles of different Barcelona stages hepatocellular carcinoma associated with hepatitis B virus	Zhou, L. N. and Ding, L. L. and Yin, P. Y. and Lu, X. and Wang, X. M. and Niu, J. Q. and Gao, P. J. and Xu, G. W.	2012	China	Single	No	No	Yes	Diagnosis	No	No	Yes	HCC	Cancer	69	Healthy control	31	ND	Yes	Yes	Yes	Serum	Untargeted metabolomics and semi-targeted metabolomics	No	LC-MS	-80	Yes	Yes	ND	Yes	Univariate and multivariate analysis	External validation	No	NA	NA	NA	NA	NA	NA	Yes (not adjusted values)	Yes	Please check their table 2. They compared HCC HBV and HCC HCV.
115	Serum Metabolites as Diagnostic Biomarkers for Cholangiocarcinoma, Hepatocellular Carcinoma, and Primary Sclerosing Cholangitis	Banales, J. M. and Inarrairaegui, M. and Arbelaiz, A. and Milkiewicz, P. and Muntane, J. and Munoz-Bellvis, L. and La Casta, A. and Gonzalez, L. M. and Arretxe, E. and Alonso, C. and Martinez-Arranz, I. and Lapitz, A. and Santos-Laso, A. and Avila, M. A. and Martinez-Chantar, M. L. and Bujanda, L. and Marin, J. J. G. and Sangro, B. and Macias, R. I. R.	2018	Spain and Poland	Multiple countries	Yes	No	Yes	Diagnosis	No	No	Yes (HCC)	HCC	Cancer	20	Healthy control	20	BCLC	Yes	Yes	Yes (mostly BCLCA)	Serum	Targeted lipidomics	Yes (semi-quantification)	LC-MS	-80	Yes	Yes	ND	Yes	Univariate and multivariate analysis	External validation	Yes	NA	NA	NA	NA	NA	NA	Maybe no	Maybe no	Please check Figure 2 and supplementary files to check the logFC and p-value (if available)
119	Serum metabolomics reveals the deregulation of fatty acids metabolism in hepatocellular carcinoma and chronic liver diseases	Zhou, L. and Wang, Q. and Yin, P. and Xing, W. and Wu, Z. and Chen, S. and Lu, X. and Zhang, Y. and Lin, X. and Xu, G.	2012	China	Single	No	No	Yes	Diagnosis	No	Yes (age and sex)	Yes	HCC	Cancer	30	Healthy control	30	Biochemical and imaging criteria	Yes	Yes (HBV)	Yes	Serum	Untargeted metabolomics and targeted fatty acid analysis	No	LC-MS	-80	Yes	No	mzRT, MS/MS, public database and authentic standards	Yes	Univariate analysis and multivariate analysis	Cross-validation	No	NA	NA	NA	NA	NA	NA	Partially yes	Yes (compared with healthy controls)	Please check Table 2 and check if we can extract fold change for other comparisons
120	Serum Metabolomics to Identify the Liver Disease-Specific Biomarkers for the Progression of Hepatitis to Hepatocellular Carcinoma	Gao, R. and Cheng, J. and Fan, C. and Shi, X. and Cao, Y. and Sun, B. and Ding, H. and Hu, C. and Dong, F. and Yan, X.	2015	China	Single	No	No	Yes	Diagnosis	No	Yes (age and sex)	Yes	HCC	Cancer	39	Healthy control	61	Biochemical and imaging criteria	Yes	Yes (HBV)	Yes	Serum	Untargeted metabolomics	No	GC-MS	-80	Yes	Yes	Commercial database	Yes	Univariate analysis and multivariate analysis	External validation	No	NA	NA	NA	NA	NA	NA	No	No	Please manually extract the metabolites from Figure 2b
128	Tissue and serum metabolite profiling reveals potential biomarkers of human hepatocellular carcinoma	Han, J. and Qin, W. X. and Li, Z. L. and Xu, A. J. and Xing, H. and Wu, H. and Zhang, H. and Wang, M. D. and Li, C. and Liang, L. and Quan, B. and Yan, W. T. and Shen, F. and Wu, M. C. and Yang, T.	2019	China	Single	No	No	ND	Diagnosis	No	No	Yes	HCC	Cancer	30	Healthy control	30	Histologically confirmed	Yes	Yes (mostly HBV)	Yes	Serum	Untargeted metabolomics	No	LC-MS	-80	Yes	Yes	Public database and authentic standards	Yes	Univariate analysis and multivariate analysis	Cross-validation	No	NA	NA	NA	NA	NA	NA	Check supplementary Table S1	Check supplementary Table S1	Please focus on Supplementary Table S2
137	Comprehensive Metabolomic Search for Biomarkers to Differentiate Early Stage Hepatocellular Carcinoma from Cirrhosis	Kim DJ, Cho EJ, Yu KS, Jang IJ, Yoon JH, Park T, Cho JY	2019	Korea	Single	Yes	Yes	Yes	Diagnosis	No	Yes	Yes (not statistically significant)	HCC	Cancer	135	Healthy control	50	BCLC	Yes	Yes (mainly HBV)	No	Serum	Untargeted and targeted metabolomics	Yes	GC-MS and LC-MS	-80	Yes	Yes	Commercial kits	ND	Univariate and multivariate analysis	External validation	Yes	NA	NA	NA	NA	NA	NA	Yes	Yes (calculate from Table S2)	Please check Supplementary Table S2 and Table S3
56	Metabolomic Profiles for HBV Related Hepatocellular Carcinoma Including Alpha-Fetoproteins Positive and Negative Subtypes	Jianping Sun, Yanan Zhao, Ling Qin, Kang Li, Yan Zhao, Huanqin Sun, Ting Zhang and Yonghong Zhang	2019	China	Single	No	No	ND	Diagnosis	No	Yes	Yes	HCC	Cancer(AFP+, AFP-)	70(30, 40)	Hepatitis B, healty control	60(30, 30)	EASL	Yes	Yes(HBV)	No	Plasma	Untargeted and targeted metabolomics	Yes	LC-MS	-80	Yes	No	m/z, RT, HMDB	Yes	PCA, OPLS-DA, VIP, Mann-Whitney U-test, Fisher's exact test, ROC analysis	External validation	Yes							No	No	Multiple ROC data for both lipids and metabolites
25	Detection of hepatocellular carcinoma in hepatitis C patients: biomarker discovery by LC-MS	Bowers, J. and Hughes, E. and Skill, N. and Maluccio, M. and Raftery, D.	2014	USA	Single	No	No	Yes	Diagnosis	No	No	ND	HCC	Cancer	37	Hepatitis C	21	Pathologically confirmed	No	Yes	Yes	Serum	Untargeted metabolomics	No	LC-MS	-80	Yes	No	Authentic standard	Yes	PLS-DA and ROC analysis	Cross-validation	No	0.73	0.95	0.92	NA	NA	NA	Yes	No	All patients are from stage-4 cirrhosis. They have a p-value selection step before PLS-DA
4	Aberrant lipid metabolism in hepatocellular carcinoma revealed by plasma metabolomics and lipid profiling	Patterson, A. D. and Maurhofer, O. and Beyoglu, D. and Lanz, C. and Krausz, K. W. and Pabst, T. and Gonzalez, F. J. and Dufour, J. F. and Idle, J. R.	2011	USA/Switzerland	Single	No	No	ND	Diagnosis	No	No	Yes (HCC)	HCC	Cancer	20	Normal	6	European Association for the Study of the Liver (EASL)	Yes	Yes	Yes	Plasma/Serum	Untargeted and targeted lipidomics	Yes	LC-MS and GC-MS	-80	Yes	Yes	TandemMS, Standard, and MS	ND	PCA, PLS-DA, and Random Forest	ND	No	NA	NA	NA	1	NA	NA	No	Yes	NA
19	Classification and differential metabolite discovery of liver diseases based on plasma metabolic profiling and support vector machines	Lin, X. H. and Zhang, Y. and Ye, G. Z. and Li, X. and Yin, P. Y. and Ruan, Q. and Xu, G. W.	2011	China	Single	No	No	ND	Diagnosis	No	No	ND	HCC	Cancer	28	Normal	30	Radiologically confirmed	No	Yes	Yes	Plasma	Untargeted metabolomics	No	GC-MS	-80	Yes	Yes	Commercial database	Yes	T-test, ANOVA/SVM for feature selection	Cross-validation	No	NA	NA	NA	0.7368	NA	NA	Yes	Yes	Only care of the pairs that have HCC. The accuracy seems to be from the discriminant analysis among three groups
21	Comparison of hepatic and serum lipid signatures in hepatocellular carcinoma patients leads to the discovery of diagnostic and prognostic biomarkers	Lu, Y. and Chen, J. and Huang, C. and Li, N. and Zou, L. and Chia, S. E. and Chen, S. and Yu, K. and Ling, Q. and Cheng, Q. and Zhu, M. and Zhang, W. and Chen, M. and Ong, C. N.	2018	China	Multi-institution	No	No	Yes	Diagnosis	Yes	No	No	HCC	Cancer	18	Normal	20	TNM	Yes	Yes	Yes	Serum	Untargeted lipidomics	No	LC-MS	-80	Yes	Yes	MS/MS and public database	Yes	T-test, PCA, and PLS-DA	External validation	Yes	0.89	0.95	0.946	NA	NA	NA	Maybe no (check supp files)	No	Lots of info can be extracted from the supplementary file. Adding the AFP level will improve the modeling. Only the combined model is reported here. This study demonstrates our scoring system is correct. Indeed, the hepatic and serum lipid changes of HCC are "rather difference and independent".
23	Comprehensive characterization and evaluation of hepatocellular carcinoma by LC-MS based serum metabolomics	Lu, X. and Nie, H. and Li, Y. Q. and Zhan, C. and Liu, X. and Shi, X. Y. and Shi, M. and Zhang, Y. B. and Li, Y.	2015	China	Multi-institution	No	No	Yes	Diagnosis	No	No	ND	HCC	Cancer	267	Normal	272	Pathologically confirmed	Yes	Yes	Yes	Serum	Untargeted metabolomics	No	LC-MS	-80	Yes	Yes	MS/MS, public database, and authentic standards	Yes	Kruskal-Wallis rank sum test, PCA, PLS-DA, Random forest, multivariate logistic regression	Cross-validation and external validation	No	0.96	0.92	0.98	NA	NA	NA	Maybe yes (check supp files)	Maybe no	Please be careful when extract the final information for this research. Only the 3 metabolites plus AFP level signature in the external validation set is reported.
47	Identification of serum biomarkers associated with hepatitis B virus-related hepatocellular carcinoma and liver cirrhosis using mass-spectrometry-based metabolomics	Lu, Y. and Huang, C. and Gao, L. and Xu, Y. J. and Chia, S. E. and Chen, S. and Li, N. and Yu, K. and Ling, Q. and Cheng, Q. and Zhu, M. and Chen, M. and Ong, C. N.	2015	China	Single	No	No	Yes	Diagnosis	Yes	Yes	Yes	HCC	Cancer	36	Normal	19	ND	Yes	Yes (100% HBV)	Yes	Serum	Untargeted metabolomics	No	LC-MS and GC-MS	ND	Yes	Yes	MS/MS, public database, commercial database, and authentic standards	Yes	Univariate, multivariate, ROC analysis	External-validation	Yes	NA	NA	NA	NA	NA	NA	No	No	We only extract data from HCC (with and without cirrohsis) vs normal control in this study.
48	Identification of serum biomarkers of hepatocarcinoma through liquid chromatography/mass spectrometry-based metabonomic method	Chen, F. and Xue, J. and Zhou, L. and Wu, S. and Chen, Z.	2011	China	Single	No	No	Yes	Diagnosis	No	No	Yes	HCC	Cancer	41	Normal	38	ND	Yes	Yes	Yes	Serum	Untargeted metabolomics	No	LC-MS	ND	Yes	No	MS/MS, public database	ND	Univariate analysis, PCA	NA	No	NA	NA	NA	NA	NA	NA	No	No	It seems that only one metabolite is reported

## Sheet: Table S2
Tabls S2. The characteristics of all reported compounds across the included studies.
HMDB_ID/Pubchem ID		NAME	Study 1			Study 3			Study 4			Study 4			Study 19			Study 19			Study 21			Study 21			Study 21			Study 23			Study 25			Study 30			Study 37			Study 37			Study 39			Study 40
x		x	HCC vs Healthy			HCC vs Liver Cirrhosis			HCC vs Liver cirrhosis			HCC vs Healthy			HCC vs Healthy			Liver Cirrhosis versus Healthy			HCC vs Healthy			HCC vs Liver Cirrhosis			Liver Cirrhosis vs Healthy			HCC and non-HCC controls			HCC vs Liver Cirrhosis			HCC vs Cirrhosis			HCC vs Liver Cirrhosis			HCC vs Liver Cirrhosis			HCC vs Liver Cirrhosis			HCC vs Liver Cirrhosis
x	Species	*note: Fatty acid and conjugated, cartinine is changed to abrreviation forms (e.g. FA/CAR)	p Value	Fold Change	Direction	p Value	Fold Change	Direction	p Value	Fold Change	Direction	p Value	Fold Change	Direction	p Value	Fold Change	Direction	p Value	Fold Change	Direction	p Value	Fold Change	Direction	p Value	Fold Change	Direction	p Value	Fold Change	Direction	p Value	Fold Change	Direction	p Value	Fold Change	Direction	p Value	Fold Change	Direction	p Value	Fold Change	Direction	p Value	Fold Change	Direction	p Value	Fold Change	Direction	p Value	Fold Change
HMDB0001518	1-benzopyrans	Alpha-CEHC
HMDB0001931	1-benzopyrans	γ-Carboxyethyl hydroxychroman
HMDB0000108	Alcohols and polyols	Ethanol
HMDB0000211	Alcohols and polyols	Myo-inositol
HMDB0001881	Alcohols and polyols	1,2-propanediol
HMDB0000008	Alpha hydroxy acids and derivatives	2-Hydroxybutyric acid
HMDB0001311	Alpha hydroxy acids and derivatives	D-Lactic acid																																											0.0028	-1.3	down
HMDB0000148	Amino acids, peptides, and analogues	L-Glutamic acid													P<0.01	0.28	Down	P<0.01	0.38	Down										p< 0.0001	NA	up				P>0.05	NA	Up							5.5e-08	1.9	up
HMDB0000001	Amino acids, peptides, and analogues	1-Methylhistidine
HMDB0000043	Amino acids, peptides, and analogues	Betaine
HMDB0000064	Amino acids, peptides, and analogues	Creatine
HMDB0000070	Amino acids, peptides, and analogues	Pipecolinic acid
HMDB0000092	Amino acids, peptides, and analogues	N,N-Dimethylglycine
HMDB0000099	Amino acids, peptides, and analogues	Cystathionine
HMDB0000112	Amino acids, peptides, and analogues	gamma-Aminobutyric acid
HMDB0000123	Amino acids, peptides, and analogues	Glycine																																														0.015	1.09
HMDB0000128	Amino acids, peptides, and analogues	Guanidoacetic acid
HMDB0000158	Amino acids, peptides, and analogues	L-Tyrosine													P<0.01	0.06	Down	P<0.01	0.06	Down										p< 0.0001	NA	down
HMDB0000159	Amino acids, peptides, and analogues	L-Phenylalanine													P<0.05	1.69	Up	P<0.05	1.52	Up										p< 0.0001	NA	down
HMDB0000161	Amino acids, peptides, and analogues	L-Alanine
HMDB0000162	Amino acids, peptides, and analogues	L-Proline													P<0.01	0.33	Down	P<0.01	0.42	Down
HMDB0000167	Amino acids, peptides, and analogues	L-Threonine																												p< 0.0001	NA	down				P<0.05	NA	Down
HMDB0000168	Amino acids, peptides, and analogues	L-Asparagine
HMDB0000172	Amino acids, peptides, and analogues	L-Isoleucine																																											0.0423	1.5	Up
HMDB0000177	Amino acids, peptides, and analogues	L-Histidine																												p< 0.0001	NA	up
HMDB0000182	Amino acids, peptides, and analogues	L-Lysine																												p< 0.0001	NA	down
HMDB0000187	Amino acids, peptides, and analogues	L-Serine																												p< 0.0001	NA	down
HMDB0000191	Amino acids, peptides, and analogues	L-Aspartic acid													P<0.01	1.75	Up	P<0.01	1.54	Up										p< 0.05	NA	down
HMDB0000192	Amino acids, peptides, and analogues	L-Cystine
HMDB0000206	Amino acids, peptides, and analogues	N6-acetyllysine
HMDB0000214	Amino acids, peptides, and analogues	Ornithine
HMDB0000248	Amino acids, peptides, and analogues	Thyroxine
HMDB0000267	Amino acids, peptides, and analogues	oxoproline
HMDB0000271	Amino acids, peptides, and analogues	Sarcosine
HMDB0000323	Amino acids, peptides, and analogues	3-Amino-2-piperidone
HMDB0000512	Amino acids, peptides, and analogues	Acetylphenylalanine	P<0.01	NA	Up
HMDB0000517	Amino acids, peptides, and analogues	L-Arginine																												p< 0.0001	NA	down
HMDB0000532	Amino acids, peptides, and analogues	Acetylglycine
HMDB0000562	Amino acids, peptides, and analogues	Creatinine
HMDB0000641	Amino acids, peptides, and analogues	L-Glutamine																												p< 0.0001	NA	down
HMDB0000670	Amino acids, peptides, and analogues	Homoarginine
HMDB0000687	Amino acids, peptides, and analogues	L-Leucine													P<0.05	1.35	Up													p< 0.0001	NA	down													0.0186	1.6	Up
HMDB0000696	Amino acids, peptides, and analogues	L-Methionine													P<0.01	2.29	Up	P<0.01	1.55	Up										p< 0.0001	NA	up
HMDB0000706	Amino acids, peptides, and analogues	Aspartyl phenylalanine																												p< 0.0001	NA	down
HMDB0000719	Amino acids, peptides, and analogues	L-Homoserine
HMDB0000725	Amino acids, peptides, and analogues	Trans-4-Hydroxyproline
HMDB0000742	Amino acids, peptides, and analogues	Homocysteine
HMDB0000766	Amino acids, peptides, and analogues	N-Acetyl-L-alanine
HMDB0000866	Amino acids, peptides, and analogues	N-Acetyl-L-tyrosine
HMDB0000883	Amino acids, peptides, and analogues	L-Valine																																											0.0104	1.2	Up
HMDB0000904	Amino acids, peptides, and analogues	Citrulline
HMDB0001147	Amino acids, peptides, and analogues	Aminomalonic acid													P<0.01	0.36	Down	P<0.01	0.34	Down
HMDB0001325	Amino acids, peptides, and analogues	N6,N6,N6-Trimethyl-L-lysine
HMDB0002005	Amino acids, peptides, and analogues	Methionine sulfoxide
HMDB0002931	Amino acids, peptides, and analogues	N-acetylserine
HMDB0003157	Amino acids, peptides, and analogues	Guanidinosuccinic acid
HMDB0003357	Amino acids, peptides, and analogues	N-Acetylornithine
HMDB0003417	Amino acids, peptides, and analogues	D-Cysteine
HMDB0003640	Amino acids, peptides, and analogues	Beta-Leucine
HMDB0004195	Amino acids, peptides, and analogues	5-L-Glutamyl-taurine
HMDB0006483	Amino acids, peptides, and analogues	D-Aspartic acid
HMDB0011733	Amino acids, peptides, and analogues	Gly-Gly
HMDB0012197	Amino acids, peptides, and analogues	canavaninosuccinate
HMDB0012250	Amino acids, peptides, and analogues	L-Aspartyl-4-phosphate
HMDB0012286	Amino acids, peptides, and analogues	S-Prenyl-Cysteine																												p< 0.0001	NA	down
HMDB0013713	Amino acids, peptides, and analogues	N-acetyltryptophan
HMDB0028739	Amino acids, peptides, and analogues	Asparaginyl-proline
HMDB0028757	Amino acids, peptides, and analogues	Aspartyl leucine
HMDB0028818	Amino acids, peptides, and analogues	L-Glutamyl-L-Glutamate																												p< 0.0001	NA	up
HMDB0028839	Amino acids, peptides, and analogues	L-Glycyl-L-glutamine																												p< 0.0001	NA	down
HMDB0028848	Amino acids, peptides, and analogues	L-Glycyl-L-Phenylalanine																												p< 0.0001	NA	down
HMDB0028854	Amino acids, peptides, and analogues	Glycylvaline
HMDB0028914	Amino acids, peptides, and analogues	Isoleucyl-Phenylalanine																												p< 0.0001	NA	down
HMDB0034276	Amino acids, peptides, and analogues	L,L-Cyclo(leucylprolyl)
HMDB0034365	Amino acids, peptides, and analogues	L-Theanine
HMDB0061715	Amino acids, peptides, and analogues	Glutamate, gamma-methyl ester
HMDB0061890	Amino acids, peptides, and analogues	Pyroglutamylglycine
HMDB00706	Amino acids, peptides, and analogues	L-aspartyl-L-phenylalanine
HMDB0000484	Benzoic acids and derivatives	Vanillic acid
HMDB0000714	Benzoic acids and derivatives	Hippuric acid
HMDB0001870	Benzoic acids and derivatives	Benzoic acid
HMDB0032574	Benzoic acids and derivatives	Propylparaben
HMDB0240664	Benzoic acids and derivatives	Benzoylcarnitine
HMDB0000156	Beta hydroxy acids and derivatives	L-Malic acid
HMDB0000357	Beta hydroxy acids and derivatives	3-Hydroxybutyric acid
HMDB0000744	Beta hydroxy acids and derivatives	Malic acid
HMDB0000896	Bile acids and derivatives	Taurodeoxycholic acid
HMDB0000932	Bile acids and derivatives	Tauro-b-muricholic acid
NA	Bile acids and derivatives	Glycoursodeoxycholate sulfate
NA	Bile acids and derivatives	Taurochenodeoxycholic acid
145453483	Bile acids and derivatives	Taurocholenate sulfate
HMDB0000036	Bile acids and derivatives	Taurocholic acid				P<0.01	0.139522	Down																						p< 0.0001	6.07	up
HMDB0000138	Bile acids and derivatives	Glycocholic acid	P<0.01	NA	up	P<0.01	0.311366	Down																						p< 0.05	2.55	up	0.013	0.4	Down
HMDB0000518	Bile acids and derivatives	Chenodeoxycholic acid																												p< 0.0001	0.02	down
HMDB0000619	Bile acids and derivatives	Cholic acid
HMDB0000626	Bile acids and derivatives	Deoxycholic acid
HMDB0000631	Bile acids and derivatives	Glycodeoxycholic acid				P<0.01	0.736181	Down				p<0.05	30-50	Up																									P<0.05	NA	Down
HMDB0000637	Bile acids and derivatives	Glycochenodeoxycholic acid	P<0.01	1.27622	Up																									p< 0.05	1.28	up
HMDB0000708	Bile acids and derivatives	Glycoursodeoxycholic acid
HMDB0000874	Bile acids and derivatives	Tauroursodeoxycholic acid
HMDB0000946	Bile acids and derivatives	Ursodeoxycholic acid
HMDB0000951	Bile acids and derivatives	Taurochenodesoxycholic acid				P<0.01	0.288095	Down																						p< 0.0001	3.19	up							P<0.05	NA	Down
HMDB0002497	Bile acids and derivatives	3sulfo-GCDCA																																								p<0.05	NA	Down
HMDB0002580	Bile acids and derivatives	Taurolithocholate 3-sulfate
HMDB0002596	Bile acids and derivatives	Deoxycholic acid 3-glucuronide
HMDB0006898	Bile acids and derivatives	Chenodeoxyglycocholic acid
NA	Bile acids and derivatives	BCAA ( Leu +Ile +Val)/ArAA (Phe+Tyr)
NA	Bile acids and derivatives	Taurocholic acid fragment
NA	Bile acids and derivatives	TCDCA fragment
HMDB0000054	Bilirubins	Bilirubin							p<0.05	~3	Up
HMDB0001008	Bilirubins	Biliverdin							p<0.05	~10	Up
HMDB0000127	Carbohydrates and carbohydrate conjugates	D-Glucuronic acid
HMDB0000122	Carbohydrates and carbohydrate conjugates	D-Glucose
HMDB0000131	Carbohydrates and carbohydrate conjugates	Glycerol
HMDB0000139	Carbohydrates and carbohydrate conjugates	Glyceric acid
HMDB0000143	Carbohydrates and carbohydrate conjugates	D-Galactose																												p< 0.0001	NA	up
HMDB0000169	Carbohydrates and carbohydrate conjugates	D-Mannose
HMDB0000230	Carbohydrates and carbohydrate conjugates	N-Acetyl-neuraminic acid
HMDB0000247	Carbohydrates and carbohydrate conjugates	Sorbitol
HMDB0000516	Carbohydrates and carbohydrate conjugates	beta-D-Glucose
HMDB0000625	Carbohydrates and carbohydrate conjugates	Gluconic acid
HMDB0000660	Carbohydrates and carbohydrate conjugates	Fructose
HMDB0000943	Carbohydrates and carbohydrate conjugates	Threonic acid
HMDB0001266	Carbohydrates and carbohydrate conjugates	sorbose																																											0.0132	-2.4	down
HMDB0001514	Carbohydrates and carbohydrate conjugates	Glucosamine
HMDB0002545	Carbohydrates and carbohydrate conjugates	Galacturonic acid													P<0.01	0.69	Down	P<0.01	0.65	Down
HMDB0003345	Carbohydrates and carbohydrate conjugates	α-Glucose													P<0.05	0.76	Down	P<0.05	0.71	Down
HMDB0003418	Carbohydrates and carbohydrate conjugates	Tagatose
HMDB0010362	Carbohydrates and carbohydrate conjugates	6-Hydroxy-5-methoxyindole glucuronide
HMDB0029942	Carbohydrates and carbohydrate conjugates	D-Arabinose
HMDB0033704	Carbohydrates and carbohydrate conjugates	Galactopyranose													P<0.01	0.53	Down	P<0.01	0.56	Down
HMDB0034879	Carbohydrates and carbohydrate conjugates	1-[(5-Amino-5-carboxypentyl)amino]-1-deoxyfructose																												p< 0.0001	NA	up
HMDB0059998	Carbohydrates and carbohydrate conjugates	Diphenol glucuronide
HMDB0000684	Carbonyl compounds	L-Kynurenine																												p< 0.0001	NA	down
HMDB0001659	Carbonyl compounds	Acetone
HMDB0006478	Carbonyl compounds	Iso-Valeraldehyde
HMDB0013804	Carbonyl compounds	Damascenone
HMDB0001276	Carboximidic acids	N1-Acetylspermidine
HMDB0002189	Carboximidic acids	N8-Acetylspermidine
HMDB0034146	Carboximidic acids	Octadecanamide
HMDB0000142	Carboxylic acids	Formate
HMDB0001873	Carboxylic acids	Isobutyrate
HMDB0061880	Carboxylic acids	N-Acetyl-β-alanine
HMDB0002504	Ceramides	Cer(32:0;O2)										p<0.05	30-50	Up							p<0.05	NA	Up
HMDB0011764	Ceramides	Cer(38:0;O2)																			p<0.05	NA	Up
HMDB0011765	Ceramides	Cer(40:0;O2)																			p<0.05	NA	Up
Lipid	Ceramides	GalCer(36:3)
Lipid	Ceramides	galCer(36:5)
Lipid	Ceramides	LacCer(40:3)
HMDB0000567	Cinnamic acids	Cinnamic acid
HMDB0000930	Cinnamic acids	Trans-Cinnamic acid
HMDB0002040	Cinnamic acids	4-Methoxycinnamic acid
HMDB0000134	Dicarboxylic acids and derivatives	Fumaric acid
HMDB0000254	Dicarboxylic acids and derivatives	Succinic acid																												p< 0.0001	NA	up
HMDB0000691	Dicarboxylic acids and derivatives	Malonic acid
HMDB0002329	Dicarboxylic acids and derivatives	Oxalic acid																																														0.001	1.52604
HMDB0000594	Dipeptides	gamma-Glutamylphenylalanine
HMDB0006248	Dipeptides	γ -Glu-Ala
HMDB0011170	Dipeptides	gamma-Glutamylisoleucine
HMDB0011172	Dipeptides	gamma-Glutamylvaline
HMDB0011741	Dipeptides	γ -Glu-Tyr
HMDB0013302	Dipeptides	Phenylalanyl phenylalanine																												p< 0.0001	NA	down
HMDB0028680	Dipeptides	Alanylalanine
HMDB0028882	Dipeptides	L-Histidinyl-Cysteine																												p< 0.0001	NA	down
HMDB0028998	Dipeptides	Phe Ile
HMDB0029004	Dipeptides	Phenylalanyl serine
HMDB0029006	Dipeptides	Phenylalanyltryptophan
HMDB0029066	Dipeptides	Threoninyl-lysine
HMDB0029075	Dipeptides	Threoninyl-Gamma-glutamate
HMDB0029090	Dipeptides	L-Tryptophyl-L-phenylalanine																												p< 0.0001	NA	down
HMDB0029143	Dipeptides	γ -Glu-Arg
HMDB0029147	Dipeptides	γ -Glu-Gln
HMDB0029159	Dipeptides	gamma-Glutamylthreonine
HMDB0029160	Dipeptides	γ -Glu-Trp
HMDB0034367	Dipeptides	γ -Glu-Met
NA	Dipeptides	γ -Glu-Citrulline
HMDB0007028	Diradylglycerols	DG(36:0)
HMDB0007165	Diradylglycerols	DG(38:0)
HMDB0007219	Diradylglycerols	DG(36:3)
HMDB0007248	Diradylglycerols	DG(36:4)
Lipid	Diradylglycerols	DG(34:0)
Lipid	Diradylglycerols	DG(40:5)
Lipid	Diradylglycerols	DG(44:2)
5283193	Eicosanoids	5S-HEPE
86583477	Eicosanoids	9,10-EpOME
HMDB0001085	Eicosanoids	Leukotriene B4
HMDB0001139	Eicosanoids	PGF2A
HMDB0002190	Eicosanoids	5,6-EET
HMDB0002200	Eicosanoids	LTE4
HMDB0002265	Eicosanoids	14,15-DHET
HMDB0002283	Eicosanoids	14,15-EET
HMDB0002343	Eicosanoids	5,6-DHET
HMDB0002664	Eicosanoids	Prostaglandin E3
HMDB0002776	Eicosanoids	PGEM
HMDB0003252	Eicosanoids	Thromboxane B2
HMDB0003876	Eicosanoids	15-HETE
HMDB0004667	Eicosanoids	13-HODE																												p< 0.0001	NA	down
HMDB0005087	Eicosanoids	6-trans-Leukotriene B4																												p< 0.0001	NA	down
HMDB0006111	Eicosanoids	12-HETE
HMDB0010202	Eicosanoids	12-HEPE																												p< 0.0001	NA	down
HMDB0010222	Eicosanoids	9-HETE
HMDB0010223	Eicosanoids	9-HODE
HMDB0011134	Eicosanoids	5-HETE																												p< 0.0001	NA	down
HMDB0060049	Eicosanoids	4-HDoHE																												p< 0.0001	NA	down
NA	Eicosanoids	13-HODE + 9-HODE
HMDB0000888	Fatty acids and conjugates	FA(11:1)
HMDB0012328	Fatty acids and conjugates	Propyphenazon
HMDB0003229	Fatty acids and conjugates	FA(16:1)													P<0.05	1.76	Up	P<0.05	2.31	Up
HMDB0000207	Fatty acids and conjugates	FA(18:1)																																														0.041	2.96067
HMDB0000220	Fatty acids and conjugates	FA(16:0)
HMDB0000394	Fatty acids and conjugates	3-Hydroxytetradecanedioic acid
HMDB0000482	Fatty acids and conjugates	FA(8:0)																																														0.023	1.37792
HMDB0000511	Fatty acids and conjugates	FA(10:0)																																														0.009	2.07872
HMDB0000525	Fatty acids and conjugates	5-Hydroxyhexanoic acid
HMDB0000535	Fatty acids and conjugates	FA(6:0)																															0.022	0.714286	Down
HMDB0000623	Fatty acids and conjugates	FA(12:1)
HMDB0000638	Fatty acids and conjugates	FA(12:0)
HMDB0000672	Fatty acids and conjugates	FA(17:1)
HMDB0000673	Fatty acids and conjugates	FA(18:2)
HMDB0000784	Fatty acids and conjugates	Azelaic acid
HMDB0000792	Fatty acids and conjugates	FA(10:1)
HMDB0000806	Fatty acids and conjugates	FA(14:0)
HMDB0000827	Fatty acids and conjugates	FA(18:0)													P<0.01	0.68	Down	P<0.01	0.64	Down
HMDB0000847	Fatty acids and conjugates	FA(9:0)
HMDB0000872	Fatty acids and conjugates	FA(14:1)
HMDB0000892	Fatty acids and conjugates	FA(5:0)
HMDB0000933	Fatty acids and conjugates	FA(12:2)
HMDB0000944	Fatty acids and conjugates	FA(22:0)
HMDB0000947	Fatty acids and conjugates	FA(11:0)
HMDB0001160	Fatty acids and conjugates	FA(23:0)
HMDB0001388	Fatty acids and conjugates	FA(18:3)
HMDB0001999	Fatty acids and conjugates	FA(20:5)																												p< 0.0001	NA	down
HMDB0002003	Fatty acids and conjugates	FA(24:0)							p<0.05	NA	Down	p<0.05	NA	Down
HMDB0002183	Fatty acids and conjugates	FA(22:6)																												p< 0.05	NA	up
HMDB0002212	Fatty acids and conjugates	FA(20:0)
HMDB0002226	Fatty acids and conjugates	FA(22:4)
HMDB0002368	Fatty acids and conjugates	FA(24:1)							p<0.05	NA	Down	p<0.05	NA	Down
HMDB0002925	Fatty acids and conjugates	FA(20:3)
HMDB0006270	Fatty acids and conjugates	FA(18:2)
HMDB0010734	Fatty acids and conjugates	(R)-3-Hydroxy-hexadecanoic acid																												p< 0.0001	NA	up
HMDB0061864	Fatty acids and conjugates	FA(20:2)
HMDB0062659	Fatty acids and conjugates	Butyl Oleate
HMDB0062703	Fatty acids and conjugates	FA(18:1)																												p< 0.0001	NA	down
Lipid	Fatty acids and conjugates	FA(22:5)
Lipid	Fatty acids and conjugates	FA(24:2)
NA	Fatty acids and conjugates	(10E)-9-Oxo-10-hexadecenoic acid																												p< 0.0001	NA	up
NA	Fatty acids and conjugates	Oleic acid fragment
NA	Fatty acids and conjugates	FA(19:0)
NA	Fatty acids and conjugates	FA(22:7)
NA	Fatty acids and conjugates	FA(24:4)
HMDB0004362	Fatty alcohols	4-Hydroxynonenal
HMDB0062477	Fatty alcohols	2-deoxy-D-glucose
HMDB0002117	Fatty amides	Oleamide	P<0.01	3.7005	Up
HMDB0012273	Fatty amides	Palmitic amide
NA	Fatty amides	FAAD(20:1)
NA	Fatty amides	FAAD(22:2)
NA	Fatty amides	FAAD(20:0)
NA	Fatty esters	CAR(13:0)
71464497	Fatty esters	CAR(10:1)																																		P<0.01	NA	Up
71464547	Fatty esters	CAR(16:1)																												p< 0.0001	NA	up
145722200	Fatty esters	CAR(9:0)																												p< 0.0001	NA	down
HMDB0000651	Fatty esters	CAR(10:0)																												p< 0.0001	NA	down
HMDB0002250	Fatty esters	CAR(12:0)																												p< 0.05	NA	down				P<0.05	NA	Up	P<0.05	NA	Down
HMDB0005066	Fatty esters	CAR(14:0)																												p< 0.05	NA	up
HMDB0006465	Fatty esters	CAR(18:1)																												p< 0.0001	NA	up				P<0.01	NA	Down	P<0.05	NA	Down
HMDB0013326	Fatty esters	CAR(12:1)																												p< 0.05	NA	up
HMDB0061717	Fatty esters	CAR(4:1)																																		P<0.01	NA	Up
HMDB0062556	Fatty esters	CAR(4:0)																												p< 0.0001	NA	down
NA	Fatty esters	Undecanoyl-L-carnitine																												p< 0.0001	NA	down
HMDB0000062	Fatty esters	CAR(0:0)
HMDB0000201	Fatty esters	CAR(2:0)	P<0.01	2.16129	Up
HMDB0000222	Fatty esters	CAR(16:0)																												p< 0.05	NA	up
HMDB0000688	Fatty esters	CAR(5:0)
HMDB0000756	Fatty esters	CAR(6:0)
HMDB0000791	Fatty esters	CAR(8:0)																												p< 0.0001	NA	down
HMDB0000848	Fatty esters	CAR(18:0)																												p< 0.0001	NA	up
HMDB0006469	Fatty esters	CAR(18:2)																												p< 0.0001	NA	up
HMDB0013125	Fatty esters	CAR(3:0)
HMDB0013130	Fatty esters	CAR(5:1)
HMDB0013324	Fatty esters	CAR(8:1)																												p< 0.0001	NA	up
HMDB0013328	Fatty esters	CAR(7:0)
HMDB0013329	Fatty esters	CAR(14:1)																												p< 0.05	NA	up
HMDB0013331	Fatty esters	CAR(14:2)
HMDB0013334	Fatty esters	CAR(16:2)
HMDB0062725	Fatty esters	FA(20:4)													P<0.01	0.48	Down	P<0.01	0.43	Down										p< 0.05	NA	down
HMDB0041832	Flavonoid glycosides	Baicalin
HMDB0033650	Flavonoid glycosides	Estragonoside
HMDB0037359	Flavonoid glycosides	Azaleatin 3-arabinoside
HMDB0000126	Glycerophosphates	Glycerol 3-phosphate													P<0.01	0.76	Down	P<0.01	0.71	Down
HMDB0007849	Glycerophosphates	LPA(16:0)
HMDB0007851	Glycerophosphates	LPA(18:1)
HMDB11154	Glycerophosphates	LPA(O-16:1)
NA	Glycerophosphocholines	LPC(O-16:0)
NA	Glycerophosphocholines	LPC(O-18:0)
NA	Glycerophosphocholines	LPC(O-18:1)
NA	Glycerophosphocholines	PC(31:0)
NA	Glycerophosphocholines	PC(32:4)
NA	Glycerophosphocholines	PC(34:4)
NA	Glycerophosphocholines	PC(39:2)
5280646	Glycerophosphocholines	1-Linoleoyl glycerophosphochline																												p< 0.0001	NA	down
HMDB0000086	Glycerophosphocholines	Glycerophosphocholine	P<0.01	NA	Down
HMDB0000564	Glycerophosphocholines	PC(32:0)
HMDB0002815	Glycerophosphocholines	LPC(18:1)										p<0.05	0.1-0.5	Down																p< 0.0001	NA	down
HMDB0007872	Glycerophosphocholines	PC(32:1)
HMDB0007874	Glycerophosphocholines	PC(32:2)
HMDB0007881	Glycerophosphocholines	PC(34:3)
HMDB0007890	Glycerophosphocholines	PC(36:5)
HMDB0007892	Glycerophosphocholines	PC(36:6)
HMDB0007900	Glycerophosphocholines	PC(28:2)
HMDB0007937	Glycerophosphocholines	PC(33:0)																			p<0.05	NA	Down
HMDB0007971	Glycerophosphocholines	PC(34:1)
HMDB0007973	Glycerophosphocholines	PC(34:2)
HMDB0007982	Glycerophosphocholines	PC(36:4)
HMDB0007988	Glycerophosphocholines	PC(38:4)
HMDB0007991	Glycerophosphocholines	PC(38:6)
HMDB0008020	Glycerophosphocholines	PC(38:3)
HMDB0008039	Glycerophosphocholines	PC(36:2)																															1e-05	1.66667	Up
HMDB0008054	Glycerophosphocholines	PC(40:4)
HMDB0008056	Glycerophosphocholines	PC(40:5)
HMDB0008059	Glycerophosphocholines	PC(42:1)
HMDB0008090	Glycerophosphocholines	PC(40:7)																			p<0.05	NA	Down
HMDB0008156	Glycerophosphocholines	PC(40:8)
HMDB0008180	Glycerophosphocholines	PC(38:7)
HMDB0008189	Glycerophosphocholines	PC(40:9)																			p<0.05	NA	Down
HMDB0008242	Glycerophosphocholines	PC(38:5)
HMDB0008345	Glycerophosphocholines	PC(40:6)
HMDB0008428	Glycerophosphocholines	PC(35:4)
HMDB0008509	Glycerophosphocholines	PC(40:9)
HMDB0008728	Glycerophosphocholines	PC(40:7)
HMDB0010379	Glycerophosphocholines	LPC(14:0)							p<0.05	0.1-0.5	Down	p<0.05	0.1-0.5	Down
HMDB0010382	Glycerophosphocholines	LPC(16:0)										p<0.05	0.1-0.5	Down																p< 0.0001	NA	down							P<0.05	NA	Up
HMDB0010383	Glycerophosphocholines	LPC(16:1)
HMDB0010384	Glycerophosphocholines	LPC(18:0)										p<0.05	NA	down																p< 0.0001	NA	down							P<0.05	NA	Up
HMDB0010386	Glycerophosphocholines	LPC(18:2)							p<0.05	NA	down																			p< 0.0001	NA	down
HMDB0010387	Glycerophosphocholines	LPC(18:3)							p<0.05	NA	down										p<0.05	NA	Down
HMDB0010389	Glycerophosphocholines	LPC(18:4)
HMDB0010391	Glycerophosphocholines	LPC(20:1)
HMDB0010392	Glycerophosphocholines	LPC(20:2)							p<0.05	NA	down
HMDB0010393	Glycerophosphocholines	LPC(20:3)							p<0.05	0.1-0.5	Down	p<0.05	0.1-0.5	Down																p< 0.0001	NA	down
HMDB0010395	Glycerophosphocholines	LPC(20:4)										p<0.05	0.1-0.5	Down																p< 0.0001	NA	down
HMDB0010397	Glycerophosphocholines	LPC(20:5)										p<0.05	0.1-0.5	Down							p<0.05	NA	Down
HMDB0010398	Glycerophosphocholines	LPC(22:0)
HMDB0010405	Glycerophosphocholines	LPC(24:0)							p<0.05	NA	up
HMDB0010407	Glycerophosphocholines	LPC(P-16:0)																												p< 0.0001	NA	down
HMDB0012108	Glycerophosphocholines	LPC(17:0)				P<0.05	1.28203	Up																						p< 0.0001	NA	down							P<0.05	NA	Up
HMDB0013122	Glycerophosphocholines	LPC(P-18:0)																												p< 0.0001	NA	down
HMDB0013412	Glycerophosphocholines	PC(O-34:1)
HMDB0252858	Glycerophosphocholines	Glycerol-3-phosphocholine
Lipid	Glycerophosphocholines	LPC 20:2
Lipid	Glycerophosphocholines	LPC 22:5
Lipid	Glycerophosphocholines	LPC(15:0)
Lipid	Glycerophosphocholines	LPC(17:1)
Lipid	Glycerophosphocholines	LPC(22:5)
Lipid	Glycerophosphocholines	LPC(22:6)							p<0.05	0.1-0.5	Down										p<0.05	NA	Down							p< 0.0001	NA	down
Lipid	Glycerophosphocholines	LPC(O-18:2)
Lipid	Glycerophosphocholines	PC(15:0)																												p< 0.0001	NA	down
Lipid	Glycerophosphocholines	PC(16:0)																												p< 0.0001	NA	down
Lipid	Glycerophosphocholines	PC(18:1)																												p< 0.0001	NA	down
Lipid	Glycerophosphocholines	PC(30:5)
Lipid	Glycerophosphocholines	PC(8:0)
Lipid	Glycerophosphocholines	PC(O-18:0)																												p< 0.0001	NA	down
Lipid	Glycerophosphocholines	PC(O-30:2)																												p< 0.0001	NA	down
Lipid	Glycerophosphocholines	PC(O-40:7)
NA	Glycerophosphocholines	LPC(12:0)
9547071	Glycerophosphoethanolamines	LPE(18:1)
HMDB0008826	Glycerophosphoethanolamines	PE(32:0)
HMDB0008866	Glycerophosphoethanolamines	PE(34:1)
HMDB0009071	Glycerophosphoethanolamines	PE(38:6)																			p<0.05	NA	down
HMDB0009205	Glycerophosphoethanolamines	PE(40:5)
HMDB0009234	Glycerophosphoethanolamines	PE(40:4)																												p< 0.0001	NA	down
HMDB0009331	Glycerophosphoethanolamines	PE(40:6)																			p<0.05	NA	down
HMDB0009418	Glycerophosphoethanolamines	PE(36:4)																			p<0.05	NA	Down
HMDB0011129	Glycerophosphoethanolamines	LPE(18:0)																												p< 0.05	NA	down							P<0.05	NA	Up
HMDB0011358	Glycerophosphoethanolamines	PE(O-38:5)																			p<0.05	NA	Down
HMDB0011473	Glycerophosphoethanolamines	LPE(P-16:0)
HMDB0011482	Glycerophosphoethanolamines	LPE(20:1)
HMDB0011487	Glycerophosphoethanolamines	LPE(20:4)																																					P<0.05	NA	Up
HMDB0011503	Glycerophosphoethanolamines	LPE(16:0)							p<0.05	NA	down																												P<0.05	NA	Up
HMDB0011507	Glycerophosphoethanolamines	LPE(18:2)																												p< 0.0001	NA	down
HMDB0011513	Glycerophosphoethanolamines	LPE(20:2)																												p< 0.0001	NA	down
HMDB0011519	Glycerophosphoethanolamines	LPE(20:5)
HMDB0011526	Glycerophosphoethanolamines	LPE (22:6)																																					P<0.05	NA	Up
Lipid	Glycerophosphoethanolamines	PE(O-16:1)																												p< 0.0001	NA	down
Lipid	Glycerophosphoethanolamines	PE(O-18:1)																												p< 0.0001	NA	down
Lipid	Glycerophosphoethanolamines	PE(O-36:4)
Lipid	Glycerophosphoethanolamines	PE(O-36:5)																			p<0.05	NA	Down	p<0.05	NA	Down	p<0.05	NA	Down
Lipid	Glycerophosphoethanolamines	PE(O-38:3)
Lipid	Glycerophosphoethanolamines	PE(O-38:4)
Lipid	Glycerophosphoethanolamines	PE(O-38:7)																			p<0.05	NA	Down
Lipid	Glycerophosphoethanolamines	PE(O-40:7)																			p<0.05	NA	Down	p<0.05	NA	Down	p<0.05	NA	Down
Lipid	Glycerophosphoethanolamines	PE(O-40:8)																			p<0.05	NA	Down
NA	Glycerophosphoethanolamines	PE(38:4)
NA	Glycerophosphoethanolamines	LPE(16:1)
NA	Glycerophosphoethanolamines	LPE(22:4)
Lipid	Glycerophosphoglycerols	PG(O-31:2)																												p< 0.0001	NA	up
HMDB0009789	Glycerophosphoinositols	PI(36:4)																			p<0.05	NA	Up
Lipid	Glycerophosphoinositols	LPI(16:0)
HMDB0002035	Hydroxycinnamic acids and derivatives	Hydroxycinnamic acid
HMDB0002511	Hydroxycinnamic acids and derivatives	Trimethoxycinnamic acid
HMDB0000197	Indolyl carboxylic acids and derivatives	indole-3-acetic acid
HMDB0000671	Indolyl carboxylic acids and derivatives	Indolelactic acid																												p< 0.0001	NA	down
HMDB0000929	Indolyl carboxylic acids and derivatives	L-Tryptophan																												p< 0.0001	NA	down
HMDB0002302	Indolyl carboxylic acids and derivatives	3-Indolepropionic acid
HMDB0004096	Indolyl carboxylic acids and derivatives	5-Methoxyindoleacetate
HMDB0000350	Medium-chain hydroxy acids and derivatives	3-Hydroxysebacic acid
HMDB0000413	Medium-chain hydroxy acids and derivatives	3-Hydroxydodecanedioic acid
HMDB0002203	Medium-chain hydroxy acids and derivatives	3-Hydroxycapric acid																															0.031	0.714286	Down
HMDB0061914	Medium-chain hydroxy acids and derivatives	8-Hydroxyoctanoate
3037151	Others	Hirsuteine
HMDB0001859	Others	Paracetamol
HMDB0004666	Others	2-Arachidonoylglycerol
HMDB0006240	Others	Edaravone
HMDB0034854	Others	Flumioxazin
16632	Others	Benzoylcholine
439176	Others	5'-S-Methylthioadenosine
11051218	Others	1,1'-[1,12-Dodecanediylbis(oxy)]bisbenzene
71684356	Others	N-Arachidonoyl-3-hydroxy-.gamma.-aminobutyric acid
131858799	Others	Lovastatin hydroxy acid
HMDB0000244	Others	(-)-Riboflavin
HMDB0011749	Others	2-Piperidinone
HMDB0029843	Others	Glycyrrhizin
HMDB0059933	Others	p-Toluenesulfonic acid
Lipid	Others	MGDG 15:1
NA	Others	2,4-Thiazolidinedione, 5-[[4-[2-[5-(1-hydroxyethyl)-2-pyridinyl]ethoxy]phenyl]methyl]-
NA	Others	4-Isoxazolepropanoic acid, .alpha.-amino-2,3-dihydro-5-methyl-3-oxo-
NA	Others	MG(16:0)
NA	Others	Mesterolone
70	Others	4-Methyl-2-oxovaleric acid
111	Others	N-Carbamoyl β-alanine
175	Others	Acetate
10787	Others	Trihydroxybenzene
14891	Others	10-undecenoate
69492	Others	Myristamide	P<0.01	1.20362	Up
75323	Others	Hydroxypurine
91541	Others	5-Hydroxymethyl-2′-deoxyuridine
137860	Others	6-Methylnicotinic acid
151491	Others	3-(1-pyrazolyl)-L-alanine
439194	Others	2,3-dihydroxyl-propanoic acid
442106	Others	Hypaphorine
536124	Others	3,4-Dihydroxydihydrofuran-2(3H)-one
3036452	Others	6-Hydroxymelatonin glucuronide
139292027	Others	N-fructosyl tyrosine
HMDB0000044	Others	Ascorbic acid
HMDB0000085	Others	2-Deoxyguanosine
HMDB0000097	Others	Choline
HMDB0000149	Others	Ethanolamine
HMDB0000208	Others	Alpha-Ketoglutaric acid
HMDB0000223	Others	Oxalacetic acid
HMDB0000243	Others	Pyruvic acid
HMDB0000251	Others	Taurine																												p< 0.0001	NA	up
HMDB0000294	Others	Urea
HMDB0000472	Others	5-Hydroxy-L-tryptophan
HMDB0000682	Others	Indoxyl sulfate																												p< 0.0001	NA	dowm
HMDB0000715	Others	Kynurenic acid
HMDB0000755	Others	p-Hydroxyphenyllactic acid
HMDB0000761	Others	Lithocholic acid
HMDB0000925	Others	Trimethylamine N-oxide
HMDB0001250	Others	Acetylarylamine
HMDB0001429	Others	Phosphoric acid
HMDB0001541	Others	Guanosine hexaphosphate adenosine
HMDB0002224	Others	5-Methyldeoxycytidine
HMDB0005785	Others	Indole-3-carbinol
HMDB0012275	Others	Phenylethylamine
HMDB0028922	Others	Leucylalanine
HMDB0030286	Others	Coreximine
HMDB0034301	Others	Piperidine
HMDB0060772	Others	4'-Hydroxyfenoprofen glucuronide
HMDB0240740 (HMDB0061933)	Others	Isatin
NA	Others	TCDCA/GCDCA ratio
NA	Others	TDCA/GDCA ratio
NA	Others	DSGEGDFXAEGGGVR
NA	Others	2-Oleoylglycerophosphoethanolamine
NA	Others	4-ketoglucose
NA	Others	ADSGEGDFXAEGGGVR
NA	Others	Arachidonyl lysolecithin																															2.8e-06	2.32558	Up
NA	Others	Bilirubin isomer 1
NA	Others	Bilirubin isomer 2
NA	Others	Cotinine/serotonin
NA	Others	Creatine/beatain
NA	Others	Hydroxypa Imitate
NA	Others	Hypoxanthine fragment
NA	Others	l-Acetylcarnitine fragment
NA	Others	Methyl lucopyranoside
NA	Others	pyroglutamic acid/glutamic acid
NA	Others	dimethyl sulfone
NA	Others	Serotonin
NA	Others	Eicosenoic acid
NA	Phosphosphingolipids	SM(18:1;O2)
NA	Phosphosphingolipids	SM(18:2)
HMDB0001348	Phosphosphingolipids	SM(36:1;O2)
HMDB0011697	Phosphosphingolipids	SM(42:1;O2)																			p<0.05	NA	Down
HMDB0012102	Phosphosphingolipids	SM(38:1;O2)
HMDB0012103	Phosphosphingolipids	SM(40:1;O2)
HMDB0012105	Phosphosphingolipids	SM(41:1;O2)
HMDB0012237	Phosphosphingolipids	Inositol-P-ceramide
Lipid	Phosphosphingolipids	SM(24:1)
Lipid	Phosphosphingolipids	SM(36:2)
Lipid	Phosphosphingolipids	SM(36:2;O2)
Lipid	Phosphosphingolipids	SM(38:2;O2)
Lipid	Phosphosphingolipids	SM(39:1)
Lipid	Phosphosphingolipids	SM(40:2;O2)
Lipid	Phosphosphingolipids	SM(41:2;O2)
Lipid	Phosphosphingolipids	SM(42:3;O2)
HMDB0000133	Purine nucleosides	Guanosine
HMDB0000195	Purine nucleosides	Inosine
HMDB0000299	Purine nucleosides	Xanthosine
HMDB0000912	Purine nucleosides	Succinyladenosine
HMDB0001563	Purine nucleosides	1-Methylguanosine
HMDB0002721	Purine nucleosides	1-Methylinosine
HMDB0003331	Purine nucleosides	1-Methyladenosine
HMDB0004824	Purine nucleosides	N2,N2-Dimethylguanosine
HMDB0000034	Purines and purine derivatives	Adenine
HMDB0000132	Purines and purine derivatives	Guanine
HMDB0000157	Purines and purine derivatives	Hypoxanthine
HMDB0000289	Purines and purine derivatives	Uric acid
HMDB0000292	Purines and purine derivatives	Xanthine																															0.0052	0.769231	Down
HMDB0000897	Purines and purine derivatives	7-Methylguanine
HMDB0001366	Purines and purine derivatives	Purine
HMDB0001847	Purines and purine derivatives	Caffeine
HMDB0000089	Pyrimidine nucleosides	Cytidine
HMDB0000296	Pyrimidine nucleosides	Uridine																												p< 0.0001	NA	up
HMDB0031642	Pyrrolidines	N-Nitroso-pyrrolidine
HMDB0034587	Pyrrolidines	1-Pyrrolidinecarboxaldehyde
HMDB0002039	Pyrrolidines	2-Pyrrolidinone
HMDB0031641	Pyrrolidines	Pyrrolidine
HMDB0000305	Quinones and hydroquinones	Retinol
HMDB0001893	Quinones and hydroquinones	Alpha-Tocopherol																																											0.0012	1.5	up
HMDB0006254	Quinones and hydroquinones	4-Hydroxyretinoic acid
HMDB0000252	Sphingoid bases	Sphingosine
HMDB0000277	Sphingoid bases	Sphingosine-1-phosphate				P<0.01	1.19393	Up
HMDB0004610	Sphingoid bases	Phytosphingosine
Lipid	Sphingoid bases	C16 Sphinganine
NA	Sterols	Aldosterone
HMDB0000063	Sterols	Cortisol
HMDB0000067	Sterols	Cholesterol																p<0.05	0.81	down																									0.0355	1.1	up
HMDB0000077	Sterols	Dehydroepiandrosterone																												p< 0.0001	NA	down
HMDB0000610	Sterols	CE(18:2)
HMDB0000885	Sterols	CE(16:0)
HMDB0000918	Sterols	CE(18:1)																			p<0.05	NA	Down
HMDB0001032	Sterols	Dehydroepiandrosterone sulfate
HMDB0001993	Sterols	7a-Hydroxy-cholestene-3-one																												p< 0.0001	NA	down
HMDB0002759	Sterols	Androsterone sulfate
HMDB0003180	Sterols	Cortol
HMDB0004031	Sterols	11b-Hydroxyprogesterone
HMDB0006733	Sterols	CE(22:6)																			p<0.05	NA	Down
HMDB0006890	Sterols	3a,6a,7a,12a-Tetrahydroxy-45 b -cholan-24-oic Acid
HMDB0006894	Sterols	3α,7α-Dihydroxy-5beta-cholestan-26-al																												p< 0.0001	NA	up
HMDB0010371	Sterols	CE(20:4)
Lipid	Sterols	CE(18:3)
NA	Sterols	3β, 6β-Dihydroxy-5β-cholan-24-oic acid																																								p<0.05	NA	Down
NA	Sterols	Dihydrocholesterol
HMDB0000072	Tricarboxylic acids and derivatives	Aconitic acid
HMDB0000094	Tricarboxylic acids and derivatives	Citric acid																												p< 0.0001	NA	up													0.007	-1.1	down
HMDB0005356	Triradylglycerols	TG(48:0)																			p<0.05	NA	Down
HMDB0005357	Triradylglycerols	TG(50:0)																			p<0.05	NA	Down
HMDB0005358	Triradylglycerols	TG(52:0)																			p<0.05	NA	Down
HMDB0005359	Triradylglycerols	TG(48:1)																			p<0.05	NA	Down
HMDB0005361	Triradylglycerols	TG(52:1)																			p<0.05	NA	Down
HMDB0005370	Triradylglycerols	TG(54:4)
HMDB0005376	Triradylglycerols	TG(48:2)																			p<0.05	NA	Down
HMDB0005384	Triradylglycerols	TG(52:3)
HMDB0005432	Triradylglycerols	TG(48:3)																			p<0.05	NA	Down
HMDB0010411	Triradylglycerols	TG(46:0)																			p<0.05	NA	Down
HMDB0010412	Triradylglycerols	TG(46:1)																			p<0.05	NA	Down
HMDB0010419	Triradylglycerols	TG(46:2)																			p<0.05	NA	Down
HMDB0010525	Triradylglycerols	TG(60:10)																			p<0.05	NA	Down
HMDB0011705	Triradylglycerols	TG(49:1)																			p<0.05	NA	Down
Lipid	Triradylglycerols	TG(44:1)																			p<0.05	NA	Down
Lipid	Triradylglycerols	TG(46:3)																			p<0.05	NA	Down
Lipid	Triradylglycerols	TG(47:0)																			p<0.05	NA	Down
Lipid	Triradylglycerols	TG(49:0)																			p<0.05	NA	Down
Lipid	Triradylglycerols	TG(50:2)
Lipid	Triradylglycerols	TG(50:4)
Lipid	Triradylglycerols	TG(51:1)																			p<0.05	NA	Down
Lipid	Triradylglycerols	TG(51:3)
Lipid	Triradylglycerols	TG(51:4)
Lipid	Triradylglycerols	TG(52:4)
Lipid	Triradylglycerols	TG(52:5)
Lipid	Triradylglycerols	TG(52:6)
Lipid	Triradylglycerols	TG(53:1)																			p<0.05	NA	Down
Lipid	Triradylglycerols	TG(53:3)
Lipid	Triradylglycerols	TG(53:4)
Lipid	Triradylglycerols	TG(54:7)
Lipid	Triradylglycerols	TG(56:5)
Lipid	Triradylglycerols	TG(56:6)
Lipid	Triradylglycerols	TG(56:7)
Lipid	Triradylglycerols	TG(56:9)
Lipid	Triradylglycerols	TG(60:2)
NA	Triradylglycerols	TG(53:2)																			p<0.05	NA	Down
[truncated: 214 more columns]

## Sheet: Table S3
Table S3A. Vote counting result of HCC vs. Control													Table S3B. Vote counting result of HCC vs. LC													Table S3C. Vote counting result of LC vs. Control
Metabolite	votes_met	articles_met	vote_counting_met	Sign test (two-sided)_met	FDR_met	Lipid	votes_lip	articles_lip	vote_counting_lip	Sign test (two-sided)_lip	FDR_lip		Metabolite	votes_met	articles_met	vote_counting_met	Sign test (two-sided)_met	FDR_met	Lipid	votes_lip	articles_lip	vote_counting_lip	Sign test (two-sided)_lip	FDR_lip		Metabolite	votes_met	articles_met	vote_counting_met	Sign test (two-sided)_met	FDR_met	Lipid	votes_lip	articles_lip	vote_counting_lip	Sign test (two-sided)_lip	FDR_lip
L-Phenylalanine	6	14	0.428571	0.1796	0.5388	LPC(16:0)	-12	12	-1	0.0004	0.0052		L-Glutamic acid	7	7	1	0.0156	0.0312	FA(18:2)	4	6	0.666667	0.2188	Not applicable		L-Phenylalanine	5	9	0.555556	0.1796	0.36	FA(18:2)	1	5	0.2	1	Not applicable
L-Tyrosine	7	13	0.538462	0.0922	0.8298	Glycocholic acid	13	15	0.866667	0.001	0.0065		L-Phenylalanine	-1	7	-0.142857	1	1	LPC(18:0)	1	5	0.2	1	Not applicable		L-Serine	0	6	0	1	1	FA(20:4)	-1	5	-0.2	1	Not applicable
L-Leucine	0	8	0	1	1	LPC(18:0)	-11	11	-1	0.001	0.00433333		L-Serine	3	5	0.6	Not applicable	Not applicable	CAR(2:0)	2	4	0.5	Not applicable	Not applicable		L-Tyrosine	4	6	0.666667	0.2188	Not applicable	FA(18:0)	2	4	0.5	Not applicable	Not applicable
L-Serine	0	8	0	1	1	Glycochenodeoxycholic acid	9	9	1	0.004	0.013		L-Valine	5	5	1	Not applicable	Not applicable	FA(18:1)	4	4	1	Not applicable	Not applicable		L-Glutamic acid	-3	5	-0.6	0.375	Not applicable	Glycochenodeoxycholic acid	4	4	1	Not applicable	Not applicable
L-Tryptophan	-5	7	-0.714286	0.125	0.5625	LPC(18:1)	-9	9	-1	0.004	0.0104		L-Isoleucine	2	4	0.5	Not applicable	Not applicable	Glycocholic acid	-4	4	-1	Not applicable	Not applicable		L-Methionine	4	4	1	Not applicable	Not applicable	Glycocholic acid	4	4	1	Not applicable	Not applicable
L-Glutamic acid	3	7	0.428571	0.4532	1	LPC(20:4)	-9	9	-1	0.004	0.00866667		L-Methionine	0	4	0	Not applicable	Not applicable	LPC(16:0)	2	4	0.5	Not applicable	Not applicable		Bilirubin	3	3	1	Not applicable	Not applicable	CAR(2:0)	3	3	1	Not applicable	Not applicable
L-Proline	3	7	0.428571	0.4532	0.81576	LPC(18:2)	-10	12	-0.833333	0.0064	0.0118857		L-Proline	0	4	0	Not applicable	Not applicable	LPC(18:2)	-4	4	-1	Not applicable	Not applicable		Glycine	-1	3	-0.333333	Not applicable	Not applicable	FA(16:1)	3	3	1	Not applicable	Not applicable
Ornithine	2	6	0.333333	0.6876	1	LPC(14:0)	-8	8	-1	0.0078	0.012675		L-Tyrosine	-2	4	-0.5	Not applicable	Not applicable	CAR(0:0)	3	3	1	Not applicable	Not applicable		L-Aspartic acid	-1	3	-0.333333	Not applicable	Not applicable	FA(18:1)	3	3	1	Not applicable	Not applicable
Taurine	-2	6	-0.333333	0.6876	0.884057	LPC(20:3)	-7	7	-1	0.0156	0.0225333		1-Methyladenosine	3	3	1	Not applicable	Not applicable	CAR(18:1)	-1	3	-0.333333	Not applicable	Not applicable		L-Proline	-1	3	-0.333333	Not applicable	Not applicable	LPC(16:0)	-3	3	-1	Not applicable	Not applicable
Creatine	-1	5	-0.2	Not applicable	Not applicable	LPC(20:5)	-7	7	-1	0.0156	0.02028		2-Hydroxybutyric acid	3	3	1	Not applicable	Not applicable	FA(18:3)	1	3	0.333333	Not applicable	Not applicable		Ornithine	3	3	1	Not applicable	Not applicable	LPC(18:0)	-3	3	-1	Not applicable	Not applicable
Creatinine	-3	5	-0.6	Not applicable	Not applicable	LPC(22:6)	-7	7	-1	0.0156	0.0184364		Citric acid	-1	3	-0.333333	Not applicable	Not applicable	FA(20:4)	1	3	0.333333	Not applicable	Not applicable		Azelaic acid	0	2	0	Not applicable	Not applicable	LPC(18:2)	-3	3	-1	Not applicable	Not applicable
L-Alanine	1	5	0.2	Not applicable	Not applicable	Taurocholic acid	6	6	1	0.0312	0.0338		Creatine	1	3	0.333333	Not applicable	Not applicable	LPE(16:0)	1	3	0.333333	Not applicable	Not applicable		Citric acid	2	2	1	Not applicable	Not applicable	LPC(22:6)	-3	3	-1	Not applicable	Not applicable
L-Methionine	3	5	0.6	Not applicable	Not applicable	CAR(10:0)	-6	6	-1	0.0312	0.0312		Glycerol	-1	3	-0.333333	Not applicable	Not applicable	15-HETE	2	2	1	Not applicable	Not applicable		gamma-Glutamylphenylalanine	0	2	0	Not applicable	Not applicable	12-HETE	0	2	0	Not applicable	Not applicable
Uric acid	1	5	0.2	Not applicable	Not applicable	CAR(18:1)	5	5	1	Not applicable	Not applicable		Glycine	1	3	0.333333	Not applicable	Not applicable	Alpha-Tocopherol	2	2	1	Not applicable	Not applicable		gamma-Glutamylthreonine	0	2	0	Not applicable	Not applicable	15-HETE	0	2	0	Not applicable	Not applicable
D-Glucose	0	4	0	Not applicable	Not applicable	PC(32:1)	5	5	1	Not applicable	Not applicable		Hypoxanthine	3	3	1	Not applicable	Not applicable	CAR(12:0)	0	2	0	Not applicable	Not applicable		gamma-Glutamylvaline	0	2	0	Not applicable	Not applicable	CAR(0:0)	0	2	0	Not applicable	Not applicable
Glycerol	-2	4	-0.5	Not applicable	Not applicable	LPC(17:0)	-5	5	-1	Not applicable	Not applicable		L-Alanine	3	3	1	Not applicable	Not applicable	CAR(4:1)	2	2	1	Not applicable	Not applicable		Hypoxanthine	-2	2	-1	Not applicable	Not applicable	CAR(10:0)	-2	2	-1	Not applicable	Not applicable
Hypoxanthine	0	4	0	Not applicable	Not applicable	PC(38:6)	-5	5	-1	Not applicable	Not applicable		L-Aspartic acid	3	3	1	Not applicable	Not applicable	FA(10:0)	2	2	1	Not applicable	Not applicable		L-Histidine	0	2	0	Not applicable	Not applicable	CAR(18:1)	0	2	0	Not applicable	Not applicable
L-Aspartic acid	-2	4	-0.5	Not applicable	Not applicable	FA(18:1)	4	6	0.666667	Not applicable	Not applicable		Ornithine	3	3	1	Not applicable	Not applicable	FA(11:1)	0	2	0	Not applicable	Not applicable		L-Tryptophan	0	2	0	Not applicable	Not applicable	CAR(8:0)	0	2	0	Not applicable	Not applicable
L-Isoleucine	-2	4	-0.5	Not applicable	Not applicable	FA(18:2)	4	6	0.666667	Not applicable	Not applicable		Uric acid	-1	3	-0.333333	Not applicable	Not applicable	FA(24:0)	-2	2	-1	Not applicable	Not applicable		Malic acid	2	2	1	Not applicable	Not applicable	Cholesterol	0	2	0	Not applicable	Not applicable
L-Valine	-2	4	-0.5	Not applicable	Not applicable	CAR(2:0)	3	5	0.6	Not applicable	Not applicable		Xanthine	-1	3	-0.333333	Not applicable	Not applicable	FA(5:0)	0	2	0	Not applicable	Not applicable		Succinic acid	2	2	1	Not applicable	Not applicable	FA(16:0)	2	2	1	Not applicable	Not applicable
Myo-inositol	-2	4	-0.5	Not applicable	Not applicable	CAR(8:0)	-3	5	-0.6	Not applicable	Not applicable		3-Hydroxybutyric acid	2	2	1	Not applicable	Not applicable	Glycochenodeoxycholic acid	-2	2	-1	Not applicable	Not applicable		?-Glucose	-1	1	-1	Not applicable	Not applicable	FA(20:2)	2	2	1	Not applicable	Not applicable
oxoproline	0	4	0	Not applicable	Not applicable	FA(20:4)	0	8	0	Not applicable	Not applicable		3-Hydroxycapric acid	0	2	0	Not applicable	Not applicable	Glycodeoxycholic acid	-2	2	-1	Not applicable	Not applicable		? -Glu-Ala	1	1	1	Not applicable	Not applicable	Glycodeoxycholic acid	2	2	1	Not applicable	Not applicable
Phenylalanyl phenylalanine	-4	4	-1	Not applicable	Not applicable	CAR(16:1)	4	4	1	Not applicable	Not applicable		Aconitic acid	-2	2	-1	Not applicable	Not applicable	LPC(14:0)	-2	2	-1	Not applicable	Not applicable		? -Glu-Arg	1	1	1	Not applicable	Not applicable	LPC(14:0)	-2	2	-1	Not applicable	Not applicable
Uridine	0	4	0	Not applicable	Not applicable	CAR(18:2)	4	4	1	Not applicable	Not applicable		Bilirubin	0	2	0	Not applicable	Not applicable	LPC(17:0)	2	2	1	Not applicable	Not applicable		? -Glu-Citrulline	1	1	1	Not applicable	Not applicable	LPC(18:1)	0	2	0	Not applicable	Not applicable
3-Hydroxybutyric acid	3	3	1	Not applicable	Not applicable	FA(16:1)	4	4	1	Not applicable	Not applicable		Choline	0	2	0	Not applicable	Not applicable	LPC(18:1)	0	2	0	Not applicable	Not applicable		? -Glu-Gln	1	1	1	Not applicable	Not applicable	LPC(20:4)	-2	2	-1	Not applicable	Not applicable
Azelaic acid	-1	3	-0.333333	Not applicable	Not applicable	PC(32:0)	4	4	1	Not applicable	Not applicable		D-Galactose	-2	2	-1	Not applicable	Not applicable	LPC(20:3)	-2	2	-1	Not applicable	Not applicable		? -Glu-Met	1	1	1	Not applicable	Not applicable	LPC(20:5)	-2	2	-1	Not applicable	Not applicable
Bilirubin	3	3	1	Not applicable	Not applicable	Taurochenodesoxycholic acid	4	4	1	Not applicable	Not applicable		D-Glucose	-2	2	-1	Not applicable	Not applicable	LPC(20:5)	-2	2	-1	Not applicable	Not applicable		? -Glu-Trp	1	1	1	Not applicable	Not applicable	PC(36:2)	-2	2	-1	Not applicable	Not applicable
Citric acid	3	3	1	Not applicable	Not applicable	FA(22:6)	2	4	0.5	Not applicable	Not applicable		D-Lactic acid	0	2	0	Not applicable	Not applicable	LPC(24:0)	0	2	0	Not applicable	Not applicable		? -Glu-Tyr	1	1	1	Not applicable	Not applicable	PC(36:4)	-2	2	-1	Not applicable	Not applicable
D-Galactose	-1	3	-0.333333	Not applicable	Not applicable	CAR(16:0)	0	4	0	Not applicable	Not applicable		Isobutyrate	0	2	0	Not applicable	Not applicable	LPE(18:0)	2	2	1	Not applicable	Not applicable		1-Methyladenosine	1	1	1	Not applicable	Not applicable	PC(38:5)	0	2	0	Not applicable	Not applicable
D-Lactic acid	3	3	1	Not applicable	Not applicable	Oleamide	0	4	0	Not applicable	Not applicable		Kynurenic acid	0	2	0	Not applicable	Not applicable	LPE(18:1)	0	2	0	Not applicable	Not applicable		1,2-propanediol	1	1	1	Not applicable	Not applicable	PC(38:6)	-2	2	-1	Not applicable	Not applicable
Fumaric acid	1	3	0.333333	Not applicable	Not applicable	PE(38:6)	0	4	0	Not applicable	Not applicable		L-Arginine	-2	2	-1	Not applicable	Not applicable	PC(36:2)	2	2	1	Not applicable	Not applicable		2-deoxy-D-glucose	-1	1	-1	Not applicable	Not applicable	10-undecenoate	1	1	1	Not applicable	Not applicable
Glycine	-3	3	-1	Not applicable	Not applicable	FA(20:5)	-2	4	-0.5	Not applicable	Not applicable		L-Asparagine	0	2	0	Not applicable	Not applicable	Taurochenodesoxycholic acid	-2	2	-1	Not applicable	Not applicable		2-Hydroxybutyric acid	-1	1	-1	Not applicable	Not applicable	13-HODE + 9-HODE	-1	1	-1	Not applicable	Not applicable
L-Arginine	-1	3	-0.333333	Not applicable	Not applicable	LPC(15:0)	-4	4	-1	Not applicable	Not applicable		L-Glutamine	-2	2	-1	Not applicable	Not applicable	Taurocholic acid	-2	2	-1	Not applicable	Not applicable		2-Pyrrolidinone	1	1	1	Not applicable	Not applicable	14,15-DHET	1	1	1	Not applicable	Not applicable
L-Asparagine	-1	3	-0.333333	Not applicable	Not applicable	LPC(18:3)	-4	4	-1	Not applicable	Not applicable		L-Leucine	2	2	1	Not applicable	Not applicable	12-HETE	1	1	1	Not applicable	Not applicable		3-Hydroxycapric acid	1	1	1	Not applicable	Not applicable	14,15-EET	1	1	1	Not applicable	Not applicable
L-Glutamine	-3	3	-1	Not applicable	Not applicable	Glycodeoxycholic acid	3	3	1	Not applicable	Not applicable		L-Threonine	0	2	0	Not applicable	Not applicable	13-HODE + 9-HODE	1	1	1	Not applicable	Not applicable		5-Methoxyindoleacetate	-1	1	-1	Not applicable	Not applicable	2-Oleoylglycerophosphoethanolamine	-1	1	-1	Not applicable	Not applicable
L-Histidine	1	3	0.333333	Not applicable	Not applicable	Tauroursodeoxycholic acid	3	3	1	Not applicable	Not applicable		Octadecanamide	2	2	1	Not applicable	Not applicable	2-Arachidonoylglycerol	-1	1	-1	Not applicable	Not applicable		6-Methylnicotinic acid	-1	1	-1	Not applicable	Not applicable	3a,6a,7a,12a-Tetrahydroxy-45 b -cholan-24-oic Acid	-1	1	-1	Not applicable	Not applicable
L-Lysine	-3	3	-1	Not applicable	Not applicable	CAR(0:0)	1	3	0.333333	Not applicable	Not applicable		oxoproline	0	2	0	Not applicable	Not applicable	2-Oleoylglycerophosphoethanolamine	1	1	1	Not applicable	Not applicable		8-Hydroxyoctanoate	1	1	1	Not applicable	Not applicable	5-HETE	1	1	1	Not applicable	Not applicable
L-Threonine	1	3	0.333333	Not applicable	Not applicable	FA(18:0)	1	3	0.333333	Not applicable	Not applicable		Phenylalanyl serine	-2	2	-1	Not applicable	Not applicable	3?, 6?-Dihydroxy-5?-cholan-24-oic acid	-1	1	-1	Not applicable	Not applicable		Acetylarylamine	1	1	1	Not applicable	Not applicable	5,6-DHET	1	1	1	Not applicable	Not applicable
Succinic acid	3	3	1	Not applicable	Not applicable	FA(18:3)	1	3	0.333333	Not applicable	Not applicable		Phenylalanyltryptophan	-2	2	-1	Not applicable	Not applicable	3a,6a,7a,12a-Tetrahydroxy-45 b -cholan-24-oic Acid	1	1	1	Not applicable	Not applicable		Acetylglycine	-1	1	-1	Not applicable	Not applicable	5,6-EET	1	1	1	Not applicable	Not applicable
?-Glucose	-2	2	-1	Not applicable	Not applicable	FA(22:5)	1	3	0.333333	Not applicable	Not applicable		Uridine	2	2	1	Not applicable	Not applicable	3sulfo-GCDCA	-1	1	-1	Not applicable	Not applicable		Adenine	1	1	1	Not applicable	Not applicable	9-HETE	1	1	1	Not applicable	Not applicable
1-Methyladenosine	2	2	1	Not applicable	Not applicable	CAR(12:0)	-1	3	-0.333333	Not applicable	Not applicable		(-)-Riboflavin	1	1	1	Not applicable	Not applicable	5-HETE	1	1	1	Not applicable	Not applicable		ADSGEGDFXAEGGGVR	1	1	1	Not applicable	Not applicable	9,10-EpOME	1	1	1	Not applicable	Not applicable
1,2-propanediol	2	2	1	Not applicable	Not applicable	FA(24:1)	-1	3	-0.333333	Not applicable	Not applicable		1-Methylguanosine	-1	1	-1	Not applicable	Not applicable	5S-HEPE	1	1	1	Not applicable	Not applicable		Alanylalanine	-1	1	-1	Not applicable	Not applicable	C16 Sphinganine	1	1	1	Not applicable	Not applicable
2-Hydroxybutyric acid	2	2	1	Not applicable	Not applicable	Androsterone sulfate	-3	3	-1	Not applicable	Not applicable		1-Methylinosine	-1	1	-1	Not applicable	Not applicable	Butyl Oleate	1	1	1	Not applicable	Not applicable		Alpha-CEHC	1	1	1	Not applicable	Not applicable	CAR(10:1)	-1	1	-1	Not applicable	Not applicable
Biliverdin	2	2	1	Not applicable	Not applicable	CAR(10:1)	-3	3	-1	Not applicable	Not applicable		1-Pyrrolidinecarboxaldehyde	1	1	1	Not applicable	Not applicable	C16 Sphinganine	-1	1	-1	Not applicable	Not applicable		Aminomalonic acid	-1	1	-1	Not applicable	Not applicable	CAR(12:0)	1	1	1	Not applicable	Not applicable
Choline	0	2	0	Not applicable	Not applicable	CAR(4:0)	-3	3	-1	Not applicable	Not applicable		1,1'-[1,12-Dodecanediylbis(oxy)]bisbenzene	1	1	1	Not applicable	Not applicable	CAR(10:0)	-1	1	-1	Not applicable	Not applicable		Ascorbic acid	-1	1	-1	Not applicable	Not applicable	CAR(16:0)	-1	1	-1	Not applicable	Not applicable
Citrulline	-2	2	-1	Not applicable	Not applicable	CAR(5:0)	-3	3	-1	Not applicable	Not applicable		2-Deoxyguanosine	-1	1	-1	Not applicable	Not applicable	CAR(10:1)	1	1	1	Not applicable	Not applicable		Aspartyl leucine	-1	1	-1	Not applicable	Not applicable	CAR(16:1)	1	1	1	Not applicable	Not applicable
D-Arabinose	-2	2	-1	Not applicable	Not applicable	LPC(22:5)	-3	3	-1	Not applicable	Not applicable		2-Piperidinone	1	1	1	Not applicable	Not applicable	Car(13:0)	1	1	1	Not applicable	Not applicable		Benzoic acid	1	1	1	Not applicable	Not applicable	CAR(18:2)	1	1	1	Not applicable	Not applicable
Guanosine	-2	2	-1	Not applicable	Not applicable	LPE(18:0)	-3	3	-1	Not applicable	Not applicable		2-Pyrrolidinone	1	1	1	Not applicable	Not applicable	CAR(16:0)	-1	1	-1	Not applicable	Not applicable		Biliverdin	1	1	1	Not applicable	Not applicable	CAR(4:0)	-1	1	-1	Not applicable	Not applicable
Hippuric acid	-2	2	-1	Not applicable	Not applicable	LPE(18:2)	-3	3	-1	Not applicable	Not applicable		2,4-Thiazolidinedione, 5-[[4-[2-[5-(1-hydroxyethyl)-2-pyridinyl]ethoxy]phenyl]methyl]-	1	1	1	Not applicable	Not applicable	CAR(18:2)	-1	1	-1	Not applicable	Not applicable		canavaninosuccinate	-1	1	-1	Not applicable	Not applicable	CAR(6:0)	-1	1	-1	Not applicable	Not applicable
Indoxyl sulfate	-2	2	-1	Not applicable	Not applicable	PC(36:4)	-3	3	-1	Not applicable	Not applicable		4-Isoxazolepropanoic acid, .alpha.-amino-2,3-dihydro-5-methyl-3-oxo-	1	1	1	Not applicable	Not applicable	CAR(3:0)	1	1	1	Not applicable	Not applicable		Choline	-1	1	-1	Not applicable	Not applicable	CE(18:3)	-1	1	-1	Not applicable	Not applicable
Inosine	0	2	0	Not applicable	Not applicable	PC(38:5)	-3	3	-1	Not applicable	Not applicable		4-Methyl-2-oxovaleric acid	-1	1	-1	Not applicable	Not applicable	CAR(4:0)	1	1	1	Not applicable	Not applicable		Cinnamic acid	1	1	1	Not applicable	Not applicable	CE(20:4)	-1	1	-1	Not applicable	Not applicable
Isobutyrate	2	2	1	Not applicable	Not applicable	SM(40:2;O2)	-3	3	-1	Not applicable	Not applicable		5'-S-Methylthioadenosine	1	1	1	Not applicable	Not applicable	CAR(5:1)	1	1	1	Not applicable	Not applicable		Citrulline	-1	1	-1	Not applicable	Not applicable	CE(22:6)	-1	1	-1	Not applicable	Not applicable
L-Kynurenine	-2	2	-1	Not applicable	Not applicable	Cer(32:0;O2)	2	2	1	Not applicable	Not applicable		5-Hydroxy-L-tryptophan	1	1	1	Not applicable	Not applicable	Chenodeoxycholic acid	-1	1	-1	Not applicable	Not applicable		Creatine	1	1	1	Not applicable	Not applicable	Cholic acid	1	1	1	Not applicable	Not applicable
L-Malic acid	0	2	0	Not applicable	Not applicable	FA(12:0)	2	2	1	Not applicable	Not applicable		5-Hydroxymethyl-2?-deoxyuridine	1	1	1	Not applicable	Not applicable	Chenodeoxyglycocholic acid	-1	1	-1	Not applicable	Not applicable		D-Arabinose	-1	1	-1	Not applicable	Not applicable	Cortisol	1	1	1	Not applicable	Not applicable
N,N-Dimethylglycine	0	2	0	Not applicable	Not applicable	FA(16:0)	2	2	1	Not applicable	Not applicable		8-Hydroxyoctanoate	1	1	1	Not applicable	Not applicable	Cholesterol	1	1	1	Not applicable	Not applicable		D-Cysteine	1	1	1	Not applicable	Not applicable	Cortol	1	1	1	Not applicable	Not applicable
Phytosphingosine	-2	2	-1	Not applicable	Not applicable	Glycoursodeoxycholic acid	2	2	1	Not applicable	Not applicable		Acetylarylamine	-1	1	-1	Not applicable	Not applicable	Dihydrocholesterol	-1	1	-1	Not applicable	Not applicable		D-Galactose	-1	1	-1	Not applicable	Not applicable	Deoxycholic acid	1	1	1	Not applicable	Not applicable
Pyruvic acid	2	2	1	Not applicable	Not applicable	PC(40:6)	2	2	1	Not applicable	Not applicable		Acetylglycine	1	1	1	Not applicable	Not applicable	FA(10:1)	1	1	1	Not applicable	Not applicable		Damascenone	-1	1	-1	Not applicable	Not applicable	FA(10:0)	1	1	1	Not applicable	Not applicable
Sarcosine	2	2	1	Not applicable	Not applicable	Sphingosine	2	2	1	Not applicable	Not applicable		Adenine	1	1	1	Not applicable	Not applicable	FA(12:1)	1	1	1	Not applicable	Not applicable		DSGEGDFXAEGGGVR	1	1	1	Not applicable	Not applicable	FA(10:1)	1	1	1	Not applicable	Not applicable
(10E)-9-Oxo-10-hexadecenoic acid	1	1	1	Not applicable	Not applicable	CAR(12:1)	0	2	0	Not applicable	Not applicable		Alpha-CEHC	1	1	1	Not applicable	Not applicable	FA(12:2)	1	1	1	Not applicable	Not applicable		Formate	-1	1	-1	Not applicable	Not applicable	FA(11:0)	1	1	1	Not applicable	Not applicable
(R)-3-Hydroxy-hexadecanoic acid	1	1	1	Not applicable	Not applicable	CAR(14:1)	0	2	0	Not applicable	Not applicable		Arachidonyl lysolecithin	1	1	1	Not applicable	Not applicable	FA(16:0)	1	1	1	Not applicable	Not applicable		Fructose	-1	1	-1	Not applicable	Not applicable	FA(11:1)	1	1	1	Not applicable	Not applicable
?-Carboxyethyl hydroxychroman	-1	1	-1	Not applicable	Not applicable	CAR(14:2)	0	2	0	Not applicable	Not applicable		Ascorbic acid	1	1	1	Not applicable	Not applicable	FA(16:1)	1	1	1	Not applicable	Not applicable		Fumaric acid	1	1	1	Not applicable	Not applicable	FA(12:0)	1	1	1	Not applicable	Not applicable
? -Glu-Citrulline	1	1	1	Not applicable	Not applicable	CAR(8:1)	0	2	0	Not applicable	Not applicable		Asparaginyl-proline	-1	1	-1	Not applicable	Not applicable	FA(18:0)	1	1	1	Not applicable	Not applicable		Galactopyranose	-1	1	-1	Not applicable	Not applicable	FA(12:1)	1	1	1	Not applicable	Not applicable
? -Glu-Gln	1	1	1	Not applicable	Not applicable	Deoxycholic acid	0	2	0	Not applicable	Not applicable		Azelaic acid	1	1	1	Not applicable	Not applicable	FA(20:0)	-1	1	-1	Not applicable	Not applicable		Galacturonic acid	-1	1	-1	Not applicable	Not applicable	FA(14:0)	1	1	1	Not applicable	Not applicable
? -Glu-Trp	1	1	1	Not applicable	Not applicable	FA(12:2)	0	2	0	Not applicable	Not applicable		Baicalin	1	1	1	Not applicable	Not applicable	FA(20:2)	1	1	1	Not applicable	Not applicable		gamma-Glutamylisoleucine	-1	1	-1	Not applicable	Not applicable	FA(14:1)	1	1	1	Not applicable	Not applicable
? -Glu-Tyr	1	1	1	Not applicable	Not applicable	Glycerol 3-phosphate	0	2	0	Not applicable	Not applicable		Benzoylcholine	1	1	1	Not applicable	Not applicable	FA(20:3)	1	1	1	Not applicable	Not applicable		Glycerol	-1	1	-1	Not applicable	Not applicable	FA(17:1)	1	1	1	Not applicable	Not applicable
1-[(5-Amino-5-carboxypentyl)amino]-1-deoxyfructose	1	1	1	Not applicable	Not applicable	PC(32:2)	0	2	0	Not applicable	Not applicable		Beta-Leucine	1	1	1	Not applicable	Not applicable	FA(20:5)	-1	1	-1	Not applicable	Not applicable		Glycylvaline	-1	1	-1	Not applicable	Not applicable	FA(18:3)	-1	1	-1	Not applicable	Not applicable
1-Methylhistidine	1	1	1	Not applicable	Not applicable	PC(34:1)	0	2	0	Not applicable	Not applicable		Betaine	-1	1	-1	Not applicable	Not applicable	FA(22:0)	-1	1	-1	Not applicable	Not applicable		Hydroxypa Imitate	1	1	1	Not applicable	Not applicable	FA(20:3)	-1	1	-1	Not applicable	Not applicable
2-deoxy-D-glucose	-1	1	-1	Not applicable	Not applicable	PC(38:7)	0	2	0	Not applicable	Not applicable		Biliverdin	1	1	1	Not applicable	Not applicable	FA(22:4)	-1	1	-1	Not applicable	Not applicable		Hydroxypurine	-1	1	-1	Not applicable	Not applicable	FA(20:5)	1	1	1	Not applicable	Not applicable
2,3-dihydroxyl-propanoic acid	-1	1	-1	Not applicable	Not applicable	PE(40:6)	0	2	0	Not applicable	Not applicable		canavaninosuccinate	1	1	1	Not applicable	Not applicable	FA(22:5)	-1	1	-1	Not applicable	Not applicable		indole-3-acetic acid	-1	1	-1	Not applicable	Not applicable	FA(22:4)	1	1	1	Not applicable	Not applicable
3-(1-pyrazolyl)-L-alanine	-1	1	-1	Not applicable	Not applicable	CAR(7:0)	-2	2	-1	Not applicable	Not applicable		Citrulline	-1	1	-1	Not applicable	Not applicable	FA(22:6)	-1	1	-1	Not applicable	Not applicable		Inosine	-1	1	-1	Not applicable	Not applicable	FA(22:5)	1	1	1	Not applicable	Not applicable
3-Amino-2-piperidone	-1	1	-1	Not applicable	Not applicable	CAR(9:0)	-2	2	-1	Not applicable	Not applicable		Creatine/beatain	1	1	1	Not applicable	Not applicable	FA(22:7)	1	1	1	Not applicable	Not applicable		Isobutyrate	1	1	1	Not applicable	Not applicable	FA(22:6)	1	1	1	Not applicable	Not applicable
3-Hydroxydodecanedioic acid	-1	1	-1	Not applicable	Not applicable	CE(20:4)	-2	2	-1	Not applicable	Not applicable		D-Arabinose	-1	1	-1	Not applicable	Not applicable	FA(23:0)	-1	1	-1	Not applicable	Not applicable		Kynurenic acid	-1	1	-1	Not applicable	Not applicable	FA(24:2)	1	1	1	Not applicable	Not applicable
3-Hydroxysebacic acid	-1	1	-1	Not applicable	Not applicable	CE(22:6)	-2	2	-1	Not applicable	Not applicable		D-Glucuronic acid	1	1	1	Not applicable	Not applicable	FA(24:1)	-1	1	-1	Not applicable	Not applicable		L-Alanine	-1	1	-1	Not applicable	Not applicable	FA(5:0)	-1	1	-1	Not applicable	Not applicable
3-Hydroxytetradecanedioic acid	-1	1	-1	Not applicable	Not applicable	Chenodeoxycholic acid	-2	2	-1	Not applicable	Not applicable		DSGEGDFXAEGGGVR	-1	1	-1	Not applicable	Not applicable	FA(24:4)	1	1	1	Not applicable	Not applicable		L-Arginine	1	1	1	Not applicable	Not applicable	FA(6:0)	1	1	1	Not applicable	Not applicable
3-Indolepropionic acid	-1	1	-1	Not applicable	Not applicable	Cholesterol	-2	2	-1	Not applicable	Not applicable		Edaravone	-1	1	-1	Not applicable	Not applicable	FA(6:0)	-1	1	-1	Not applicable	Not applicable		L-Asparagine	-1	1	-1	Not applicable	Not applicable	FA(8:0)	1	1	1	Not applicable	Not applicable
3,4-Dihydroxydihydrofuran-2(3H)-one	1	1	1	Not applicable	Not applicable	Dehydroepiandrosterone sulfate	-2	2	-1	Not applicable	Not applicable		Eicosenoic acid	-1	1	-1	Not applicable	Not applicable	FA(8:0)	1	1	1	Not applicable	Not applicable		L-Glutamine	-1	1	-1	Not applicable	Not applicable	FA(9:0)	1	1	1	Not applicable	Not applicable
4'-Hydroxyfenoprofen glucuronide	1	1	1	Not applicable	Not applicable	Glycerol-3-phosphocholine	-2	2	-1	Not applicable	Not applicable		Flumioxazin	-1	1	-1	Not applicable	Not applicable	FAAD(20:0)	-1	1	-1	Not applicable	Not applicable		L-Homoserine	-1	1	-1	Not applicable	Not applicable	Glycerol 3-phosphate	-1	1	-1	Not applicable	Not applicable
4-Hydroxynonenal	-1	1	-1	Not applicable	Not applicable	Glycerophosphocholine	-2	2	-1	Not applicable	Not applicable		Formate	-1	1	-1	Not applicable	Not applicable	FAAD(20:1)	-1	1	-1	Not applicable	Not applicable		L-Isoleucine	1	1	1	Not applicable	Not applicable	Glycerophosphocholine	-1	1	-1	Not applicable	Not applicable
4-Hydroxyretinoic acid	-1	1	-1	Not applicable	Not applicable	LPC(16:1)	-2	2	-1	Not applicable	Not applicable		gamma-Glutamylisoleucine	1	1	1	Not applicable	Not applicable	FAAD(22:2)	-1	1	-1	Not applicable	Not applicable		L-Leucine	1	1	1	Not applicable	Not applicable	LPA(16:0)	-1	1	-1	Not applicable	Not applicable
4-ketoglucose	-1	1	-1	Not applicable	Not applicable	LPC(20:2)	-2	2	-1	Not applicable	Not applicable		gamma-Glutamylphenylalanine	1	1	1	Not applicable	Not applicable	LPA(16:0)	1	1	1	Not applicable	Not applicable		L-Lysine	1	1	1	Not applicable	Not applicable	LPC(16:1)	-1	1	-1	Not applicable	Not applicable
4-Methoxycinnamic acid	-1	1	-1	Not applicable	Not applicable	LPC(P-16:0)	-2	2	-1	Not applicable	Not applicable		gamma-Glutamylthreonine	1	1	1	Not applicable	Not applicable	LPC(16:1)	-1	1	-1	Not applicable	Not applicable		L-Threonine	1	1	1	Not applicable	Not applicable	LPC(20:1)	-1	1	-1	Not applicable	Not applicable
4-Methyl-2-oxovaleric acid	-1	1	-1	Not applicable	Not applicable	LPC(P-18:0)	-2	2	-1	Not applicable	Not applicable		gamma-Glutamylvaline	1	1	1	Not applicable	Not applicable	LPC(18:3)	-1	1	-1	Not applicable	Not applicable		L-Valine	1	1	1	Not applicable	Not applicable	LPC(20:2)	-1	1	-1	Not applicable	Not applicable
5-Hydroxy-L-tryptophan	1	1	1	Not applicable	Not applicable	LPE(16:0)	-2	2	-1	Not applicable	Not applicable		Gluconic acid	1	1	1	Not applicable	Not applicable	LPC(20:2)	-1	1	-1	Not applicable	Not applicable		Leucylalanine	1	1	1	Not applicable	Not applicable	LPC(O-18:2)	-1	1	-1	Not applicable	Not applicable
5-Hydroxyhexanoic acid	1	1	1	Not applicable	Not applicable	LPE(20:2)	-2	2	-1	Not applicable	Not applicable		Glutamate, gamma-methyl ester	1	1	1	Not applicable	Not applicable	LPC(20:4)	-1	1	-1	Not applicable	Not applicable		Methionine sulfoxide	1	1	1	Not applicable	Not applicable	LPE(16:0)	-1	1	-1	Not applicable	Not applicable
5-L-Glutamyl-taurine	1	1	1	Not applicable	Not applicable	LPE(20:5)	-2	2	-1	Not applicable	Not applicable		Gly-Gly	-1	1	-1	Not applicable	Not applicable	LPC(22:6)	-1	1	-1	Not applicable	Not applicable		N-Acetyl-L-alanine	-1	1	-1	Not applicable	Not applicable	LPE(18:1)	-1	1	-1	Not applicable	Not applicable
5-Methoxyindoleacetate	-1	1	-1	Not applicable	Not applicable	PC(36:2)	-2	2	-1	Not applicable	Not applicable		Glyceric acid	1	1	1	Not applicable	Not applicable	LPC(P-16:0)	-1	1	-1	Not applicable	Not applicable		N-Acetylornithine	-1	1	-1	Not applicable	Not applicable	LPE(20:4)	-1	1	-1	Not applicable	Not applicable
5-Methyldeoxycytidine	1	1	1	Not applicable	Not applicable	PC(36:5)	-2	2	-1	Not applicable	Not applicable		Glycylvaline	1	1	1	Not applicable	Not applicable	LPE (22:6)	1	1	1	Not applicable	Not applicable		N-acetylserine	-1	1	-1	Not applicable	Not applicable	LTE4	1	1	1	Not applicable	Not applicable
6-Hydroxy-5-methoxyindole glucuronide	1	1	1	Not applicable	Not applicable	PC(36:6)	-2	2	-1	Not applicable	Not applicable		Glycyrrhizin	1	1	1	Not applicable	Not applicable	LPE(16:1)	-1	1	-1	Not applicable	Not applicable		N,N-Dimethylglycine	1	1	1	Not applicable	Not applicable	Oleamide	1	1	1	Not applicable	Not applicable
6-Hydroxymelatonin glucuronide	-1	1	-1	Not applicable	Not applicable	PC(38:4)	-2	2	-1	Not applicable	Not applicable		Guanidoacetic acid	-1	1	-1	Not applicable	Not applicable	LPE(18:2)	-1	1	-1	Not applicable	Not applicable		N6-acetyllysine	-1	1	-1	Not applicable	Not applicable	PC(28:2)	-1	1	-1	Not applicable	Not applicable
6-Methylnicotinic acid	-1	1	-1	Not applicable	Not applicable	PC(40:8)	-2	2	-1	Not applicable	Not applicable		Guanosine	1	1	1	Not applicable	Not applicable	LPE(20:4)	1	1	1	Not applicable	Not applicable		Octadecanamide	-1	1	-1	Not applicable	Not applicable	PC(32:0)	1	1	1	Not applicable	Not applicable
7-Methylguanine	1	1	1	Not applicable	Not applicable	PE(36:4)	-2	2	-1	Not applicable	Not applicable		Hirsuteine	-1	1	-1	Not applicable	Not applicable	LPE(20:5)	-1	1	-1	Not applicable	Not applicable		Oxalacetic acid	1	1	1	Not applicable	Not applicable	PC(32:1)	1	1	1	Not applicable	Not applicable
Acetate	1	1	1	Not applicable	Not applicable	PE(O-38:5)	-2	2	-1	Not applicable	Not applicable		Homoarginine	-1	1	-1	Not applicable	Not applicable	LPE(22:4)	-1	1	-1	Not applicable	Not applicable		oxoproline	1	1	1	Not applicable	Not applicable	PC(32:2)	-1	1	-1	Not applicable	Not applicable
Acetone	1	1	1	Not applicable	Not applicable	SM(36:1;O2)	-2	2	-1	Not applicable	Not applicable		Homocysteine	-1	1	-1	Not applicable	Not applicable	MGDG 15:1	1	1	1	Not applicable	Not applicable		Phenylalanyl serine	1	1	1	Not applicable	Not applicable	PC(34:1)	-1	1	-1	Not applicable	Not applicable
Acetylarylamine	-1	1	-1	Not applicable	Not applicable	SM(40:1;O2)	-2	2	-1	Not applicable	Not applicable		Hydroxycinnamic acid	-1	1	-1	Not applicable	Not applicable	Oleamide	-1	1	-1	Not applicable	Not applicable		Phenylalanyltryptophan	-1	1	-1	Not applicable	Not applicable	PC(34:2)	-1	1	-1	Not applicable	Not applicable
Acetylglycine	1	1	1	Not applicable	Not applicable	SM(42:1;O2)	-2	2	-1	Not applicable	Not applicable		Hydroxypa Imitate	1	1	1	Not applicable	Not applicable	PC(28:2)	1	1	1	Not applicable	Not applicable		Phytosphingosine	-1	1	-1	Not applicable	Not applicable	PC(34:3)	-1	1	-1	Not applicable	Not applicable
Acetylphenylalanine	1	1	1	Not applicable	Not applicable	10-undecenoate	1	1	1	Not applicable	Not applicable		Hydroxypurine	1	1	1	Not applicable	Not applicable	PC(32:0)	-1	1	-1	Not applicable	Not applicable		Pipecolinic acid	1	1	1	Not applicable	Not applicable	PC(36:5)	-1	1	-1	Not applicable	Not applicable
ADSGEGDFXAEGGGVR	1	1	1	Not applicable	Not applicable	3?,7?-Dihydroxy-5beta-cholestan-26-al	1	1	1	Not applicable	Not applicable		Inosine	1	1	1	Not applicable	Not applicable	PC(34:1)	1	1	1	Not applicable	Not applicable		Pyroglutamylglycine	-1	1	-1	Not applicable	Not applicable	PC(36:6)	-1	1	-1	Not applicable	Not applicable
Alanylalanine	-1	1	-1	Not applicable	Not applicable	3a,6a,7a,12a-Tetrahydroxy-45 b -cholan-24-oic Acid	1	1	1	Not applicable	Not applicable		L-Aspartyl-4-phosphate	1	1	1	Not applicable	Not applicable	PC(34:2)	1	1	1	Not applicable	Not applicable		Pyrrolidine	1	1	1	Not applicable	Not applicable	PC(38:3)	-1	1	-1	Not applicable	Not applicable
Alpha-CEHC	1	1	1	Not applicable	Not applicable	9-HODE	1	1	1	Not applicable	Not applicable		L-Cystine	-1	1	-1	Not applicable	Not applicable	PC(36:4)	1	1	1	Not applicable	Not applicable		Taurine	-1	1	-1	Not applicable	Not applicable	PC(38:4)	-1	1	-1	Not applicable	Not applicable
Alpha-Ketoglutaric acid	1	1	1	Not applicable	Not applicable	Aldosterone	1	1	1	Not applicable	Not applicable		L-Histidine	-1	1	-1	Not applicable	Not applicable	PC(38:5)	-1	1	-1	Not applicable	Not applicable		Trihydroxybenzene	1	1	1	Not applicable	Not applicable	PC(40:4)	-1	1	-1	Not applicable	Not applicable
Aminomalonic acid	-1	1	-1	Not applicable	Not applicable	CAR(14:0)	1	1	1	Not applicable	Not applicable		L-Homoserine	1	1	1	Not applicable	Not applicable	PC(38:6)	1	1	1	Not applicable	Not applicable		Trimethoxycinnamic_x000D_ acid	1	1	1	Not applicable	Not applicable	PC(40:6)	-1	1	-1	Not applicable	Not applicable
Ascorbic acid	1	1	1	Not applicable	Not applicable	CAR(16:2)	1	1	1	Not applicable	Not applicable		L-Kynurenine	1	1	1	Not applicable	Not applicable	PC(38:7)	1	1	1	Not applicable	Not applicable		Uric acid	-1	1	-1	Not applicable	Not applicable	PC(40:8)	1	1	1	Not applicable	Not applicable
Asparaginyl-proline	1	1	1	Not applicable	Not applicable	CAR(18:0)	1	1	1	Not applicable	Not applicable		L-Lysine	1	1	1	Not applicable	Not applicable	PC(40:6)	1	1	1	Not applicable	Not applicable		Uridine	-1	1	-1	Not applicable	Not applicable	PC(O-34:1)	-1	1	-1	Not applicable	Not applicable
Aspartyl leucine	-1	1	-1	Not applicable	Not applicable	Cer(38:0;O2)	1	1	1	Not applicable	Not applicable		L-Theanine	-1	1	-1	Not applicable	Not applicable	PC(40:7)	1	1	1	Not applicable	Not applicable		Vanillic acid	-1	1	-1	Not applicable	Not applicable	PE(O-36:5)	-1	1	-1	Not applicable	Not applicable
Aspartyl phenylalanine	-1	1	-1	Not applicable	Not applicable	Cer(40:0;O2)	1	1	1	Not applicable	Not applicable		L-Tryptophan	-1	1	-1	Not applicable	Not applicable	PC(40:9)	1	1	1	Not applicable	Not applicable		Xanthine	-1	1	-1	Not applicable	Not applicable	PE(O-40:7)	-1	1	-1	Not applicable	Not applicable
Azaleatin 3-arabinoside	1	1	1	Not applicable	Not applicable	Chenodeoxyglycocholic acid	1	1	1	Not applicable	Not applicable		Leucylalanine	-1	1	-1	Not applicable	Not applicable	PC(42:1)	-1	1	-1	Not applicable	Not applicable						Not applicable	Not applicable	PGEM	1	1	1	Not applicable	Not applicable
Benzoic acid	-1	1	-1	Not applicable	Not applicable	Cortisol	1	1	1	Not applicable	Not applicable		Lovastatin hydroxy acid	1	1	1	Not applicable	Not applicable	PC(8:0)	-1	1	-1	Not applicable	Not applicable								PGF2A	1	1	1	Not applicable	Not applicable
Benzoylcarnitine	1	1	1	Not applicable	Not applicable	Cotinine/serotonin	1	1	1	Not applicable	Not applicable		Malic acid	1	1	1	Not applicable	Not applicable	PE(38:4)	1	1	1	Not applicable	Not applicable								SM(36:1;O2)	-1	1	-1	Not applicable	Not applicable
beta-D-Glucose	-1	1	-1	Not applicable	Not applicable	FA(10:0)	1	1	1	Not applicable	Not applicable		Malonic acid	1	1	1	Not applicable	Not applicable	PE(O-36:5)	-1	1	-1	Not applicable	Not applicable								SM(36:2;O2)	-1	1	-1	Not applicable	Not applicable
Betaine	1	1	1	Not applicable	Not applicable	FA(10:1)	1	1	1	Not applicable	Not applicable		Myo-inositol	1	1	1	Not applicable	Not applicable	PE(O-40:7)	-1	1	-1	Not applicable	Not applicable								SM(38:1;O2)	-1	1	-1	Not applicable	Not applicable
Bilirubin isomer 1	1	1	1	Not applicable	Not applicable	FA(11:0)	1	1	1	Not applicable	Not applicable		N-Acetyl-?-alanine	-1	1	-1	Not applicable	Not applicable	SM(40:2;O2)	-1	1	-1	Not applicable	Not applicable								SM(40:1;O2)	-1	1	-1	Not applicable	Not applicable
Bilirubin isomer 2	1	1	1	Not applicable	Not applicable	FA(11:1)	1	1	1	Not applicable	Not applicable		N-Acetyl-L-alanine	1	1	1	Not applicable	Not applicable	Sphingosine	1	1	1	Not applicable	Not applicable								SM(40:2;O2)	-1	1	-1	Not applicable	Not applicable
Caffeine	1	1	1	Not applicable	Not applicable	FA(12:1)	1	1	1	Not applicable	Not applicable		N-acetylserine	1	1	1	Not applicable	Not applicable	Sphingosine-1-phosphate	1	1	1	Not applicable	Not applicable								SM(41:1;O2)	-1	1	-1	Not applicable	Not applicable
canavaninosuccinate	1	1	1	Not applicable	Not applicable	FA(14:1)	1	1	1	Not applicable	Not applicable		N-Arachidonoyl-3-hydroxy-.gamma.-aminobutyric acid	1	1	1	Not applicable	Not applicable	Tauro-b-muricholic acid	1	1	1	Not applicable	Not applicable								SM(41:2;O2)	-1	1	-1	Not applicable	Not applicable
Cinnamic acid	-1	1	-1	Not applicable	Not applicable	FA(17:1)	1	1	1	Not applicable	Not applicable		N-Carbamoyl ?-alanine	-1	1	-1	Not applicable	Not applicable	Taurodeoxycholic acid	1	1	1	Not applicable	Not applicable								SM(42:1;O2)	-1	1	-1	Not applicable	Not applicable
Coreximine	1	1	1	Not applicable	Not applicable	FA(19:0)	1	1	1	Not applicable	Not applicable		N-Nitroso-pyrrolidine	1	1	1	Not applicable	Not applicable	Thromboxane B2	1	1	1	Not applicable	Not applicable								Sphingosine	-1	1	-1	Not applicable	Not applicable
Cystathionine	1	1	1	Not applicable	Not applicable	FA(20:2)	1	1	1	Not applicable	Not applicable		N,N-Dimethylglycine	-1	1	-1	Not applicable	Not applicable														Taurochenodesoxycholic acid	1	1	1	Not applicable	Not applicable
Cytidine	-1	1	-1	Not applicable	Not applicable	FA(20:3)	1	1	1	Not applicable	Not applicable		N2,N2-Dimethylguanosine	-1	1	-1	Not applicable	Not applicable														Taurocholenate sulfate	1	1	1	Not applicable	Not applicable
D-Aspartic acid	-1	1	-1	Not applicable	Not applicable	FA(24:2)	1	1	1	Not applicable	Not applicable		N6-acetyllysine	1	1	1	Not applicable	Not applicable														Taurocholic acid	1	1	1	Not applicable	Not applicable
D-Cysteine	1	1	1	Not applicable	Not applicable	FA(6:0)	1	1	1	Not applicable	Not applicable		N6,N6,N6-Trimethyl-L-lysine	-1	1	-1	Not applicable	Not applicable														Taurolithocholate 3-sulfate	1	1	1	Not applicable	Not applicable
D-Glucuronic acid	1	1	1	Not applicable	Not applicable	FA(8:0)	1	1	1	Not applicable	Not applicable		Oxalacetic acid	1	1	1	Not applicable	Not applicable														Tauroursodeoxycholic acid	1	1	1	Not applicable	Not applicable
D-Mannose	-1	1	-1	Not applicable	Not applicable	FA(9:0)	1	1	1	Not applicable	Not applicable		Oxalic acid	1	1	1	Not applicable	Not applicable														TG(50:4)	-1	1	-1	Not applicable	Not applicable
Damascenone	1	1	1	Not applicable	Not applicable	galCer(36:5)	1	1	1	Not applicable	Not applicable		p-Toluenesulfonic acid	1	1	1	Not applicable	Not applicable														TG(51:3)	-1	1	-1	Not applicable	Not applicable
dimethyl sulfone	-1	1	-1	Not applicable	Not applicable	Glycoursodeoxycholate sulfate	1	1	1	Not applicable	Not applicable		Paracetamol	-1	1	-1	Not applicable	Not applicable														TG(51:4)	-1	1	-1	Not applicable	Not applicable
Diphenol glucuronide	1	1	1	Not applicable	Not applicable	Inositol-P-ceramide	1	1	1	Not applicable	Not applicable		Phenylalanyl phenylalanine	-1	1	-1	Not applicable	Not applicable														TG(52:1)	-1	1	-1	Not applicable	Not applicable
DSGEGDFXAEGGGVR	1	1	1	Not applicable	Not applicable	LacCer(40:3)	1	1	1	Not applicable	Not applicable		Phenylethylamine	1	1	1	Not applicable	Not applicable														TG(52:3)	-1	1	-1	Not applicable	Not applicable
Estragonoside	1	1	1	Not applicable	Not applicable	Leukotriene B4	1	1	1	Not applicable	Not applicable		Phytosphingosine	-1	1	-1	Not applicable	Not applicable														TG(52:4)	-1	1	-1	Not applicable	Not applicable
Ethanol	1	1	1	Not applicable	Not applicable	LPI(16:0)	1	1	1	Not applicable	Not applicable		Pipecolinic acid	-1	1	-1	Not applicable	Not applicable														TG(52:5)	-1	1	-1	Not applicable	Not applicable
Ethanolamine	-1	1	-1	Not applicable	Not applicable	Palmitic amide	1	1	1	Not applicable	Not applicable		Piperidine	-1	1	-1	Not applicable	Not applicable														TG(52:6)	-1	1	-1	Not applicable	Not applicable
Formate	-1	1	-1	Not applicable	Not applicable	PC(28:2)	1	1	1	Not applicable	Not applicable		Propyphenazon	-1	1	-1	Not applicable	Not applicable														TG(53:2)	-1	1	-1	Not applicable	Not applicable
Fructose	-1	1	-1	Not applicable	Not applicable	PC(31:0)	1	1	1	Not applicable	Not applicable		pyroglutamic acid/glutamic acid	-1	1	-1	Not applicable	Not applicable														TG(53:3)	-1	1	-1	Not applicable	Not applicable
Galactopyranose	-1	1	-1	Not applicable	Not applicable	PC(40:7)	1	1	1	Not applicable	Not applicable		Pyroglutamylglycine	1	1	1	Not applicable	Not applicable														TG(53:4)	-1	1	-1	Not applicable	Not applicable
Galacturonic acid	-1	1	-1	Not applicable	Not applicable	PC(40:9)	1	1	1	Not applicable	Not applicable		SM(24:1)	1	1	1	Not applicable	Not applicable														TG(54:4)	-1	1	-1	Not applicable	Not applicable
gamma-Aminobutyric acid	1	1	1	Not applicable	Not applicable	PC(O-34:1)	1	1	1	Not applicable	Not applicable		sorbose	-1	1	-1	Not applicable	Not applicable														TG(54:7)	-1	1	-1	Not applicable	Not applicable
gamma-Glutamylphenylalanine	1	1	1	Not applicable	Not applicable	PC(O-40:7)	1	1	1	Not applicable	Not applicable		Succinic acid	1	1	1	Not applicable	Not applicable														TG(56:5)	-1	1	-1	Not applicable	Not applicable
Gluconic acid	1	1	1	Not applicable	Not applicable	PE(34:1)	1	1	1	Not applicable	Not applicable		Succinyladenosine	1	1	1	Not applicable	Not applicable														TG(56:6)	-1	1	-1	Not applicable	Not applicable
Glucosamine	-1	1	-1	Not applicable	Not applicable	PE(40:5)	1	1	1	Not applicable	Not applicable		Tagatose	-1	1	-1	Not applicable	Not applicable														TG(56:9)	-1	1	-1	Not applicable	Not applicable
Glyceric acid	1	1	1	Not applicable	Not applicable	PG(O-31:2)	1	1	1	Not applicable	Not applicable		Taurine	1	1	1	Not applicable	Not applicable														Thromboxane B2	1	1	1	Not applicable	Not applicable
Glycylvaline	-1	1	-1	Not applicable	Not applicable	PI(36:4)	1	1	1	Not applicable	Not applicable		Trans-4-Hydroxyproline	-1	1	-1	Not applicable	Not applicable
Guanidinosuccinic acid	1	1	1	Not applicable	Not applicable	Prostaglandin E3	1	1	1	Not applicable	Not applicable		Trans-Cinnamic acid	1	1	1	Not applicable	Not applicable
Guanine	1	1	1	Not applicable	Not applicable	SM(42:3;O2)	1	1	1	Not applicable	Not applicable		Trihydroxybenzene	-1	1	-1	Not applicable	Not applicable
Guanosine hexaphosphate adenosine	1	1	1	Not applicable	Not applicable	Taurochenodeoxycholic acid	1	1	1	Not applicable	Not applicable		Trimethylamine N-oxide	-1	1	-1	Not applicable	Not applicable
Homoarginine	-1	1	-1	Not applicable	Not applicable	Taurocholenate sulfate	1	1	1	Not applicable	Not applicable		Urea	-1	1	-1	Not applicable	Not applicable
Hydroxycinnamic acid	-1	1	-1	Not applicable	Not applicable	Taurodeoxycholic acid	1	1	1	Not applicable	Not applicable		Vanillic acid	1	1	1	Not applicable	Not applicable
Hydroxypurine	1	1	1	Not applicable	Not applicable	Taurolithocholate 3-sulfate	1	1	1	Not applicable	Not applicable
Hypaphorine	-1	1	-1	Not applicable	Not applicable	TCDCA/GCDCA ratio	1	1	1	Not applicable	Not applicable
indole-3-acetic acid	-1	1	-1	Not applicable	Not applicable	TDCA/GDCA ratio	1	1	1	Not applicable	Not applicable
Indole-3-carbinol	-1	1	-1	Not applicable	Not applicable	TG(50:2)	1	1	1	Not applicable	Not applicable
Indolelactic acid	-1	1	-1	Not applicable	Not applicable	Ursodeoxycholic acid	1	1	1	Not applicable	Not applicable
Isatin	1	1	1	Not applicable	Not applicable	1-Linoleoyl glycerophosphochline	-1	1	-1	Not applicable	Not applicable
Iso-Valeraldehyde	-1	1	-1	Not applicable	Not applicable	11b-Hydroxyprogesterone	-1	1	-1	Not applicable	Not applicable
Isoleucyl-Phenylalanine	-1	1	-1	Not applicable	Not applicable	12-HEPE	-1	1	-1	Not applicable	Not applicable
Kynurenic acid	-1	1	-1	Not applicable	Not applicable	13-HODE	-1	1	-1	Not applicable	Not applicable
L-Aspartyl-4-phosphate	-1	1	-1	Not applicable	Not applicable	4-HDoHE	-1	1	-1	Not applicable	Not applicable
L-aspartyl-L-phenylalanine	-1	1	-1	Not applicable	Not applicable	5-HETE	-1	1	-1	Not applicable	Not applicable
L-Cystine	1	1	1	Not applicable	Not applicable	6-trans-Leukotriene B4	-1	1	-1	Not applicable	Not applicable
L-Glutamyl-L-Glutamate	1	1	1	Not applicable	Not applicable	7a-Hydroxy-cholestene-3-one	-1	1	-1	Not applicable	Not applicable
L-Glycyl-L-glutamine	-1	1	-1	Not applicable	Not applicable	Alpha-Tocopherol	-1	1	-1	Not applicable	Not applicable
L-Glycyl-L-Phenylalanine	-1	1	-1	Not applicable	Not applicable	BCAA ( Leu +Ile +Val)/ArAA (Phe+Tyr)	-1	1	-1	Not applicable	Not applicable
L-Histidinyl-Cysteine	-1	1	-1	Not applicable	Not applicable	C16 Sphinganine	-1	1	-1	Not applicable	Not applicable
L-Theanine	-1	1	-1	Not applicable	Not applicable	CAR(6:0)	-1	1	-1	Not applicable	Not applicable
L-Tryptophyl-L-phenylalanine	-1	1	-1	Not applicable	Not applicable	CE(16:0)	-1	1	-1	Not applicable	Not applicable
L,L-Cyclo(leucylprolyl)	1	1	1	Not applicable	Not applicable	CE(18:1)	-1	1	-1	Not applicable	Not applicable
Malic acid	1	1	1	Not applicable	Not applicable	CE(18:2)	-1	1	-1	Not applicable	Not applicable
Malonic acid	1	1	1	Not applicable	Not applicable	CE(18:3)	-1	1	-1	Not applicable	Not applicable
Mesterolone	-1	1	-1	Not applicable	Not applicable	Dehydroepiandrosterone	-1	1	-1	Not applicable	Not applicable
Methionine sulfoxide	1	1	1	Not applicable	Not applicable	Deoxycholic acid 3-glucuronide	-1	1	-1	Not applicable	Not applicable
Methyl lucopyranoside	-1	1	-1	Not applicable	Not applicable	DG(34:0)	-1	1	-1	Not applicable	Not applicable
Myristamide	1	1	1	Not applicable	Not applicable	DG(36:0)	-1	1	-1	Not applicable	Not applicable
N-Acetyl-?-alanine	-1	1	-1	Not applicable	Not applicable	DG(36:3)	-1	1	-1	Not applicable	Not applicable
N-Acetyl-L-tyrosine	-1	1	-1	Not applicable	Not applicable	DG(36:4)	-1	1	-1	Not applicable	Not applicable
N-Acetyl-neuraminic_x000D_ acid	-1	1	-1	Not applicable	Not applicable	DG(38:0)	-1	1	-1	Not applicable	Not applicable
N-Acetylornithine	-1	1	-1	Not applicable	Not applicable	DG(40:5)	-1	1	-1	Not applicable	Not applicable
N-acetyltryptophan	-1	1	-1	Not applicable	Not applicable	DG(44:2)	-1	1	-1	Not applicable	Not applicable
N1-Acetylspermidine	1	1	1	Not applicable	Not applicable	FA(14:0)	-1	1	-1	Not applicable	Not applicable
N8-Acetylspermidine	1	1	1	Not applicable	Not applicable	FA(22:7)	-1	1	-1	Not applicable	Not applicable
Oxalacetic acid	1	1	1	Not applicable	Not applicable	FA(24:0)	-1	1	-1	Not applicable	Not applicable
p-Hydroxyphenyllactic acid	1	1	1	Not applicable	Not applicable	FA(5:0)	-1	1	-1	Not applicable	Not applicable
Phe Ile	-1	1	-1	Not applicable	Not applicable	FAAD(20:1)	-1	1	-1	Not applicable	Not applicable
Phenylalanyl serine	-1	1	-1	Not applicable	Not applicable	GalCer(36:3)	-1	1	-1	Not applicable	Not applicable
Phenylalanyltryptophan	-1	1	-1	Not applicable	Not applicable	Lithocholic acid	-1	1	-1	Not applicable	Not applicable
Phenylethylamine	1	1	1	Not applicable	Not applicable	LPA(16:0)	-1	1	-1	Not applicable	Not applicable
Phosphoric acid	-1	1	-1	Not applicable	Not applicable	LPA(18:1)	-1	1	-1	Not applicable	Not applicable
Pipecolinic acid	-1	1	-1	Not applicable	Not applicable	LPA(O-16:1)	-1	1	-1	Not applicable	Not applicable
Propylparaben	-1	1	-1	Not applicable	Not applicable	LPC 20:2	-1	1	-1	Not applicable	Not applicable
Purine	-1	1	-1	Not applicable	Not applicable	LPC 22:5	-1	1	-1	Not applicable	Not applicable
Pyroglutamylglycine	-1	1	-1	Not applicable	Not applicable	LPC(12:0)	-1	1	-1	Not applicable	Not applicable
Pyrrolidine	1	1	1	Not applicable	Not applicable	LPC(17:1)	-1	1	-1	Not applicable	Not applicable
Retinol	-1	1	-1	Not applicable	Not applicable	LPC(18:4)	-1	1	-1	Not applicable	Not applicable
S-Prenyl-Cysteine	-1	1	-1	Not applicable	Not applicable	LPC(20:1)	-1	1	-1	Not applicable	Not applicable
Serotonin	-1	1	-1	Not applicable	Not applicable	LPC(22:0)	-1	1	-1	Not applicable	Not applicable
Sorbitol	-1	1	-1	Not applicable	Not applicable	LPC(24:0)	-1	1	-1	Not applicable	Not applicable
Succinyladenosine	1	1	1	Not applicable	Not applicable	LPC(O-16:0)	-1	1	-1	Not applicable	Not applicable
Threoninyl-Gamma-glutamate	1	1	1	Not applicable	Not applicable	LPC(O-18:0)	-1	1	-1	Not applicable	Not applicable
Thyroxine	-1	1	-1	Not applicable	Not applicable	LPC(O-18:1)	-1	1	-1	Not applicable	Not applicable
Trans-4-Hydroxyproline	-1	1	-1	Not applicable	Not applicable	LPC(O-18:2)	-1	1	-1	Not applicable	Not applicable
Trans-Cinnamic acid	1	1	1	Not applicable	Not applicable	LPE(16:1)	-1	1	-1	Not applicable	Not applicable
Trihydroxybenzene	-1	1	-1	Not applicable	Not applicable	LPE(18:1)	-1	1	-1	Not applicable	Not applicable
Trimethoxycinnamic acid	-1	1	-1	Not applicable	Not applicable	LPE(20:1)	-1	1	-1	Not applicable	Not applicable
Trimethylamine N-oxide	-1	1	-1	Not applicable	Not applicable	LPE(22:4)	-1	1	-1	Not applicable	Not applicable
Urea	-1	1	-1	Not applicable	Not applicable	LPE(P-16:0)	-1	1	-1	Not applicable	Not applicable
Vanillic acid	-1	1	-1	Not applicable	Not applicable	MG(16:0)	-1	1	-1	Not applicable	Not applicable
Xanthine	1	1	1	Not applicable	Not applicable	Octadecanamide	-1	1	-1	Not applicable	Not applicable
Xanthosine	-1	1	-1	Not applicable	Not applicable	PC(15:0)	-1	1	-1	Not applicable	Not applicable
						PC(16:0)	-1	1	-1	Not applicable	Not applicable
						PC(18:1)	-1	1	-1	Not applicable	Not applicable
						PC(32:4)	-1	1	-1	Not applicable	Not applicable
						PC(33:0)	-1	1	-1	Not applicable	Not applicable
						PC(34:2)	-1	1	-1	Not applicable	Not applicable
						PC(34:3)	-1	1	-1	Not applicable	Not applicable
						PC(34:4)	-1	1	-1	Not applicable	Not applicable
						PC(35:4)	-1	1	-1	Not applicable	Not applicable
						PC(38:3)	-1	1	-1	Not applicable	Not applicable
						PC(39:2)	-1	1	-1	Not applicable	Not applicable
						PC(40:4)	-1	1	-1	Not applicable	Not applicable
						PC(40:5)	-1	1	-1	Not applicable	Not applicable
						PC(40:7)	-1	1	-1	Not applicable	Not applicable
						PC(40:9)	-1	1	-1	Not applicable	Not applicable
						PC(8:0)	-1	1	-1	Not applicable	Not applicable
						PC(O-18:0)	-1	1	-1	Not applicable	Not applicable
						PC(O-30:2)	-1	1	-1	Not applicable	Not applicable
						PE(40:4)	-1	1	-1	Not applicable	Not applicable
						PE(O-16:1)	-1	1	-1	Not applicable	Not applicable
						PE(O-18:1)	-1	1	-1	Not applicable	Not applicable
						PE(O-36:4)	-1	1	-1	Not applicable	Not applicable
						PE(O-36:5)	-1	1	-1	Not applicable	Not applicable
						PE(O-38:3)	-1	1	-1	Not applicable	Not applicable
						PE(O-38:4)	-1	1	-1	Not applicable	Not applicable
						PE(O-38:7)	-1	1	-1	Not applicable	Not applicable
						PE(O-40:7)	-1	1	-1	Not applicable	Not applicable
						PE(O-40:8)	-1	1	-1	Not applicable	Not applicable
						SM(18:1;O2)	-1	1	-1	Not applicable	Not applicable
						SM(18:2)	-1	1	-1	Not applicable	Not applicable
						SM(36:2)	-1	1	-1	Not applicable	Not applicable
						SM(36:2;O2)	-1	1	-1	Not applicable	Not applicable
						SM(38:1;O2)	-1	1	-1	Not applicable	Not applicable
						SM(38:2;O2)	-1	1	-1	Not applicable	Not applicable
						SM(39:1)	-1	1	-1	Not applicable	Not applicable
						SM(41:1;O2)	-1	1	-1	Not applicable	Not applicable
						SM(41:2;O2)	-1	1	-1	Not applicable	Not applicable
						Sphingosine-1-phosphate	-1	1	-1	Not applicable	Not applicable
						TG(44:1)	-1	1	-1	Not applicable	Not applicable
						TG(46:0)	-1	1	-1	Not applicable	Not applicable
						TG(46:1)	-1	1	-1	Not applicable	Not applicable
						TG(46:2)	-1	1	-1	Not applicable	Not applicable
						TG(46:3)	-1	1	-1	Not applicable	Not applicable
						TG(47:0)	-1	1	-1	Not applicable	Not applicable
						TG(48:0)	-1	1	-1	Not applicable	Not applicable
						TG(48:1)	-1	1	-1	Not applicable	Not applicable
						TG(48:2)	-1	1	-1	Not applicable	Not applicable
						TG(48:3)	-1	1	-1	Not applicable	Not applicable
						TG(49:0)	-1	1	-1	Not applicable	Not applicable
						TG(49:1)	-1	1	-1	Not applicable	Not applicable
						TG(50:0)	-1	1	-1	Not applicable	Not applicable
						TG(50:4)	-1	1	-1	Not applicable	Not applicable
						TG(51:1)	-1	1	-1	Not applicable	Not applicable
						TG(51:3)	-1	1	-1	Not applicable	Not applicable
						TG(51:4)	-1	1	-1	Not applicable	Not applicable
						TG(52:0)	-1	1	-1	Not applicable	Not applicable
						TG(52:1)	-1	1	-1	Not applicable	Not applicable
						TG(52:4)	-1	1	-1	Not applicable	Not applicable
						TG(52:5)	-1	1	-1	Not applicable	Not applicable
						TG(52:6)	-1	1	-1	Not applicable	Not applicable
						TG(53:1)	-1	1	-1	Not applicable	Not applicable
						TG(53:2)	-1	1	-1	Not applicable	Not applicable
						TG(53:3)	-1	1	-1	Not applicable	Not applicable
						TG(53:4)	-1	1	-1	Not applicable	Not applicable
						TG(54:7)	-1	1	-1	Not applicable	Not applicable
						TG(56:5)	-1	1	-1	Not applicable	Not applicable
						TG(56:6)	-1	1	-1	Not applicable	Not applicable
						TG(56:9)	-1	1	-1	Not applicable	Not applicable
						TG(60:10)	-1	1	-1	Not applicable	Not applicable
						TG(60:2)	-1	1	-1	Not applicable	Not applicable
						Undecanoyl-L-carnitine	-1	1	-1	Not applicable	Not applicable

## Sheet: Table S4
Table S4A. Metabolite enrichment pathway analysis result						Table S4B. Lipid sub-class enrichment analysis result
Pathway name	Total	Expected	Hits	FDR		Pathway name	total	expected	hits	FDR	Lipid class
HCC vs. Control						HCC vs. Control
Aminoacyl-tRNA biosynthesis	48	1.7032	17	2.62e-12		Glycerophosphocholines	4700	1.54	27	1.8e-24	LPC, PC
Arginine biosynthesis	14	0.49677	7	5.26e-06		Fatty esters	1870	0.613	11	3.5e-09	FA
Alanine, aspartate and glutamate metabolism	28	0.99355	9	5.26e-06		Sterol esters	86	0.0282	2	0.0271	CE
Primary bile acid biosynthesis	46	1.6323	8	0.0028834		Fatty Acids and Conjugates	3090	1.01	6	0.0271	FA
Arginine and proline metabolism	38	1.3484	6	0.029189		Glycerophosphoethanolamines	4350	1.43	7	0.0271	LPE, PE
Valine, leucine and isoleucine biosynthesis	8	0.28387	3	0.029234		Organic phosphoric acids	11	0.0036	1	0.146	NA
Phenylalanine metabolism	10	0.35484	3	0.042311		HCC vs. LC
Citrate cycle (TCA cycle)	20	0.70968	4	0.042311		Glycerophosphocholines	4700	0.45	8	1.44e-06	LPC, PC
Glyoxylate and dicarboxylate metabolism	32	1.1355	5	0.042311		Fatty Acids and Conjugates	3090	0.296	4	0.0229	FA
Glycine, serine and threonine metabolism	33	1.171	5	0.043681		LC vs. Control
Phenylalanine, tyrosine and tryptophan biosynthesis	4	0.14194	2	0.054123		Glycerophosphocholines	4700	0.545	12	8.01e-12	LPC, PC
Butanoate metabolism	15	0.53226	3	0.095544		Fatty Acids and Conjugates	3090	0.358	6	0.000138	FA
Nitrogen metabolism	6	0.2129	2	0.095544		Eicosanoids	992	0.115	3	0.0166	FA
D-Glutamine and D-glutamate metabolism	6	0.2129	2	0.095544
Histidine metabolism	16	0.56774	3	0.095544
Porphyrin and chlorophyll metabolism	30	1.0645	4	0.10279
Taurine and hypotaurine metabolism	8	0.28387	2	0.14085
Ascorbate and aldarate metabolism	8	0.28387	2	0.14085
Pyruvate metabolism	22	0.78065	3	0.17853
HCC vs. LC
Aminoacyl-tRNA biosynthesis	48	1.0219	12	3.4045e-09
Arginine biosynthesis	14	0.29806	5	0.00023491
Glyoxylate and dicarboxylate metabolism	32	0.68129	6	0.0009937
Alanine, aspartate and glutamate metabolism	28	0.59613	5	0.004658
Valine, leucine and isoleucine biosynthesis	8	0.17032	3	0.0077017
Primary bile acid biosynthesis	46	0.97935	5	0.030828
Phenylalanine, tyrosine and tryptophan biosynthesis	4	0.085161	2	0.030828
Nitrogen metabolism	6	0.12774	2	0.058358
D-Glutamine and D-glutamate metabolism	6	0.12774	2	0.058358
Arginine and proline metabolism	38	0.80903	4	0.06341
Phenylalanine metabolism	10	0.2129	2	0.1358
Glutathione metabolism	28	0.59613	3	0.14035
LC vs. Control
Aminoacyl-tRNA biosynthesis	48	0.52645	7	2.2592e-05
Alanine, aspartate and glutamate metabolism	28	0.3071	4	0.0072621
Arginine biosynthesis	14	0.15355	3	0.010381
Phenylalanine, tyrosine and tryptophan biosynthesis	4	0.043871	2	0.014091
Primary bile acid biosynthesis	46	0.50452	4	0.020483
Glutathione metabolism	28	0.3071	3	0.042461
Porphyrin and chlorophyll metabolism	30	0.32903	3	0.044494
Glyoxylate and dicarboxylate metabolism	32	0.35097	3	0.04518
Phenylalanine metabolism	10	0.10968	2	0.04518
Arginine and proline metabolism	38	0.41677	3	0.06128
Butanoate metabolism	15	0.16452	2	0.083511
Histidine metabolism	16	0.17548	2	0.086926
Citrate cycle (TCA cycle)	20	0.21935	2	0.12381

## Sheet: Table S5
Table S5A. Differential gene expression from the PBMC transcriptomics meta-analysis of hepatocellular carcinoma versus control									Table S5B. Differential gene expression from the PBMC transcriptomics of hepatocellular carcinoma versus liver cirrhosis
EntrezID	Name	GSE58208_u133plus2_FC	GSE49515_u133plus2_FC	GSE58208_u133plus2_Pval	GSE49515_u133plus2_Pval	CombinedES	Pval		EntrezID	Name	adj.P.Val	logFC
27030	MLH3	1.4518	1.3795	0.0047029	3.67e-05	2.8588	0.00020905		26061	HACL1	0.0105	-0.273742
112597	CYTOR	0.5977	0.60346	0.0063616	0.00022578	2.494	0.0003794		22803	XRN2	0.0105	-0.284776
85236	H2BC12	1.0141	0.70933	0.0015539	0.00069324	2.5736	0.0003794		3360	HTR4	0.00418	0.252536
27018	BEX3	1.0445	0.90571	0.0040967	0.00037884	2.5058	0.0003794		5805	PTS	0.0496	-0.317282
140461	ASB8	0.27639	0.32437	0.011857	7.87e-05	2.5207	0.0003794		8165	AKAP1	1.23e-06	0.925268
3659	IRF1	0.75961	0.6429	0.012404	0.00019268	2.3857	0.00047316		57143	ADCK1	0.0341	-0.177685
3081	HGD	0.78223	0.62932	0.0043747	0.00074393	2.3806	0.00047316		83451	ABHD11	8.32e-07	0.985451
8357	H3C10	1.504	1.7544	0.018832	7.67e-05	2.3806	0.00047316		25864	ABHD14A	0.0019	-0.304531
29066	ZC3H7A	-0.40932	-0.38222	0.0061993	0.0004439	-2.3984	0.00047316		171586	ABHD3	0.00222	-0.528787
23761	PISD	0.62253	0.53713	0.017556	0.00016933	2.3381	0.00052365		55057	AIM1L	1.21e-05	0.593254
8334	H2AC6	1.2766	1.2751	0.0080225	0.00052043	2.3249	0.00052365		43	ACHE	0.00398	0.416214
84281	C2orf88	1.4078	1.2431	0.0041394	0.0010999	2.3239	0.00052365		55860	ACTR10	0.0215	-0.299317
100128731	OST4	0.59571	0.613	0.02378	0.00011108	2.3295	0.00056943		29	ABR	0.00165	0.310239
10487	CAP1	0.26878	0.25924	0.017039	0.00026394	2.2867	0.00061609		2180	ACSL1	0.0496	-0.351749
58497	PRUNE1	0.64935	0.75091	0.015389	0.00034804	2.2699	0.00062771		4185	ADAM11	2.62e-07	0.810972
10857	PGRMC1	0.98339	0.75039	0.0061287	0.0015882	2.2017	0.00064277		140	ADORA3	0.000117	0.571435
54838	WBP1L	0.33021	0.39718	0.017111	4.59e-05	2.5226	0.00064277		132	ADK	0.0214	-0.233998
22885	ABLIM3	1.2167	0.7598	0.0029029	0.0027886	2.2147	0.00064277		79602	ADIPOR2	0.0163	-0.200513
7504	XK	1.7191	1.712	0.012791	0.00060378	2.2233	0.00064277		8883	APPBP1	0.0129	-0.348918
8970	H2BC11	1.1775	0.80495	0.0025376	0.0026224	2.2481	0.00064277		29945	ANAPC4	0.000702	-0.523881
58190	CTDSP1	0.36717	0.27622	0.015052	0.00050577	2.2208	0.00064277		23294	ANKS1A	0.0395	0.15868
80212	CCDC92	0.74533	0.47782	0.006192	0.0015848	2.1992	0.00064277		301	ANXA1	0.000415	-0.509083
50515	CHST11	0.36989	0.31214	0.013385	0.00062611	2.21	0.00064277		311	ANXA11	0.00595	0.409478
63933	MCUR1	0.79619	0.68691	0.011388	0.00088108	2.1859	0.00067587		308	ANXA5	0.0231	-0.367999
200081	TXLNA	0.35857	0.36319	0.031863	0.00013992	2.236	0.00068997		84168	ANTXR1	0.00394	0.315961
2274	FHL2	0.89372	1.0116	0.017655	0.0005557	2.1781	0.00068997		51582	AZIN1	0.00671	-0.37099
5196	PF4	1.1859	1.2038	0.0052455	0.0023176	2.1617	0.00073702		51074	APIP	0.000194	-0.405409
124790	HEXIM2	0.61491	0.67974	0.027332	0.00035093	2.1582	0.00080767		337	APOA4	5.88e-06	0.831642
11334	TUSC2	0.23041	0.1985	0.013732	0.0010311	2.1335	0.00082405		362	AQP5	1.21e-06	0.679429
23052	ENDOD1	0.76682	0.5589	0.0039072	0.0034786	2.1387	0.00082949		241	ALOX5AP	0.000649	0.374517
115509	ZNF689	0.25137	0.25986	0.0094446	0.0017994	2.1091	0.00091442		57140	RNPEPL1	0.000309	0.490374
1950	EGF	1.378	1.1997	0.0087782	0.0020642	2.1009	0.00094458		79637	ARMC7	3.04e-05	0.45288
22820	COPG1	0.54711	0.45053	0.011857	0.0016954	2.0843	0.0010327		406	ARNTL	0.00876	-0.350549
9402	GRAP2	0.87598	0.78674	0.01519	0.0013472	2.0801	0.0010422		175	AGA	0.0184	-0.254014
760	CA2	1.1391	1.6117	0.02715	8.83e-05	2.327	0.0011029		5926	ARID4A	0.0384	0.351242
51309	ARMCX1	-0.54177	-0.66386	0.038919	0.00034239	-2.0929	0.0011029		9140	ATG12	3.73e-05	-0.378779
3934	LCN2	1.2353	1.2772	0.026449	0.00083461	2.0487	0.0012789		23300	ASCIZ	0.0127	-0.250962
5197	PF4V1	2.042	1.6663	0.0060605	0.0044275	2.0368	0.0013258		23287	AGTPBP1	0.00122	-0.750075
79134	TMEM185B	0.40313	0.50061	0.029518	0.00077224	2.0391	0.0013258		9689	BZW1	0.00135	-0.439271
10906	TRAFD1	0.43775	0.43961	0.026033	0.00097871	2.0306	0.0013414		23215	BAT2D1	0.00905	0.295712
90231	KIAA2013	0.30112	0.27868	0.0091	0.0037065	2.0037	0.0015461		581	BAX	0.035	0.19543
79888	LPCAT1	0.39978	0.4419	0.0186	0.0019153	1.9962	0.0015848		7439	BEST1	0.0095	-0.311799
7332	UBE2L3	0.41115	0.50473	0.026098	0.0013472	1.9882	0.0016369		10904	BLCAP	0.00238	-0.294899
2289	FKBP5	0.61686	0.82181	0.037917	0.00080414	1.9895	0.0016369		624	BDKRB2	0.0102	-0.280496
51266	CLEC1B	1.6513	1.3221	0.0054474	0.0064385	1.9871	0.0016369		80135	BXDC5	0.00625	-0.329312
375757	SWI5	0.48476	0.4601	0.015546	0.0025058	1.9836	0.0016369		84464	BTBD12	4.55e-06	0.933932
85313	PPIL4	-0.43997	-0.35659	0.011988	0.0032669	-1.9817	0.0016369		90135	BTBD6	2.42e-05	0.750796
9334	B4GALT5	0.67717	0.54821	0.014027	0.0029818	1.9735	0.0016371		10519	CIB1	7.05e-05	0.498434
1497	CTNS	0.34867	0.40965	0.01736	0.0026239	1.9601	0.0017779		10241	CALCOCO2	0.00328	-0.354162
4778	NFE2	1.1148	1.1833	0.036078	0.0010418	1.965	0.0017839		9586	CREB5	0.00574	-0.337507
84519	ACRBP	1.0681	0.85321	0.0018402	0.0020492	2.3772	0.0017839		847	CAT	0.0398	-0.32211
10548	TM9SF1	0.23747	0.34925	0.028124	0.001564	1.9551	0.0017987		5476	CTSA	2.31e-05	0.571095
55147	RBM23	0.44693	0.4568	0.023807	0.0020133	1.9484	0.0018233		1520	CTSS	5.81e-06	-0.829224
9848	MFAP3L	0.58524	0.51755	0.012296	0.0040998	1.944	0.0018346		961	CD47	0.00435	-0.375589
147199	SCGB1C1	1.058	1.0209	0.052003	0.00062379	1.9596	0.0018706		975	CD81	3.92e-06	0.895309
5816	PVALB	1.0428	0.96754	0.033374	0.0014046	1.9398	0.0019112		56882	CDC42SE1	0.0439	0.206454
6503	SLA	0.62042	0.56329	0.015857	0.0037195	1.923	0.0019958		57396	CLK4	0.000229	-0.597979
375748	ERCC6L2	-0.40041	-0.29123	0.012429	0.0046058	-1.9254	0.0019958		113130	CDCA5	0.0148	0.285417
55768	NGLY1	-0.38764	-0.39423	0.022348	0.0030172	-1.9019	0.0023156		1381	CRABP1	0.0463	-0.250099
4541	MT-ND6	1.0495	0.95654	0.0098463	0.0068628	1.8932	0.0024977		80254	CEP63	0.0277	0.204261
57704	GBA2	0.52145	0.41051	0.0094849	0.0072659	1.8889	0.0025528		869	CBLN1	0.0232	-0.214696
81579	PLA2G12A	0.5441	0.74415	0.048766	0.0002365	2.0832	0.0026759		51148	CERCAM	0.021	0.233611
80301	PLEKHO2	0.45203	0.41597	0.032808	0.0024226	1.8677	0.0028843		2829	XCR1	5.81e-06	0.805209
100130938	100130938	1.1865	1.0317	0.014902	0.0058703	1.8631	0.0028899		1232	CCR3	8.6e-05	0.654311
116447	TOP1MT	-0.20174	-0.26432	0.040175	0.0020313	-1.8591	0.0030304		1186	CLCN7	0.00559	0.345112
8969	H2AC11	1.1605	1.1554	0.026386	0.0036071	1.8486	0.0030304		56994	CHPT1	0.0322	-0.350159
3601	IL15RA	0.37814	0.42212	0.029451	0.0031468	1.8495	0.0030304		25978	CHMP2B	0.00103	-0.453887
23324	MAN2B2	0.26059	0.21814	0.0091197	0.0092944	1.8526	0.0030304		51510	CHMP5	0.0112	-0.290038
8436	CAVIN2	0.99448	1.1327	0.030307	0.003003	1.8519	0.0030304		55182	C1orf164	1.68e-06	0.746646
257019	FRMD3	1.0052	0.87042	0.0095931	0.0091724	1.8476	0.0030888		10712	C1orf2	0.0137	0.266624
8814	CDKL1	0.26346	0.32393	0.039477	0.0025959	1.8282	0.0034563		57035	C1orf63	0.026	0.350431
643977	FLJ32255	0.57176	0.53133	0.015052	0.0075486	1.822	0.0034563		55248	C1orf75	2.49e-06	0.961318
6737	TRIM21	0.50825	0.78961	0.076647	0.00086474	1.8444	0.0034563		26098	C10orf137	5.96e-05	0.729075
23780	APOL2	0.26428	0.31488	0.065981	0.0011495	1.8402	0.0034563		54838	C10orf26	0.0293	-0.182202
100507398	INTS6-AS1	-0.46305	-0.46137	0.029511	0.0038968	-1.8193	0.0034683		10944	C11orf58	0.000158	-0.406729
4211	MEIS1	0.80943	0.60959	0.011003	0.010311	1.8121	0.0037331		51275	C12orf47	0.00235	0.263891
23208	SYT11	0.34921	0.47383	0.066105	0.0013977	1.8163	0.0038544		84934	C12orf52	0.0232	0.298614
80741	LY6G5C	0.63328	0.51705	0.0028446	0.0050478	2.1475	0.0041483		51528	C14orf100	0.00469	-0.394191
90139	TSPAN18	0.4722	0.34521	0.024646	0.0061175	1.7828	0.0043475		51241	C14orf112	0.032	-0.246268
10435	CDC42EP2	0.4063	0.51564	0.068971	0.0015905	1.7923	0.0044476		51187	C15orf15	0.0192	-0.319715
1601	DAB2	0.58201	0.49	0.020512	0.0078038	1.7736	0.004565		56851	C15orf24	0.0139	-0.234773
130589	GALM	0.44946	0.38248	0.017654	0.008931	1.7731	0.004565		283987	C17orf28	9.93e-05	0.509876
123722	FSD2	-0.17346	-0.28615	0.07071	0.0016466	-1.7826	0.0046236		23587	C17orf81	0.00056	-0.598835
114899	C1QTNF3	-0.29368	-0.30201	0.080724	0.0014022	-1.7796	0.0048092		83608	C18orf21	0.0211	-0.33937
64398	MPP5	-0.3329	-0.29722	0.008962	0.015481	-1.7694	0.0048319		55009	C19orf24	0.0079	0.173207
54623	PAF1	0.35623	0.251	0.019366	0.0093101	1.7527	0.0049244		56006	C19orf61	0.000191	0.672114
3300	DNAJB2	0.33719	0.26933	0.02715	0.0067683	1.7533	0.0049244		79183	C20orf121	0.000802	0.63379
11040	PIM2	0.48316	0.6007	0.082352	0.0014673	1.7705	0.0049244		140833	C20orf61	0.000731	0.468504
6322	SCML1	-0.50676	-0.66173	0.07775	0.0016318	-1.767	0.0049244		57186	C20orf74	5.81e-06	0.803095
6678	SPARC	1.4538	1.0698	0.0038488	0.007753	2.0276	0.0051083		94104	C21orf66	0.000293	-0.688496
8402	SLC25A11	0.4712	0.28154	0.044344	0.0040585	1.7483	0.0051083		25775	C22orf24	5.8e-06	0.9205
54472	TOLLIP	0.28962	0.23157	0.024941	0.0078655	1.7429	0.0051083		64417	C5orf28	1.31e-05	0.704516
83699	SH3BGRL2	0.55755	0.45988	0.023007	0.0091006	1.7337	0.0054494		64771	C6orf106	0.0092	0.288071
56911	MAP3K7CL	1.1809	1.4889	0.027711	5.6e-05	2.3859	0.0058306		81688	C6orf62	2.83e-05	-0.427006
23	ABCF1	0.42721	0.38317	0.014632	0.015308	1.7113	0.006292		63027	C6orf85	0.000145	0.534194
2040	STOM	0.35085	0.40351	0.033718	0.0075448	1.7049	0.006292		79017	C7orf24	0.00108	-0.442083
2791	GNG11	1.0679	1.1082	0.038973	0.0064652	1.7052	0.006292		51622	C7orf28A	0.00548	-0.318331
7292	TNFSF4	1.0069	1.0295	0.042735	0.0057268	1.7082	0.006292		56988	C8orf17	1.21e-06	0.773985
81552	VOPP1	0.23611	0.24994	0.038426	0.0065293	1.7061	0.006292		84302	C9orf125	3.92e-06	0.835282
51275	MAPKAPK5-AS1	-0.27102	-0.28505	0.055183	0.0040827	-1.7107	0.006292		51531	C9orf156	0.00126	-0.275103
90799	CEP95	-0.37531	-0.79794	0.078529	0.00052235	-1.8966	0.006292		51759	C9orf78	0.0194	0.221691
27436	EML4	-0.38335	-0.48503	0.048351	0.0050929	-1.7027	0.0063746		54918	CMTM6	0.0235	-0.298875
55274	PHF10	-0.3552	-0.27564	0.023733	0.010876	-1.702	0.0063746		79780	CCDC82	0.000348	-0.7091
3043	HBB	0.81963	1.3146	0.059205	0.0040502	1.7007	0.0065369		84142	CCDC98	0.0262	-0.309492
55585	UBE2Q1	0.2166	0.25554	0.047171	0.0056806	1.6922	0.0067673		23412	COMMD3	0.0389	-0.252408
5580	PRKCD	1.0387	0.69597	0.010623	0.020756	1.696	0.0068423		8895	CPNE3	6.11e-07	0.89061
5874	RAB27B	0.7157	0.69954	0.034358	0.0083644	1.6867	0.0068423		51340	CRNKL1	0.00196	-0.420752
6184	RPN1	0.25541	0.23266	0.019332	0.014126	1.6875	0.0068449		1407	CRY1	0.0188	-0.306699
55149	MTPAP	-0.35916	-0.22668	0.0096718	0.022563	-1.6915	0.007039		8452	CUL3	0.000205	-0.542268
148932	MOB3C	0.2759	0.48674	0.059205	0.0047807	1.6796	0.0072485		8065	CUL5	0.000216	-0.390957
5358	PLS3	0.48408	0.4995	0.031745	0.010202	1.6681	0.0075		55832	CAND1	0.00587	-0.358093
54957	TXNL4B	0.4631	0.46781	0.025278	0.012535	1.6693	0.0075		1018	CDK3	0.000636	-0.555293
79837	PIP4K2C	0.23476	0.30444	0.051916	0.0059287	1.6707	0.0075		1540	CYLD	0.00559	-0.367125
9654	TTLL4	0.23247	0.19797	0.048723	0.0068059	1.661	0.0078542		51700	CYB5R2	0.0121	-0.394423
9295	SRSF11	-0.34689	-0.43294	0.027109	0.012594	-1.6594	0.0078542		51167	CYB5R4	9.93e-05	-0.68433
51062	ATL1	0.44488	0.56932	0.070288	0.0042632	1.6638	0.0078542		9391	CIAO1	0.0196	-0.240902
27439	TMEM121B	0.49281	0.61352	0.098617	0.0024989	1.6715	0.0078542		8642	DCHS1	0.000211	0.363168
1027	CDKN1B	-0.45057	-0.35557	0.016406	0.018906	-1.6607	0.0078849		9879	DDX46	0.0129	-0.415226
54741	LEPROT	0.38319	0.36212	0.055941	0.0061768	1.6531	0.0081633		1655	DDX5	0.00186	-0.606271
51187	RSL24D1	-0.32729	-0.43806	0.098692	0.002858	-1.6542	0.0086876		79009	DDX50	1.22e-06	-0.51858
8204	NRIP1	-0.78031	-0.62394	0.0036597	0.008345	-2.0352	0.0088443		1665	DHX15	5.66e-05	-0.74854
808	CALM3	0.41209	0.21075	0.010988	0.026887	1.6457	0.0088641		9704	DHX34	3.47e-07	1.00828
384	ARG2	0.67854	0.42638	0.01152	0.02605	1.6452	0.0088641		9732	DOCK4	0.0386	-0.232312
8698	S1PR4	0.44425	0.45717	0.064352	0.0057804	1.6396	0.0088641		1674	DES	0.00702	0.422733
79147	FKRP	0.2778	0.24882	0.068361	0.0054668	1.6367	0.0089776		284649	DKFZP564C196	5.81e-06	0.645517
51430	SUCO	-0.39949	-0.27687	0.056263	0.0071004	-1.6333	0.0089875		1789	DNMT3B	3.26e-06	0.763774
1820	ARID3A	0.49914	0.36375	0.029497	0.014034	1.6297	0.0090654		29947	DNMT3L	7.79e-05	0.698385
8459	TPST2	0.43167	0.41331	0.018558	0.020859	1.6281	0.0093013		51207	DUSP13	3.43e-05	0.535797
79932	KIAA0319L	0.32301	0.30772	0.08262	0.0044819	1.631	0.0093013		1848	DUSP6	0.006	-0.493442
81027	TUBB1	1.0548	1.0148	0.029299	0.014992	1.6206	0.0094948		84062	DTNBP1	0.048	-0.201149
10169	SERF2	0.22555	0.15367	0.02457	0.017409	1.6211	0.0094948		1870	E2F2	0.0215	0.301287
56952	PRTFDC1	1.041	0.82799	0.0067996	0.018754	1.7835	0.0094963		55837	EAPP	0.00106	-0.389197
64777	RMND5B	0.34317	0.31368	0.057661	0.0078533	1.6149	0.0098329		2000	ELF4	0.000175	0.608213
8555	CDC14B	0.3723	0.31837	0.02378	0.018754	1.6139	0.0098581		1958	EGR1	2.53e-06	0.847341
5119	CHMP1A	0.42381	0.25358	0.0077341	0.021495	1.7398	0.0098675		27436	EML4	0.0288	-0.40321
55281	TMEM140	1.1109	1.2414	0.018038	1.9e-05	2.6366	0.010033		2124	EVI2B	0.00333	-0.464676
140691	TRIM69	0.26167	0.39137	0.14579	0.0019463	1.6267	0.010197		60401	EDA2R	3.99e-06	1.0294
55911	APOBR	0.65438	0.41322	0.011479	0.031208	1.6112	0.010425		953	ENTPD1	8.96e-07	0.952433
3485	IGFBP2	0.54905	0.48039	0.10752	0.0035718	1.612	0.010425		114327	EFHC1	0.01	-0.373862
150290	DUSP18	0.23717	0.20045	0.043052	0.012447	1.5943	0.010802		22979	EFR3B	0.00385	-0.379131
23381	SMG5	0.25986	0.25174	0.041106	0.013069	1.594	0.010802		2110	ETFDH	0.022	-0.312708
84456	L3MBTL3	-0.42378	-0.42167	0.062139	0.0086072	-1.5906	0.011159		57222	ERGIC1	0.0445	0.184184
10098	TSPAN5	0.29045	0.30791	0.041827	0.013653	1.5848	0.011384		56943	ENY2	0.0245	-0.276847
84975	MFSD5	0.37835	0.28251	0.041827	0.013732	1.584	0.011384		1894	ECT2	0.000902	0.401103
54832	VPS13C	-0.3064	-0.25037	0.014012	0.030671	-1.5924	0.011384		55500	ETNK1	0.021	-0.25234
80012	PHC3	-0.37012	-0.334	0.04215	0.014341	-1.5762	0.011424		9538	EI24	1.47e-05	0.726426
740	MRPL49	0.35693	0.32033	0.016532	0.029208	1.5824	0.011424		9521	EEF1E1	0.00333	-0.469991
10263	CDK2AP2	0.54711	0.52484	0.043784	0.013798	1.5758	0.011424		440275	EIF2AK4	0.00414	-0.36133
79699	ZYG11B	-0.27442	-0.19646	0.021603	0.024573	-1.5821	0.011424		2130	EWSR1	0.000117	0.551816
9774	BCLAF1	-0.32203	-0.41731	0.13584	0.0015153	-1.6682	0.011424		55572	FOXRED1	0.00875	0.235779
6374	CXCL5	0.98419	0.99278	0.081521	0.0066878	1.5805	0.011424		2222	FDFT1	0.0164	0.221892
56271	BEX4	-0.3914	-0.52509	0.15351	0.0022912	-1.597	0.011424		22868	FASTKD2	0.0125	-0.429829
51186	TCEAL9	0.69824	0.6844	0.063234	0.0090023	1.5811	0.011424		79152	FA2H	0.000764	0.438256
55343	SLC35C1	0.15103	0.2279	0.060232	0.0098448	1.5769	0.011424		2354	FOSB	0.0208	0.26329
10025	MED16	0.34678	0.27028	0.0042266	0.011257	1.963	0.011434		55294	FBXW7	0.0175	-0.336577
5326	PLAGL2	0.49072	0.55766	0.041217	8.67e-05	2.2398	0.011499		26271	FBXO5	0.0227	-0.195744
2268	FGR	0.49046	0.25905	0.01161	0.033426	1.5987	0.011586		26268	FBXO9	0.0234	-0.309277
3329	HSPD1	-0.21023	-0.17054	0.033291	0.018314	-1.5711	0.011608		53834	FGFRL1	3.42e-06	0.789182
3797	KIF3C	0.38819	0.23493	0.014641	0.032676	1.5758	0.011836		2197	FAU	0.00676	0.501427
80745	THUMPD2	-0.29269	-0.43351	0.14628	0.0017798	-1.6354	0.012055		2346	FOLH1	3.15e-05	0.474876
26277	TINF2	0.32926	0.3935	0.038646	0.016928	1.5629	0.012117		10772	FUSIP1	0.0109	-0.3844
10427	SEC24B	-0.40231	-0.262	0.01406	0.034378	-1.5698	0.012179		2533	FYB	0.00146	-0.728521
54921	CHTF8	0.16883	0.1565	0.04613	0.014435	1.5611	0.012179		2874	GPS2	0.00364	0.312769
5473	PPBP	0.72715	0.6603	0.022179	0.026798	1.5626	0.012276		8843	GPR109B	1.91e-06	0.755389
378938	MALAT1	-0.72403	-0.57616	0.027418	0.023654	-1.5559	0.012681		8477	GPR65	0.00052	-0.586011
9150	CTDP1	0.3426	0.2166	0.018817	0.030996	1.5552	0.013062		29997	GLTSCR2	0.0234	0.428704
55013	MCUB	-0.2534	-0.18379	0.036925	0.019241	-1.5487	0.013102		2950	GSTP1	0.000378	0.414915
23232	TBC1D12	-0.3107	-0.46021	0.1383	0.0014831	-1.6663	0.013296		51031	GLOD4	0.0238	-0.2929
51334	PRR16	0.44434	0.33124	0.023788	0.027883	1.5456	0.013587		9527	GOSR1	0.000478	-0.39615
81037	CLPTM1L	0.1786	0.15202	0.041411	0.018448	1.5399	0.013766		8522	GAS7	3.47e-05	0.679703
93129	ORAI3	0.26944	0.42778	0.12952	0.004524	1.55	0.013791		23560	GTPBP4	0.00264	-0.418209
145567	TTC7B	1.1931	0.80466	0.00951	0.029209	1.6579	0.014176		54552	GNL3L	0.00659	-0.29532
157695	TDRP	0.57342	0.45338	0.039544	0.019928	1.5335	0.014176		3313	HSPA9	0.0147	-0.383897
10020	GNE	-0.31077	-0.32307	0.052815	0.015017	-1.5345	0.014176		51191	HERC5	0.00699	-0.486651
51514	DTL	0.58616	0.72561	0.15083	0.0037099	1.5447	0.014464		83872	HMCN1	7.97e-06	0.734508
2017	CTTN	0.77525	0.53423	0.0055821	0.016729	1.8507	0.014681		3055	HCK	0.00625	-0.283349
286464	CFAP47	-0.19823	-0.19961	0.047835	0.018037	-1.5209	0.015301		3068	HDGF	0.0232	0.223906
140890	SREK1	-0.27337	-0.24393	0.02474	0.03039	-1.5241	0.015301		3178	HNRNPA1	0.0257	-0.375162
27351	DESI1	0.39653	0.22718	0.0080088	0.025245	1.7143	0.015301		220988	HNRPA3	0.00144	0.488583
124446	TMEM219	0.3487	0.30501	0.05558	0.015803	1.5198	0.015301		9987	HNRPDL	0.00829	-0.314897
10379	IRF9	0.67687	0.55882	0.035734	0.024072	1.5178	0.015414		3189	HNRPH3	0.00184	-0.467342
9907	AP5Z1	0.17992	0.22362	0.12721	0.0056294	1.5265	0.015414		3151	HMGN2	0.00199	-0.374937
5526	PPP2R5B	0.33254	0.25904	0.0041106	0.011834	1.9673	0.015483		54435	HCG4	0.00315	0.24176
8365	H4C8	0.95904	0.6561	0.029497	0.028111	1.5153	0.015704		3141	HLCS	0.00315	0.458931
26052	DNM3	0.55739	0.48929	0.034828	0.02598	1.5079	0.016189		3221	HOXC4	0.0446	0.223173
3553	IL1B	2.2053	1.2671	0.024095	0.033468	1.5103	0.016189		79618	HMBOX1	0.0415	0.202046
7035	TFPI	0.51552	0.40437	0.036301	0.025257	1.5068	0.016189		3054	HCFC1	0.00951	-0.391739
65979	PHACTR4	0.49487	0.22083	0.02126	0.036413	1.5116	0.016189		7923	HSD17B8	0.0394	0.267429
10904	BLCAP	0.35293	0.36407	0.13878	0.0053111	1.5172	0.016189		440863	LOC440863	7.2e-06	0.871986
23244	PDS5A	-0.31562	-0.2544	0.072904	0.012944	-1.5064	0.016189		554202	LOC554202	2.04e-05	0.589342
8727	CTNNAL1	0.64703	0.52063	0.044809	0.021495	1.503	0.016252		151534	LOC151534	3.13e-05	0.682116
84936	ZFYVE19	0.32187	0.24331	0.021185	0.037166	1.5085	0.016252		90113	LOC90113	0.000702	0.476502
25915	NDUFAF3	0.37521	0.40095	0.10171	0.0087299	1.5078	0.016252		197319	FLJ12986	0.017	-0.198949
23193	GANAB	0.51188	0.50211	0.10962	0.0079187	1.5077	0.016252		79701	FLJ22222	0.00746	0.340525
79665	DHX40	-0.27897	-0.26777	0.040278	0.024083	-1.5011	0.016378		651900	LOC651900	0.033	0.18387
84786	84786	-0.41279	-0.38479	0.086709	0.011171	-1.5014	0.016481		3251	HPRT1	0.00039	-0.405207
8542	APOL1	0.30905	0.34998	0.12279	0.0071041	1.5026	0.016884		22876	INPP5F	9.51e-07	0.878031
83939	EIF2A	-0.23097	-0.32724	0.14776	0.005349	-1.5049	0.017015		3667	IRS1	0.000127	-0.607763
4066	LYL1	0.41764	0.39148	0.04412	0.023247	1.4929	0.017089		65123	INTS3	0.00315	-0.253006
150372	NFAM1	0.33368	0.4049	0.16467	0.0044714	1.5058	0.017111		3459	IFNGR1	3.47e-05	-0.772564
51390	AIG1	0.27757	0.23214	0.036457	0.027541	1.4913	0.017231		10581	IFITM2	0.00222	0.403276
94235	GNG8	0.44678	0.31606	0.054126	0.019619	1.4897	0.017231		84818	IL17RC	3.84e-06	0.653282
3895	KTN1	-0.30066	-0.4685	0.086975	0.012148	-1.4887	0.017467		3570	IL6R	3.26e-06	0.82665
10863	ADAM28	-0.38503	-0.58765	0.16826	0.0044473	-1.5016	0.017467		50939	IMPG2	0.0362	0.216547
1616	DAXX	0.31203	0.4362	0.082817	0.012944	1.4873	0.017523		90410	IFT20	1.93e-06	0.803981
4615	MYD88	0.29271	0.23431	0.026167	0.035645	1.4887	0.017553		51098	IFT52	3.92e-06	0.587016
197320	ZNF778	0.16805	0.22418	0.072904	0.015447	1.4811	0.018095		43849	KLK12	0.000108	0.530121
29933	GPR132	0.38615	0.41779	0.052421	0.022254	1.4741	0.018926		27252	KLHL20	0.00587	-0.531017
171558	PTCRA	0.46822	0.29347	0.01736	0.047734	1.482	0.019021		401265	KLHL31	0.0148	0.215639
3399	ID3	-0.72874	-0.64382	0.013506	0.042483	-1.5403	0.019054		3875	KRT18	0.0175	0.152629
57419	SLC24A3	1.2278	0.81597	0.022348	0.042308	1.4768	0.019147		9897	KIAA0196	0.00988	-0.35093
170506	DHX36	-0.45826	-0.44697	0.016701	0.050203	-1.4767	0.019284		23392	KIAA0368	0.00505	-0.329013
51471	NAT8B	1.165	0.80527	0.0035635	0.010638	2.0199	0.019284		23074	KIAA0701	0.00619	-0.353172
22937	SCAP	0.27763	0.21699	0.045226	0.026297	1.469	0.019284		23329	KIAA0984	2.68e-05	0.673003
2193	FARSA	0.42281	0.50932	0.1521	0.0064215	1.4767	0.019284		26128	KIAA1279	7.95e-05	0.588137
53	ACP2	0.4161	0.59804	0.10736	0.010794	1.4701	0.019284		57670	KIAA1549	0.0484	0.278157
10637	LEFTY1	0.3587	0.30438	0.069824	0.017546	1.4687	0.019284		85462	KIAA1727	6.51e-06	0.861734
27252	KLHL20	-0.23688	-0.28197	0.11472	0.00076294	-1.7748	0.0193		90231	KIAA2013	0.00851	0.236341
81608	FIP1L1	-0.25653	-0.21722	0.054211	0.022924	-1.465	0.01932		3834	KIF25	1.81e-05	0.784799
1796	DOK1	0.42976	0.33681	0.026753	0.039391	1.4677	0.019453		3800	KIF5C	0.0234	0.257583
113878	DTX2	0.46187	0.17984	0.019533	0.047289	1.4702	0.019464		22920	KIFAP3	0.006	-0.362304
399761	BMS1P1	-0.45149	-0.25266	0.029451	0.037209	-1.4655	0.019464		688	KLF5	0.017	-0.322677
4751	NEK2	0.34338	0.27947	0.033017	0.034527	1.4638	0.019481		1316	KLF6	9.51e-07	0.952264
26586	CKAP2	-0.30605	-0.40325	0.091254	0.013798	-1.4629	0.019481		11279	KLF8	1.22e-06	0.863152
57110	PLAAT1	0.98033	0.55084	0.025417	0.041335	1.4644	0.019615		8942	KYNU	0.0322	-0.35449
23683	PRKD3	-0.37828	-0.28595	0.03702	0.032541	-1.4602	0.019679		3939	LDHA	0.000522	-0.471291
79930	DOK3	0.39781	0.3755	0.10646	0.011746	1.4605	0.019809		89782	LMLN	0.000309	0.403069
9645	MICAL2	0.40312	0.33954	0.11886	0.010194	1.4604	0.019965		51056	LAP3	0.0161	-0.386281
51251	NT5C3A	0.57668	0.47811	0.027309	0.040706	1.4588	0.020052		64175	LEPRE1	4.57e-06	0.859784
11252	PACSIN2	0.31177	0.23515	0.1891	0.0048596	1.4671	0.020374		3976	LIF	0.0333	-0.173085
3035	HARS1	0.25984	0.17909	0.056561	0.024203	1.451	0.020464		3975	LHX1	0.000527	0.5976
80263	TRIM45	-0.18461	-0.16616	0.042047	0.031208	-1.4503	0.020605		64900	LPIN3	0.01	0.215734
374739	TEPP	-0.32015	-0.19879	0.027709	0.041538	-1.4526	0.020605		10186	LHFP	0.0337	-0.18061
81619	TSPAN14	0.23289	0.31275	0.19005	0.004952	1.4634	0.020605		55788	LMBRD1	0.000133	-0.449303
22921	MSRB2	0.35508	0.44668	0.18992	0.0050395	1.4616	0.02077		91694	LONRF1	0.0492	0.20565
114908	TMEM123	-0.46826	-0.20163	0.019073	0.051774	-1.4547	0.020798		3949	LDLR	0.01	0.291434
654434	SNHG20	0.48334	0.44829	0.027309	0.042563	1.45	0.020798		4033	LRMP	0.00449	-0.377289
5577	PRKAR2B	0.9789	0.87953	0.046608	0.029703	1.4442	0.021043		4017	LOXL2	0.0485	0.288597
23331	TTC28	-0.34595	-0.23425	0.031826	0.040212	-1.4418	0.021434		9961	MVP	0.00111	0.316758
64090	GAL3ST2	-0.16166	-0.19407	0.11731	0.01183	-1.443	0.021434		4515	MTCP1	0.0402	-0.213636
5159	PDGFRB	0.42406	0.41686	0.057989	0.025257	1.4404	0.021434		9443	MED7	0.0263	-0.237864
23765	IL17RA	0.33555	0.38772	0.17262	0.0065293	1.4498	0.021434		84939	MUM1	0.000859	0.433846
100505494	100505494	-0.30683	-0.24613	0.052003	0.027729	-1.4399	0.021434		54708	MARCHF5	0.018	-0.332555
8837	CFLAR	0.2896	0.32544	0.18586	0.0057691	1.4504	0.021589		4223	MEOX2	6.7e-06	0.785785
130106	CIB4	-0.17308	-0.30872	0.18405	0.0060238	-1.4468	0.022015		8930	MBD4	0.0281	-0.469329
445	ASS1	0.26382	0.30072	0.17636	0.0066119	1.4445	0.02209		51108	METTL9	0.0314	-0.347275
153643	FAM81B	0.86399	0.73754	0.071162	0.021708	1.4328	0.022121		92312	MEX3A	0.000276	0.555534
254531	LPCAT4	0.18491	0.21891	0.10752	0.013983	1.4343	0.02218		54148	MRPL39	0.0167	-0.338388
84067	FAM160A2	0.23836	0.28474	0.13554	0.010425	1.4352	0.022447		64975	MRPL41	0.00259	0.385943
10626	TRIM16	0.44702	0.26433	0.012834	0.043164	1.5487	0.022568		64960	MRPS15	0.0427	0.23195
2997	GYS1	0.30288	0.2966	0.087117	0.018403	1.4288	0.022574		4216	MAP3K4	0.012	-0.246899
11179	ZNF277	-0.26472	-0.18156	0.047613	0.032919	-1.4226	0.02335		11183	MAP4K5	0.00713	-0.304654
115861	NXNL1	-0.19168	-0.28048	0.18815	0.0026063	-1.5354	0.02335		22877	MLXIP	0.000129	0.541469
9046	DOK2	0.51664	0.33584	0.050772	0.031291	1.4221	0.02335		10933	MORF4L1	0.000474	-0.517186
340146	SLC35D3	0.63069	0.69153	0.097812	0.016798	1.424	0.02335		51001	MTERFD1	0.00713	-0.476104
523	ATP6V1A	0.29226	0.44872	0.20102	0.005678	1.4349	0.023469		57192	MCOLN1	0.000351	0.490094
10421	CD2BP2	0.22981	0.22312	0.024764	0.051486	1.4245	0.023744		23077	MYCBP2	0.0035	-0.409437
23170	TTLL12	0.22818	0.29063	0.15744	0.0015369	1.6329	0.023744		4617	MYF5	0.00104	0.42031
2210	FCGR1B	0.63909	0.89881	0.11776	0.014297	1.416	0.024617		4649	MYO9A	9.71e-06	0.83254
4820	NKTR	-0.60748	-0.51148	0.03357	0.044622	-1.4145	0.024843		84700	MYO18B	0.0104	-0.245423
29842	TFCP2L1	-0.23471	-0.27613	0.13411	0.012416	-1.4141	0.025084		55577	NAGK	2.03e-05	0.751096
10507	SEMA4D	0.43528	0.4011	0.04519	6.97e-05	2.2521	0.025117		427	ASAH1	0.000103	-0.725655
29094	LGALSL	0.88898	0.76341	0.04475	0.037481	1.4095	0.02516		9476	NAPSA	2.62e-07	0.999654
9764	KIAA0513	0.34904	0.34928	0.082787	0.022582	1.4049	0.025807		83955	NACAP1	0.00255	-0.396538
26164	MTG2	0.11212	0.17004	0.22383	0.0042521	1.4449	0.025878		4818	NKG7	2.83e-05	0.729373
253959	RALGAPA1	-0.28047	-0.15724	0.021724	0.060974	-1.4083	0.026176		4862	NPAS2	1.9e-05	0.663506
22854	NTNG1	-0.10264	-0.19069	0.1979	0.002888	-1.5124	0.026176		4923	NTSR1	0.0073	-0.305626
55841	WWC3	0.39734	0.27179	0.087512	0.021906	1.4009	0.026176		4908	NTF3	0.0303	-0.172946
1456	CSNK1G3	-0.17776	-0.26944	0.2074	0.0033253	-1.4873	0.026176		91624	NEXN	1.36e-06	0.810592
85440	DOCK7	-0.21873	-0.23055	0.10104	0.018734	-1.4028	0.026176		55768	NGLY1	0.0211	-0.256575
23205	ACSBG1	0.49694	0.28362	0.02116	0.062008	1.4074	0.026343		4837	NNMT	9.78e-06	0.753667
639	PRDM1	0.50969	0.38009	0.036018	0.046051	1.3998	0.026508		4752	NEK3	9.45e-06	0.685653
55666	NPLOC4	0.34873	0.17528	0.021922	0.061391	1.4058	0.026508		10783	NEK6	3.1e-06	0.843339
10988	METAP2	-0.31382	-0.20593	0.021917	0.061885	-1.404	0.026594		51199	NIN	4.91e-06	0.89835
80331	DNAJC5	0.28723	0.28364	0.078567	0.02521	1.3961	0.026594		51070	NOSIP	0.0087	0.464616
89872	AQP10	0.86188	0.67138	0.1031	0.019202	1.3953	0.026823		81614	NIPA2	3.73e-05	-0.588374
11168	PSIP1	-0.3629	-0.27409	0.035566	0.047972	-1.3939	0.027422		54780	NSMCE4A	0.000165	0.551209
256302	NATD1	0.25088	0.28645	0.17056	0.0017911	1.5986	0.027479		25926	NOL11	0.00963	-0.411398
170589	GPHA2	-0.1729	-0.2276	0.16725	0.010679	-1.3939	0.028073		4691	NCL	0.000861	-0.411811
55072	RNF31	0.25688	0.13392	0.034459	0.050314	1.3889	0.028316		55746	NUP133	0.00199	-0.428638
7408	VASP	0.55914	0.28466	0.026516	0.058814	1.3909	0.028321		23165	NUP205	8.23e-05	-0.561826
54432	YIPF1	0.34882	0.22896	0.029395	0.055497	1.3895	0.028321		91181	NUP210L	7.54e-06	0.693417
24137	KIF4A	0.34842	0.22777	0.02101	0.066565	1.394	0.028396		79902	NUP85	0.00468	-0.315172
2232	FDXR	0.38383	0.34764	0.046015	0.042101	1.3845	0.028405		4927	NUP88	0.0462	-0.254607
84174	SLA2	0.44444	0.3118	0.0093496	0.035532	1.6421	0.02911		4673	NAP1L1	4.44e-05	-0.629699
4627	MYH9	0.25919	0.19878	0.027102	0.060694	1.3822	0.02911		8650	NUMB	0.000718	0.32453
80763	SPX	0.88617	0.59784	0.026543	0.060843	1.3838	0.02911		29789	OLA1	0.00118	-0.537397
253260	RICTOR	-0.44112	-0.48125	0.15787	0.012701	-1.382	0.02911		10439	OLFM1	0.000484	0.380819
255022	CALHM1	-0.18523	-0.2097	0.072693	0.030135	-1.3779	0.02911		29095	ORMDL2	3.14e-06	0.705026
10276	NET1	-0.44252	-0.34933	0.078114	0.028524	-1.3766	0.02911		28962	OSTM1	4.49e-07	1.05092
9770	RASSF2	0.38573	0.3071	0.13806	0.015311	1.3803	0.02911		51633	OTUD6B	0.00412	0.370958
9034	CCRL2	0.43225	0.59036	0.20676	0.0079877	1.3875	0.02911		56288	PARD3	0.0421	0.224061
219670	ENKUR	0.49268	0.48816	0.10355	0.021475	1.3781	0.02911		79728	PALB2	0.00593	-0.232484
9546	APBA3	0.29032	0.23409	0.085929	0.026421	1.3755	0.029174		4951	LOC4951	0.00141	-0.504519
858	CAV2	0.49084	0.3769	0.15149	0.013821	1.378	0.029539		50640	PNPLA8	1.77e-05	-0.902037
9632	SEC24C	0.47086	0.27219	0.029389	0.059206	1.3767	0.029903		5829	PXN	0.0413	-0.223438
6241	RRM2	0.60576	0.9115	0.24332	0.0060323	1.3868	0.02995		5129	PCTK3	1.59e-05	0.73901
27429	HTRA2	0.29332	0.27498	0.063961	0.035623	1.3688	0.030333		64236	PDLIM2	0.00485	0.314843
221178	SPATA13	-0.17068	-0.2479	0.18933	0.010194	-1.3751	0.030728		79849	PDZD3	0.00236	0.320722
11035	RIPK3	0.24647	0.33522	0.089423	0.027004	1.3662	0.030759		22990	PCNX	0.000766	0.490462
6643	SNX2	-0.4273	-0.21963	0.0091323	0.035594	-1.6469	0.03115		57161	PELI2	1.07e-05	0.722689
2157	F8	0.33118	0.4541	0.2021	0.0092166	1.3735	0.03115		55037	PTCD3	0.00625	-0.385656
5879	RAC1	0.23903	0.17817	0.036848	0.054698	1.3648	0.031319		5108	PCM1	0.000397	-0.757605
3385	ICAM3	0.43393	0.1943	0.041106	0.051074	1.3637	0.031319		10935	PRDX3	0.0262	-0.39931
4149	MAX	0.70079	0.4448	0.0017256	0.005229	2.3021	0.031319		9588	PRDX6	0.0465	-0.193857
84771	DDX11L2	1.3002	0.90019	0.031122	0.060495	1.3658	0.031319		5191	PEX7	0.00684	-0.34918
23314	SATB2	0.16377	0.28647	0.20242	0.0093957	1.3706	0.031319		8622	PDE8B	0.037	-0.287011
124583	CANT1	0.32722	0.48986	0.23203	0.0073428	1.3733	0.031369		55690	PACS1	0.0151	0.251011
100129476	100129476	-0.18751	-0.20734	0.13465	0.017872	-1.3628	0.031369		5230	PGK1	0.0287	-0.302876
79671	NLRX1	0.22236	0.2661	0.19565	0.01037	1.3662	0.031812		5198	PFAS	0.00262	-0.379139
9513	FXR2	0.15667	0.16397	0.19005	0.010952	1.365	0.031845		440354	LOC440354	0.00797	-0.401227
9782	MATR3	-0.3814	-0.21617	0.0085722	0.033958	-1.6666	0.032105		10630	PDPN	0.024	-0.394207
80230	RUFY1	0.26572	0.24861	0.098676	0.026085	1.3559	0.032105		5818	PVRL1	0.000158	0.553572
6936	GCFC2	-0.20569	-0.20994	0.11728	0.021957	-1.3545	0.032295		10605	PAIP1	0.00248	-0.396221
55872	PBK	0.4424	0.59869	0.16451	0.014325	1.3585	0.032295		51247	PAIP2	0.0163	-0.382878
286367	286367	-0.35472	-0.22107	0.051502	0.04542	-1.3543	0.032295		57060	PCBP4	0.000125	0.541348
80153	EDC3	0.25176	0.27425	0.10103	0.026186	1.3519	0.032626		5311	PKD2	7.25e-07	0.847048
4638	MYLK	0.52137	0.33486	0.016857	0.058814	1.4559	0.03263		22827	PUF60	0.00016	0.409054
22974	TPX2	0.41481	0.4729	0.086975	0.03039	1.3507	0.03263		54896	PQLC2	0.00277	-0.328379
10162	LPCAT3	0.15675	0.17704	0.14344	0.0177	1.3531	0.032693		10135	PBEF1	0.00425	-0.748854
7267	TTC3	-0.56119	-0.36998	0.018701	0.06382	-1.4228	0.032716		23627	PRND	0.0143	-0.254563
56257	MEPCE	0.68928	0.44012	0.0031701	0.012098	2.0325	0.032716		29023	PRO1880	0.0218	0.208767
64805	P2RY12	0.82552	1.4112	0.11563	0.00054926	1.8082	0.032716		22984	PDCD11	0.0136	0.296463
26224	FBXL3	-0.38983	-0.40197	0.04228	0.053752	-1.3509	0.032725		5542	PRB1	4.85e-06	0.708696
1798	DPAGT1	0.23448	0.26828	0.22656	0.0038294	1.4517	0.032954		5371	PML	5.2e-05	0.594803
2803	GOLGA4	-0.36194	-0.55231	0.17551	0.0017158	-1.5963	0.032966		10728	PTGES3	9.23e-05	-0.479715
83605	CCM2	0.26397	0.20531	0.032103	0.064153	1.3498	0.033238		5738	PTGFRN	0.0102	0.240918
2101	ESRRA	0.15822	0.19161	0.17613	0.013798	1.3507	0.033238		51371	POMP	0.0331	-0.236749
103	ADAR	0.44471	0.3048	0.024441	0.074704	1.3519	0.03344		3275	PRMT2	8.78e-05	0.45256
501	ALDH7A1	-0.11076	-0.17614	0.16492	0.015556	-1.347	0.0336		54496	PRMT7	3.73e-05	0.480684
56940	DUSP22	0.23352	0.18125	0.079663	0.034527	1.3422	0.0336		400986	LOC400986	0.00355	-0.767945
9277	WDR46	0.16167	0.2107	0.24585	0.0076975	1.3554	0.033647		56141	PCDHA7	0.0189	0.259422
7739	ZNF185	0.89654	0.49932	0.0063912	0.026661	1.7638	0.033993		11137	PWP1	0.00325	-0.378549
10158	PDZK1IP1	1.1009	0.71113	0.041106	0.057599	1.3415	0.034273		170394	PWWP2B	0.0463	0.217413
115353	LRRC42	-0.18483	-0.1699	0.11266	0.025646	-1.3379	0.034551		55066	PDPR	0.000351	0.501775
100874253	LINC00853	0.76727	0.48762	0.028187	0.072304	1.3417	0.035039		9910	RABGAP1L	7.91e-05	0.573355
2529	FUT7	0.28638	0.24512	0.11612	0.02571	1.3327	0.03557		5884	RAD17	0.0476	-0.194081
92822	ZNF276	0.27182	0.30853	0.10151	0.029523	1.3323	0.03557		5883	RAD9A	0.00341	0.313201
65990	ANTKMT	0.23077	0.17257	0.068538	0.041416	1.3321	0.03557		55698	RADIL	2.58e-06	0.895901
256021	LINC01619	-0.47172	-0.59864	0.10239	0.029433	-1.3312	0.035725		6095	RORA	0.00262	-0.717167
9987	HNRNPDL	-0.34393	-0.16462	0.025115	0.078462	-1.3383	0.035788		5978	REST	0.000197	0.448415
2630	GBAP1	0.2336	0.3687	0.19239	0.01336	1.3368	0.035788		3516	RBPJ	0.0017	-0.450262
51538	ZCCHC17	0.27511	0.17547	0.080809	0.037023	1.3291	0.035914		5925	RB1	0.000109	0.701294
4802	NFYC	0.35211	0.23445	0.011311	0.044769	1.5718	0.036037		11102	RPP14	0.00682	-0.213948
118881	COMTD1	0.12918	0.13767	0.13978	0.021438	1.3301	0.036037		6134	RPL10	8.76e-05	0.420701
10159	ATP6AP2	-0.30568	-0.18349	0.027719	0.075927	-1.3337	0.03633		6139	RPL17	0.0331	0.334189
120066	OR5P3	-0.15874	-0.22137	0.22918	0.010202	-1.3352	0.036519		6161	RPL32	0.0353	0.445344
55363	HEMGN	0.75986	1.0966	0.24218	0.009164	1.3367	0.036519		207032	dJ507I15.1	0.0386	0.320085
147495	APCDD1	0.44863	0.67061	0.25076	0.008571	1.3378	0.036519		6129	RPL7	0.00215	-0.421218
57407	NMRAL1	0.20638	0.25296	0.17764	0.01597	1.3294	0.036527		6227	RPS21	0.0259	0.422259
9147	NEMF	-0.21835	-0.19262	0.027306	0.077915	-1.3305	0.036824		11236	RNF139	0.0305	-0.312064
10257	ABCC4	0.5861	0.3292	0.03081	0.073446	1.3279	0.036947		54546	RNF186	0.000307	0.333083
8874	ARHGEF7	-0.19927	-0.19476	0.094193	0.033703	-1.322	0.036947		55072	RNF31	3.42e-06	0.690729
10112	KIF20A	0.38379	0.27951	0.032103	0.072265	1.3265	0.037121		80352	RNF39	3.47e-05	0.70997
79159	NOL12	0.27655	0.14769	0.015961	0.058923	1.4672	0.037233		9616	RNF7	0.007	-0.328495
800	CALD1	0.35314	0.25508	0.070447	0.043363	1.3195	0.037233		8780	RIOK3	0.00227	-0.432932
114884	OSBPL10	-0.15753	-0.31099	0.27702	0.0073273	-1.3352	0.037233		8241	RBM10	0.0175	0.32522
100132884	100132884	0.28683	0.46635	0.25699	0.0085698	1.332	0.03732		84991	RBM17	0.00184	-0.371223
10447	FAM3C	-0.4482	-0.56221	0.21271	0.012502	-1.3254	0.037534		55147	RBM23	0.0147	0.219406
29984	RHOD	-0.13213	-0.19963	0.20836	0.012932	-1.3249	0.037534		9584	RBM39	0.000715	-0.605179
5627	PROS1	1.1986	0.90232	0.048004	0.058761	1.3164	0.038227		23623	RUSC1	2.03e-05	0.510576
55718	POLR3E	-0.25612	-0.1858	0.086322	0.03836	-1.3141	0.038227		6281	S100A10	0.0109	0.26465
3045	HBD	1.4266	0.76819	0.090683	0.036701	1.3137	0.038255		6284	S100A13	0.00478	0.549691
8295	TRRAP	0.36515	0.4623	0.27134	0.0082568	1.3255	0.038813		23256	SCFD1	1.34e-05	-0.575369
51012	PRELID3B	-0.35152	-0.27816	0.15351	0.021475	-1.3138	0.038813		9919	SEC16A	0.0143	0.18093
79993	ELOVL7	1.388	0.97691	0.0067409	0.029703	1.7378	0.039019		11231	SEC63	0.00613	-0.328927
2983	GUCY1B1	0.7371	0.74385	0.087117	0.039085	1.3094	0.039019		10067	SCAMP3	1.53e-05	0.456234
57805	CCAR2	0.23711	0.28213	0.15326	0.021689	1.3126	0.039019		23544	SEZ6L	0.0133	0.211718
55788	LMBRD1	-0.36938	-0.3365	0.060642	0.051699	-1.31	0.039019		6404	SELPLG	0.00922	-0.212558
51562	MBIP	-0.40034	-0.22167	0.034517	0.074033	-1.3133	0.039129		10801	SEPTIN9	0.043	0.268015
8562	DENR	-0.30726	-0.13482	0.026859	0.084611	-1.3158	0.039129		10955	SERINC3	0.00247	-0.411413
3953	LEPR	0.22494	0.24399	0.13982	0.024726	1.3095	0.039129		6793	STK10	1.75e-05	0.585299
8241	RBM10	0.22744	0.27232	0.13308	0.026485	1.307	0.039622		8576	STK16	0.0425	0.260787
2091	FBL	-0.33108	-0.30093	0.080724	0.042702	-1.3045	0.039906		26135	SERBP1	0.000752	-0.440576
1241	LTB4R	0.45047	0.24188	0.033952	0.07612	1.3096	0.039943		6722	SRF	0.000655	0.370441
5724	PTAFR	0.69495	0.9428	0.014404	5.69e-06	2.9055	0.039984		6301	SARS	0.0405	0.345765
26086	GPSM1	-0.10569	-0.16431	0.19574	0.016076	-1.3092	0.039984		6733	SRPK2	0.0343	-0.263949
11024	LILRA1	0.51561	0.48229	0.063122	0.05184	1.3038	0.039984		10019	SH2B3	0.000912	0.456064
11013	TMSB15A	0.55831	0.34985	0.04175	0.069848	1.3021	0.041278		6450	SH3BGR	0.0129	-0.199676
84164	ASCC2	0.71789	0.2533	0.011077	0.045969	1.5748	0.041443		83442	SH3BGRL3	0.0468	0.273986
1627	DBN1	0.36632	0.26719	0.043423	0.068516	1.3003	0.041516		54549	SDK2	0.00397	0.346598
147179	WIPF2	0.2807	0.35519	0.037531	3.24e-05	2.4052	0.041836		84888	SPPL2A	0.011	-0.307868
79751	SLC25A22	0.22929	0.15009	0.020519	0.0734	1.3871	0.041942		6726	SRP9	0.0045	-0.478395
2888	GRB14	1.6997	1.0326	0.0047243	0.020903	1.8721	0.042021		284422	LOC284422	1.68e-06	0.86978
10274	STAG1	-0.19173	-0.18994	0.086871	0.042714	-1.2939	0.042084		23583	SMUG1	0.023	-0.303175
65993	MRPS34	0.39866	0.14227	0.019281	0.070611	1.4048	0.042092		6495	SIX1	0.00067	0.478723
10201	NME6	0.31343	0.39184	0.11977	0.032007	1.2932	0.042266		8293	SERF1A	3.42e-06	0.640834
5476	CTSA	1.2463	0.62249	0.0027429	0.011731	2.0754	0.042721		9905	SGSM2	0.0024	-0.329715
57616	TSHZ3	0.30164	0.40119	0.256	0.004919	1.3955	0.042721		6627	SNRPA1	2.62e-07	-0.721539
9804	TOMM20	-0.24756	-0.27733	0.16021	0.024096	-1.2903	0.043404		57228	LOC57228	0.011	-0.364788
2026	ENO2	0.65339	0.40254	0.050266	0.065172	1.2899	0.043404		7341	SUMO1	0.0424	-0.286612
124936	CYB5D2	0.3482	0.23212	0.061237	0.057612	1.289	0.043404		6615	SNAI1	3.47e-07	1.0403
131096	KCNH8	-0.54625	-0.88188	0.27512	0.010002	-1.2991	0.043671		10847	SRCAP	0.0412	0.222411
9737	GPRASP1	-0.67687	-0.59895	0.04574	0.070722	-1.2878	0.044011		6751	SSTR1	0.00398	-0.234023
8620	NPFF	0.26251	0.22097	0.15332	0.025895	1.2868	0.044011		9784	SNX17	0.0268	-0.29595
23228	PLCL2	-0.17122	-0.19997	0.14074	0.028547	-1.2857	0.044011		27131	SNX5	0.00117	-0.402776
7690	ZNF131	-0.31621	-0.18767	0.035548	0.082223	-1.2891	0.044073		6672	SP100	0.0109	-0.317134
22866	CNKSR2	-0.25195	-0.25155	0.079902	0.048228	-1.2837	0.044073		80208	SPG11	0.0261	-0.249545
5352	PLOD2	0.85883	0.59787	0.055436	0.062784	1.2851	0.044073		6687	SPG7	0.000234	0.429973
79612	NAA16	-0.34203	-0.25226	0.0030338	0.01365	-2.0293	0.045028		6723	SRM	0.00199	-0.390427
283238	SLC22A24	-0.16674	-0.22031	0.16081	0.025404	-1.2815	0.045028		6303	SAT1	0.0183	-0.490161
672	BRCA1	0.1283	0.15814	0.2062	0.01768	1.2856	0.045028		9580	SOX13	0.00158	-0.216557
23585	TMEM50A	0.22364	0.21082	0.16581	0.024581	1.2818	0.045028		83595	SOX7	0.0172	0.227129
83700	JAM3	0.35067	0.37642	0.068361	0.05589	1.2788	0.045336		55095	SAMD4B	1.97e-06	0.795965
7054	TH	-0.16884	-0.23542	0.21924	0.016432	-1.2838	0.045525		85439	STON2	0.00172	0.287753
57794	SUGP1	0.17317	0.13226	0.14029	0.030383	1.2764	0.046077		6388	SDF2	0.00217	-0.359582
84707	BEX2	-0.42984	-0.70568	0.19574	0.019908	-1.2794	0.046133		10923	SUB1	0.00121	-0.436267
91548	LOC91548	0.16707	0.17874	0.1553	0.027324	1.2763	0.046153		51684	SUFU	2.62e-07	0.834018
5980	REV3L	-0.35973	-0.54239	0.026441	1.45e-05	-2.5994	0.046242		9145	SYNGR1	5.81e-06	0.781656
9886	RHOBTB1	1.4888	1.0368	0.0055674	0.026075	1.8043	0.046242		23546	SYNGR4	0.0144	-0.292654
7263	TST	0.50398	0.27175	0.037263	0.084585	1.2779	0.046518		6386	SDCBP	0.00057	-0.848359
667	DST	-0.12717	-0.20712	0.27549	0.0058915	-1.3591	0.046908		9751	SNPH	0.00561	-0.340387
11237	RNF24	0.72752	0.29077	0.033383	0.090773	1.2759	0.047223		53407	STX18	3.92e-06	0.689037
10419	PRMT5	0.20196	0.25709	0.26819	0.0053332	1.3758	0.047223		9482	STX8	0.0462	0.258384
152579	SCFD2	0.23824	0.38258	0.31035	0.0089725	1.2848	0.047223		8887	TAX1BP1	0.00699	-0.432029
79156	PLEKHF1	0.28296	0.43352	0.091824	0.047197	1.2681	0.04754		9496	TBX4	0.000369	0.806187
5981	RFC1	-0.18387	-0.12486	0.044911	0.077851	-1.2705	0.047557		6910	TBX5	0.000502	-0.284363
23603	CORO1C	0.4982	0.30008	0.02407	0.085827	1.3334	0.047557		9519	TBPL1	3.81e-05	-0.394623
125115	KRT40	-0.14884	-0.12273	0.10183	0.043383	-1.2676	0.047557		10420	TESK2	0.00732	0.416676
2260	FGFR1	-0.133	-0.16835	0.1943	0.021351	-1.2711	0.047557		9984	THOC1	0.000606	-0.533984
4790	NFKB1	0.32637	0.25039	0.053691	0.069998	1.2686	0.04763		25917	THUMPD3	0.0193	-0.328578
113730	KLHDC7B	0.52947	0.43421	0.040882	0.084149	1.2677	0.048257		9320	TRIP12	0.000562	-0.387768
3927	LASP1	0.25058	0.41468	0.14036	0.00067979	1.7439	0.048257		7205	TRIP6	0.000478	-0.266703
890	CCNA2	0.264	0.45938	0.29318	0.010672	1.2769	0.048257		7073	TIAL1	0.003	-0.355863
220134	SKA1	0.23568	0.2193	0.097628	0.045936	1.2636	0.048257		7273	TTN	0.00262	0.328098
64397	ZNF106	0.26625	0.43117	0.26977	0.0053314	1.3745	0.048257		8940	TOP3B	0.0141	0.221497
3683	ITGAL	0.34024	0.26638	0.069461	0.059662	1.2641	0.048257		11257	TP53AP1	0.0173	0.285139
10735	STAG2	-0.28133	-0.22199	0.082216	0.053159	-1.2628	0.048257		10440	TIMM17A	5.31e-05	-0.495142
51237	MZB1	1.0182	0.67994	0.069214	0.060422	1.2626	0.048434		79089	TMUB2	0.0468	0.154224
7272	TTK	0.35053	0.39192	0.15224	0.03071	1.2615	0.048925		50999	TMED5	0.033	-0.285489
26469	PTPN18	0.42977	0.43029	0.10734	0.043655	1.259	0.049253		84336	TMEM101	0.033	-0.200974
5976	UPF1	0.31895	0.173	0.032734	0.096605	1.2653	0.049314		55654	TMEM127	0.0363	-0.194911
151195	CCNYL1	-0.33944	-0.1795	0.01854	0.071673	-1.4131	0.049314		54972	TMEM132A	1.24e-05	0.641486
55165	CEP55	0.41185	0.79276	0.24749	0.0039414	1.4258	0.049361		80775	TMEM177	0.0135	-0.268711
10099	TSPAN3	-0.19635	-0.15633	0.1029	0.045511	-1.2573	0.049428		55287	TMEM40	0.00222	0.337666
3134	HLA-F	0.17852	0.17013	0.1354	0.035913	1.2563	0.049916		440026	TMEM41B	0.00919	-0.389655
									81671	TMEM49	0.0178	-0.469512
									51669	TMEM66	0.000117	-0.619835
									51234	TMEM85	0.000121	-0.51779
									57761	TRIB3	0.00175	0.344459
									84675	TRIM55	3.31e-05	0.708433
									55128	TRIM68	0.000586	-0.504645
									81786	TRIM7	1.44e-05	0.720718
									56165	TDRD1	0.000875	0.596517
									11334	TUSC2	0.0417	0.337441
									7307	U2AF1	6.25e-05	-0.60886
									7316	UBC	0.0354	0.333548
									10537	UBD	0.0346	-0.195472
									29761	USP25	9.93e-05	-0.41371
									9960	USP3	0.011	-0.354347
									25862	USP49	9.78e-06	0.698286
									51569	UFM1	0.00562	-0.18913
									8409	UXT	0.0194	0.402825
									25972	UNC50	0.023	-0.271695
									7374	UNG	0.0116	0.275186
									90226	UCN2	2.26e-05	0.456672
									10911	UTS2	1.75e-05	0.710804
									51699	VPS29	0.0287	-0.277088
									1462	VCAN	0.00182	-0.730735
									9341	VAMP3	0.0148	-0.234938
									3815	KIT	0.000455	-0.278969
									7417	VDAC2	0.00905	-0.322136
									7419	VDAC3	0.0462	-0.253932
									317702	VN1R3	0.0248	0.356115
									10885	WDR3	2.26e-06	0.850987
									57539	WDR35	0.0178	0.290594
									51729	WBP11	0.0398	-0.270048
									51087	YBX2	0.000267	-0.730441
									10730	YME1L1	1.37e-05	-0.534783
									55854	ZC3H15	0.0026	-0.464207
									94039	ZNF101	0.00799	-0.345968
									7707	ZNF148	0.0167	-0.356969
									90338	ZNF160	0.00388	0.490999
									7572	ZNF24	8.57e-05	-0.396714
									11179	ZNF277	0.00222	-0.40695
									23528	ZNF281	0.000467	-0.500234
									55893	ZNF395	1.76e-06	0.883096
									147807	ZNF524	0.0232	0.195063
									23361	ZNF629	0.00052	0.345559
									51193	ZNF639	0.0228	-0.351999
									9726	ZNF646	3.14e-06	0.699776
									7637	ZNF84	7.3e-06	0.808426

## Sheet: Table S6
Table S6. The blood-specific protein interaction networks of differential expression gene from each comparison
Pathway	Total	Expected	Hits	P.Value	FDR
HCC vs. Control
Viral carcinogenesis	201	42.6	126	4.46e-38	1.42e-35
Cell cycle	124	26.3	90	5.44e-35	8.66e-33
Pathways in cancer	530	112	229	1.68e-32	1.79e-30
Hepatitis B	163	34.6	101	4.87e-30	3.87e-28
Kaposi's sarcoma-associated herpesvirus infection	186	39.4	106	4.09e-27	2.6e-25
Ubiquitin mediated proteolysis	137	29	85	1.73e-25	9.19e-24
Measles	138	29.3	84	2.22e-24	1.01e-22
HTLV-I infection	219	46.4	112	3.06e-23	1.11e-21
Neurotrophin signaling pathway	119	25.2	75	3.14e-23	1.11e-21
TNF signaling pathway	110	23.3	71	5.95e-23	1.89e-21
Epstein-Barr virus infection	201	42.6	104	3.74e-22	1.08e-20
Hepatitis C	155	32.9	87	8.15e-22	2.16e-20
Pancreatic cancer	75	15.9	54	3.74e-21	9.14e-20
Chronic myeloid leukemia	76	16.1	54	1.03e-20	2.34e-19
Proteoglycans in cancer	201	42.6	100	1e-19	2.12e-18
Cellular senescence	160	33.9	85	2.96e-19	5.88e-18
Apoptosis	136	28.8	76	4.78e-19	8.94e-18
Prostate cancer	97	20.6	60	3.07e-18	5.42e-17
Transcriptional misregulation in cancer	186	39.4	92	5.09e-18	8.51e-17
FoxO signaling pathway	132	28	73	5.36e-18	8.52e-17
Small cell lung cancer	93	19.7	58	6.44e-18	9.75e-17
Tight junction	170	36	86	1.06e-17	1.54e-16
NF-kappa B signaling pathway	100	21.2	60	2.55e-17	3.52e-16
T cell receptor signaling pathway	101	21.4	60	5e-17	6.62e-16
Thyroid hormone signaling pathway	116	24.6	65	1.51e-16	1.92e-15
Non-small cell lung cancer	66	14	45	2.27e-16	2.77e-15
Regulation of actin cytoskeleton	214	45.4	98	3.06e-16	3.61e-15
Adherens junction	72	15.3	47	6.74e-16	7.45e-15
PI3K-Akt signaling pathway	354	75	140	6.8e-16	7.45e-15
Osteoclast differentiation	128	27.1	68	1.21e-15	1.28e-14
Colorectal cancer	86	18.2	52	2.22e-15	2.28e-14
Pathogenic Escherichia coli infection	55	11.7	39	2.94e-15	2.78e-14
Renal cell carcinoma	69	14.6	45	2.97e-15	2.78e-14
Toxoplasmosis	113	24	62	2.97e-15	2.78e-14
Focal adhesion	199	42.2	91	4.09e-15	3.69e-14
Fluid shear stress and atherosclerosis	139	29.5	71	4.18e-15	3.69e-14
Glioma	75	15.9	47	7.04e-15	6.05e-14
AGE-RAGE signaling pathway in diabetic complications	100	21.2	56	2.03e-14	1.7e-13
MAPK signaling pathway	295	62.5	119	2.22e-14	1.81e-13
Influenza A	167	35.4	79	2.84e-14	2.26e-13
ErbB signaling pathway	85	18	50	3.64e-14	2.82e-13
Shigellosis	65	13.8	42	4.11e-14	3.11e-13
Alcoholism	180	38.2	82	1.26e-13	9.33e-13
Endocrine resistance	98	20.8	54	1.48e-13	1.07e-12
Estrogen signaling pathway	138	29.3	68	1.56e-13	1.1e-12
NOD-like receptor signaling pathway	178	37.7	81	1.92e-13	1.33e-12
Fc gamma R-mediated phagocytosis	91	19.3	51	2.89e-13	1.96e-12
Insulin resistance	108	22.9	57	3.67e-13	2.42e-12
Insulin signaling pathway	137	29	67	3.73e-13	2.42e-12
B cell receptor signaling pathway	71	15	43	5.59e-13	3.56e-12
Toll-like receptor signaling pathway	104	22	55	8.56e-13	5.34e-12
HIF-1 signaling pathway	100	21.2	53	2e-12	1.22e-11
Chagas disease (American trypanosomiasis)	103	21.8	54	2.19e-12	1.31e-11
Acute myeloid leukemia	66	14	40	3.53e-12	2.08e-11
Bacterial invasion of epithelial cells	74	15.7	43	4.09e-12	2.36e-11
Ras signaling pathway	232	49.2	94	9.96e-12	5.66e-11
Rap1 signaling pathway	206	43.7	86	1.18e-11	6.59e-11
Endometrial cancer	58	12.3	36	1.59e-11	8.71e-11
EGFR tyrosine kinase inhibitor resistance	79	16.7	44	1.68e-11	9.03e-11
Necroptosis	162	34.3	72	1.74e-11	9.23e-11
Chemokine signaling pathway	190	40.3	80	3.75e-11	1.96e-10
Endocytosis	244	51.7	96	4.36e-11	2.24e-10
Platinum drug resistance	73	15.5	41	5.78e-11	2.92e-10
Hippo signaling pathway	154	32.6	68	9.15e-11	4.55e-10
Bladder cancer	41	8.69	28	1.07e-10	5.25e-10
Protein processing in endoplasmic reticulum	165	35	71	1.48e-10	7.15e-10
p53 signaling pathway	72	15.3	40	1.56e-10	7.42e-10
Tuberculosis	179	37.9	75	2.05e-10	9.58e-10
Oocyte meiosis	125	26.5	58	2.1e-10	9.66e-10
Sphingolipid signaling pathway	119	25.2	56	2.19e-10	9.96e-10
Prolactin signaling pathway	70	14.8	39	2.37e-10	1.06e-09
Pertussis	76	16.1	41	3.15e-10	1.39e-09
Adipocytokine signaling pathway	69	14.6	38	6.35e-10	2.77e-09
Melanoma	72	15.3	39	7.29e-10	3.13e-09
Progesterone-mediated oocyte maturation	99	21	48	1.22e-09	5.19e-09
Mitophagy - animal	65	13.8	36	1.46e-09	6.1e-09
Platelet activation	124	26.3	56	1.52e-09	6.3e-09
Fc epsilon RI signaling pathway	68	14.4	37	1.68e-09	6.87e-09
Apelin signaling pathway	137	29	60	1.75e-09	7.03e-09
Spliceosome	134	28.4	59	1.86e-09	7.39e-09
Dopaminergic synapse	131	27.8	58	1.97e-09	7.75e-09
Th17 cell differentiation	107	22.7	50	2.76e-09	1.07e-08
AMPK signaling pathway	120	25.4	54	3.51e-09	1.34e-08
RIG-I-like receptor signaling pathway	70	14.8	37	4.91e-09	1.86e-08
Legionellosis	55	11.7	31	1.15e-08	4.31e-08
Leukocyte transendothelial migration	112	23.7	50	1.84e-08	6.82e-08
Apoptosis - multiple species	33	6.99	22	2.23e-08	8.16e-08
Breast cancer	147	31.2	60	4.29e-08	1.55e-07
IL-17 signaling pathway	93	19.7	43	5.25e-08	1.88e-07
Gap junction	88	18.7	41	8.21e-08	2.9e-07
Central carbon metabolism in cancer	65	13.8	33	1.19e-07	4.17e-07
Longevity regulating pathway	89	18.9	41	1.21e-07	4.2e-07
Leishmaniasis	74	15.7	36	1.3e-07	4.44e-07
Autophagy - animal	128	27.1	53	1.51e-07	5.11e-07
VEGF signaling pathway	59	12.5	30	4.29e-07	1.44e-06
GnRH signaling pathway	93	19.7	41	5.31e-07	1.76e-06
Glucagon signaling pathway	103	21.8	44	6.06e-07	1.99e-06
Salmonella infection	86	18.2	38	1.29e-06	4.17e-06
Epithelial cell signaling in Helicobacter pylori infection	68	14.4	32	1.64e-06	5.28e-06
Longevity regulating pathway - multiple species	62	13.1	29	5.85e-06	1.86e-05
Circadian rhythm	31	6.57	18	8.08e-06	2.54e-05
Cholinergic synapse	112	23.7	44	8.87e-06	2.76e-05
Choline metabolism in cancer	99	21	39	2.63e-05	8.12e-05
Oxytocin signaling pathway	153	32.4	54	3.5e-05	0.000107
Mismatch repair	23	4.88	14	4.07e-05	0.000123
mRNA surveillance pathway	91	19.3	36	4.78e-05	0.000143
Adrenergic signaling in cardiomyocytes	145	30.7	51	6.34e-05	0.000188
Homologous recombination	41	8.69	20	7.82e-05	0.00023
Signaling pathways regulating pluripotency of stem cells	139	29.5	49	8.22e-05	0.00024
cAMP signaling pathway	212	44.9	68	0.000119	0.000345
Natural killer cell mediated cytotoxicity	131	27.8	46	0.000149	0.000427
Type II diabetes mellitus	46	9.75	21	0.000173	0.000492
Thyroid cancer	37	7.84	18	0.000186	0.000523
Circadian entrainment	97	20.6	36	0.000222	0.000619
Non-homologous end-joining	13	2.76	9	0.000262	0.000725
Long-term potentiation	67	14.2	27	0.000288	0.000789
TGF-beta signaling pathway	92	19.5	34	0.00036	0.00097
Th1 and Th2 cell differentiation	92	19.5	34	0.00036	0.00097
Wnt signaling pathway	158	33.5	52	0.000366	0.000978
Amphetamine addiction	68	14.4	27	0.000382	0.00101
HCC vs. LC
Viral carcinogenesis	201	15.6	72	1.14e-30	3.63e-28
Ubiquitin mediated proteolysis	137	10.6	49	4.62e-21	7.35e-19
Pathways in cancer	530	41.2	101	1.77e-18	1.87e-16
Hepatitis B	163	12.7	50	3.53e-18	2.81e-16
Epstein-Barr virus infection	201	15.6	55	2.22e-17	1.41e-15
Cell cycle	124	9.63	39	7.95e-15	4.21e-13
HTLV-I infection	219	17	53	2.47e-14	1.12e-12
Hepatitis C	155	12	42	2.29e-13	9.1e-12
Kaposi's sarcoma-associated herpesvirus infection	186	14.4	45	2.49e-12	8.79e-11
Pancreatic cancer	75	5.83	26	2.22e-11	7.07e-10
Chronic myeloid leukemia	76	5.9	26	3.13e-11	9.06e-10
Adherens junction	72	5.59	25	5.21e-11	1.38e-09
Transcriptional misregulation in cancer	186	14.4	42	1.47e-10	3.6e-09
Neurotrophin signaling pathway	119	9.24	32	2.2e-10	4.99e-09
Prostate cancer	97	7.53	28	5.07e-10	1.07e-08
Bacterial invasion of epithelial cells	74	5.75	24	6.41e-10	1.27e-08
NF-kappa B signaling pathway	100	7.77	28	1.1e-09	2.05e-08
Shigellosis	65	5.05	22	1.33e-09	2.36e-08
Endocrine resistance	98	7.61	27	3.24e-09	5.42e-08
Small cell lung cancer	93	7.22	26	4.52e-09	7.19e-08
NOD-like receptor signaling pathway	178	13.8	38	6.08e-09	9.21e-08
Proteoglycans in cancer	201	15.6	40	2e-08	2.89e-07
Cellular senescence	160	12.4	34	4.41e-08	6.03e-07
Measles	138	10.7	31	4.55e-08	6.03e-07
TNF signaling pathway	110	8.54	27	4.81e-08	6.11e-07
FoxO signaling pathway	132	10.3	30	5.69e-08	6.96e-07
Acute myeloid leukemia	66	5.13	20	6.36e-08	7.22e-07
Non-small cell lung cancer	66	5.13	20	6.36e-08	7.22e-07
ErbB signaling pathway	85	6.6	23	6.93e-08	7.6e-07
Colorectal cancer	86	6.68	23	8.79e-08	9.31e-07
Renal cell carcinoma	69	5.36	20	1.45e-07	1.48e-06
Thyroid hormone signaling pathway	116	9.01	27	1.57e-07	1.56e-06
Endometrial cancer	58	4.51	18	1.94e-07	1.87e-06
Spliceosome	134	10.4	29	2.91e-07	2.72e-06
EGFR tyrosine kinase inhibitor resistance	79	6.14	21	3.59e-07	3.26e-06
PI3K-Akt signaling pathway	354	27.5	55	3.76e-07	3.33e-06
Platinum drug resistance	73	5.67	20	4e-07	3.4e-06
Apoptosis	136	10.6	29	4.06e-07	3.4e-06
HIF-1 signaling pathway	100	7.77	24	4.21e-07	3.44e-06
Focal adhesion	199	15.5	36	1.2e-06	9.53e-06
Mitophagy - animal	65	5.05	18	1.28e-06	9.96e-06
IL-17 signaling pathway	93	7.22	22	1.66e-06	1.26e-05
Fluid shear stress and atherosclerosis	139	10.8	28	2.15e-06	1.59e-05
Breast cancer	147	11.4	29	2.21e-06	1.6e-05
Pathogenic Escherichia coli infection	55	4.27	16	2.45e-06	1.73e-05
Prolactin signaling pathway	70	5.44	18	4.14e-06	2.86e-05
Th17 cell differentiation	107	8.31	23	5.6e-06	3.79e-05
Chemokine signaling pathway	190	14.8	33	8.33e-06	5.52e-05
Circadian rhythm	31	2.41	11	1.14e-05	7.39e-05
Glioma	75	5.83	18	1.18e-05	7.5e-05
Toxoplasmosis	113	8.78	23	1.46e-05	9.08e-05
Necroptosis	162	12.6	29	1.62e-05	9.93e-05
MAPK signaling pathway	295	22.9	44	1.68e-05	0.000101
RIG-I-like receptor signaling pathway	70	5.44	17	1.74e-05	0.000103
Signaling pathways regulating pluripotency of stem cells	139	10.8	26	2e-05	0.000116
AGE-RAGE signaling pathway in diabetic complications	100	7.77	21	2.08e-05	0.000118
Insulin resistance	108	8.39	22	2.2e-05	0.000123
Oocyte meiosis	125	9.71	24	2.66e-05	0.000146
Influenza A	167	13	29	2.94e-05	0.000159
Autophagy - animal	128	9.94	24	3.99e-05	0.000208
Osteoclast differentiation	128	9.94	24	3.99e-05	0.000208
Bladder cancer	41	3.18	12	4.19e-05	0.000215
Insulin signaling pathway	137	10.6	25	4.45e-05	0.000224
Estrogen signaling pathway	138	10.7	25	5.04e-05	0.000251
Thyroid cancer	37	2.87	11	7.48e-05	0.000366
p53 signaling pathway	72	5.59	16	9.75e-05	0.000463
Melanoma	72	5.59	16	9.75e-05	0.000463
Tight junction	170	13.2	28	0.000106	0.000495
Tuberculosis	179	13.9	29	0.000108	0.000499
Hippo signaling pathway	154	12	26	0.000122	0.000556
Apoptosis - multiple species	33	2.56	10	0.000133	0.000596
Leishmaniasis	74	5.75	16	0.000138	0.000608
Hedgehog signaling pathway	47	3.65	12	0.00018	0.000785
TGF-beta signaling pathway	92	7.15	18	0.000208	0.000893
Longevity regulating pathway - multiple species	62	4.82	14	0.00022	0.000934
Notch signaling pathway	48	3.73	12	0.000224	0.000935
B cell receptor signaling pathway	71	5.52	15	0.00029	0.0012
Leukocyte transendothelial migration	112	8.7	20	0.000342	0.00139
Protein processing in endoplasmic reticulum	165	12.8	26	0.000381	0.00153
Longevity regulating pathway	89	6.91	17	0.000417	0.00166
Non-alcoholic fatty liver disease (NAFLD)	149	11.6	24	0.000456	0.00179
Endocytosis	244	19	34	0.000563	0.00218
Chagas disease (American trypanosomiasis)	103	8	18	0.000869	0.00333
RNA transport	165	12.8	25	0.000888	0.00336
Central carbon metabolism in cancer	65	5.05	13	0.00125	0.00467
Jak-STAT signaling pathway	162	12.6	24	0.00153	0.00566
Fc gamma R-mediated phagocytosis	91	7.07	16	0.00155	0.00566
Pertussis	76	5.9	14	0.00189	0.00684
Adipocytokine signaling pathway	69	5.36	13	0.0022	0.00788
Salmonella infection	86	6.68	15	0.00233	0.00816
Type II diabetes mellitus	46	3.57	10	0.00234	0.00816
Wnt signaling pathway	158	12.3	23	0.00241	0.00832
MicroRNAs in cancer	299	23.2	37	0.00296	0.0101
Ferroptosis	40	3.11	9	0.00298	0.0101
Homologous recombination	41	3.18	9	0.00356	0.0119
Progesterone-mediated oocyte maturation	99	7.69	16	0.00376	0.0125
Cocaine addiction	49	3.81	10	0.00381	0.0125
Prion diseases	35	2.72	8	0.00454	0.0147
Rap1 signaling pathway	206	16	27	0.00483	0.0155
VEGF signaling pathway	59	4.58	11	0.00512	0.0162
Amyotrophic lateral sclerosis (ALS)	51	3.96	10	0.00515	0.0162
Fc epsilon RI signaling pathway	68	5.28	12	0.0056	0.0175
Proteasome	45	3.5	9	0.00683	0.0211
Autophagy - other	32	2.49	7	0.01	0.0306
Sphingolipid signaling pathway	119	9.24	17	0.0101	0.0307
T cell receptor signaling pathway	101	7.85	15	0.0108	0.0324
GnRH signaling pathway	93	7.22	14	0.0121	0.0359
cAMP signaling pathway	212	16.5	26	0.013	0.0384
Toll-like receptor signaling pathway	104	8.08	15	0.014	0.0408
Regulation of actin cytoskeleton	214	16.6	26	0.0146	0.0422
Amphetamine addiction	68	5.28	11	0.0149	0.0427
Aldosterone-regulated sodium reabsorption	37	2.87	7	0.0219	0.062
Alcoholism	180	14	22	0.022	0.062
Basal cell carcinoma	63	4.89	10	0.0223	0.0623
Dopaminergic synapse	131	10.2	17	0.0246	0.068
Th1 and Th2 cell differentiation	92	7.15	13	0.0248	0.068
Antigen processing and presentation	77	5.98	11	0.0346	0.0942
Ras signaling pathway	232	18	26	0.0363	0.0978
Viral myocarditis	59	4.58	9	0.037	0.0988
Choline metabolism in cancer	99	7.69	13	0.042	0.111

## Sheet: Table S7
Table S7A. Pathway enrichment of gene-metabolite interaction network							Table S7B. Potential hub genes/metabolite in gene-metabolite interaction network
Pathway	Total	Expected	Hits	P.Value	FDR		KEGG ID/Entrez ID	Label	Degree	Betweenness
HCC vs. Control							HCC vs. Control
Arginine biosynthesis	27	0.365	8	8.4e-10	1.008e-08		C00116	Glycerol	19	1448.54
Aminoacyl-tRNA biosynthesis	74	1	11	1.06e-09	6.36e-09		C00025	L-Glutamic acid	10	821.09
Nitrogen metabolism	10	0.135	3	0.000254	0.001016		C00062	L-Arginine	9	513.76
Arginine and proline metabolism	78	1.05	6	0.000489	0.001467		384	ARG2	7	246.57
Histidine metabolism	32	0.433	4	0.000764	0.0018336		445	ASS1	6	990.21
Alanine, aspartate and glutamate metabolism	61	0.825	5	0.00115	0.0023		C00387	Guanosine	6	438.14
Phenylalanine metabolism	21	0.284	3	0.00254	0.00435429		C00077	Ornithine	6	119.97
D-Glutamine and D-glutamate metabolism	10	0.135	2	0.00746	0.01119		C00047	L-Lysine	5	16.2
Phenylalanine, tyrosine and tryptophan biosynthesis	11	0.149	2	0.00904	0.0120533		C00073	L-Methionine	4	298.86
beta-Alanine metabolism	44	0.595	3	0.0205	0.0246		501	ALDH7A1	3	478.31
Galactose metabolism	51	0.69	3	0.0302	0.0329455		7054	TH	3	209.64
Glyoxylate and dicarboxylate metabolism	56	0.757	3	0.0384	0.0384		760	CA2	3	174.08
HCC vs. LC							C00079	L-Phenylalanine	3	129.73
Aminoacyl-tRNA biosynthesis	74	1.03	10	2.6e-08	3.12e-07		10257	ABCC4	3	113.15
Glutathione metabolism	56	0.78	7	7.62e-06	4.572e-05		C00158	Citric acid	3	101.5
Arginine biosynthesis	27	0.376	5	2.51e-05	0.0001004		C00327	Citrulline	3	63.82
Glyoxylate and dicarboxylate metabolism	56	0.78	6	9.12e-05	0.0002736		1241	LTB4R	3	9.32
Alanine, aspartate and glutamate metabolism	61	0.85	6	0.000148	0.0003552		29933	GPR132	3	9.32
Arginine and proline metabolism	78	1.09	6	0.000579	0.001158		8620	NPFF	3	9.32
Purine metabolism	166	2.31	7	0.00667	0.0114343		5724	PTAFR	3	9.32
D-Glutamine and D-glutamate metabolism	10	0.139	2	0.00791	0.011865		3043	HBB	2	333.53
Nitrogen metabolism	10	0.139	2	0.00791	0.0105467		2157	F8	2	161
Phenylalanine, tyrosine and tryptophan biosynthesis	11	0.153	2	0.00958	0.011496		56952	PRTFDC1	2	146.47
Valine, leucine and isoleucine biosynthesis	12	0.167	2	0.0114	0.0124364		10201	NME6	2	134
Phenylalanine metabolism	21	0.293	2	0.0335	0.0335		4627	MYH9	2	128.19
							C00366	Uric acid	2	101.45
							3934	LCN2	2	96.5
							C01586	Hippuric acid	2	89.37
							3553	IL1B	2	68
							130589	GALM	2	68
							C00082	L-Tyrosine	2	68
							C00064	L-Glutamine	2	68
							890	CCNA2	2	34.56
							C00791	Creatinine	2	34
							C00049	L-Aspartic acid	2	17.57
							5816	PVALB	2	10.01
							5473	PPBP	2	3.5
							HCC vs. LC
							C00025	L-Glutamic acid	13	744.83
							C00116	Glycerol	13	625.2
							C00062	L-Arginine	10	532.08
							3939	LDHA	9	441.15
							9521	EEF1E1	7	658.37
							847	CAT	7	453.61
							C00077	Ornithine	7	70.5
							C00064	L-Glutamine	6	254.32
							C00049	L-Aspartic acid	4	176.3
							C00299	Uridine	4	132.69
							132	ADK	4	124.94
							C00262	Hypoxanthine	4	112.15
							C02477	Alpha-Tocopherol	4	62.98
							51056	LAP3	4	41.97
							7374	UNG	3	119.21
							C00366	Uric acid	3	90.95
							C00300	Creatine	3	83.35
							C00041	L-Alanine	3	79.29
							2950	GSTP1	3	72.36
							581	BAX	3	70.77
							3251	HPRT1	3	65.98
							43	ACHE	2	124
							C00079	L-Phenylalanine	2	63
							C00123	L-Leucine	2	54.39
							5198	PFAS	2	49.44
							79017	GGCT	2	44.72
							C00158	Citric acid	2	30.71
							301	ANXA1	2	19
							2829	XCR1	2	19
							4923	NTSR1	2	19
							624	BDKRB2	2	19
							8477	GPR65	2	19
							10911	UTS2	2	19
							5230	PGK1	2	18.48
							C05984	2-Hydroxybutyric acid	2	16.29
							C00037	Glycine	2	5.99

## Sheet: Table S8
Table S8. KEGG lipid-related gene networks result from lipid enrichment sub-class
Pathway	Lipid gene number	Pathway gene number	-log10(p-value)	Lipid gene symbol
HCC vs. Control
PI3K-Akt signaling pathway	4	157	11.98	FASLG,IKBKB,RAC1,TLR4
Pathways in cancer	9	156	8.2	CDC42,FASLG,IKBKB,MAPK10,MAPK8,MAPK9,PLD1,PLD2,RAC1
Rap1 signaling pathway	4	105	6.76	ADORA2A,ADORA2B,CDC42,RAC1
Ether lipid metabolism	37	47	5.8	CEPT1,CHPT1,ENPP6,GDPD1,GDPD3,JMJD7-PLA2G4B,LPCAT1,LPCAT2,LPCAT4,PAFAH1B1,PAFAH1B2,PAFAH1B3,PLA2G10,PLA2G12A,PLA2G12B,PLA2G1B,PLA2G2A,PLA2G2C,PLA2G2D,PLA2G2E,PLA2G2F,PLA2G3,PLA2G4A,PLA2G4B,PLA2G4C,PLA2G4D,PLA2G4E,PLA2G4F,PLA2G5,PLA2G6,PLAAT3,PLB1,PLD1,PLD2,PLD3,PLD4,SELENOI
Calcium signaling pathway	2	73	5.38	ADORA2A,ADORA2B						a
Chemokine signaling pathway	4	88	5.27	CDC42,FGR,IKBKB,RAC1
Human cytomegalovirus infection	4	82	4.72	FASLG,IKBKB,RAC1,TNF
alpha-Linolenic acid metabolism	21	21	4.56	JMJD7-PLA2G4B,PLA2G10,PLA2G12A,PLA2G12B,PLA2G1B,PLA2G2A,PLA2G2C,PLA2G2D,PLA2G2E,PLA2G2F,PLA2G3,PLA2G4A,PLA2G4B,PLA2G4C,PLA2G4D,PLA2G4E,PLA2G4F,PLA2G5,PLA2G6,PLAAT3,PLB1
Arachidonic acid metabolism	21	21	4.56	JMJD7-PLA2G4B,PLA2G10,PLA2G12A,PLA2G12B,PLA2G1B,PLA2G2A,PLA2G2C,PLA2G2D,PLA2G2E,PLA2G2F,PLA2G3,PLA2G4A,PLA2G4B,PLA2G4C,PLA2G4D,PLA2G4E,PLA2G4F,PLA2G5,PLA2G6,PLAAT3,PLB1
Linoleic acid metabolism	21	21	4.56	JMJD7-PLA2G4B,PLA2G10,PLA2G12A,PLA2G12B,PLA2G1B,PLA2G2A,PLA2G2C,PLA2G2D,PLA2G2E,PLA2G2F,PLA2G3,PLA2G4A,PLA2G4B,PLA2G4C,PLA2G4D,PLA2G4E,PLA2G4F,PLA2G5,PLA2G6,PLAAT3,PLB1
Cholesterol metabolism	25	29	4.56	APOA1,APOA2,APOA4,APOB,APOC1,APOC2,APOC3,APOE,CD36,CETP,LCAT,LDLR,LDLRAP1,LIPA,LIPC,LIPG,LPA,LPL,LRP1,LRP2,NCEH1,PLTP,SCARB1,SOAT1,SOAT2
Human papillomavirus infection	4	79	4.35	CDC42,FASLG,IKBKB,TNF
Glycerophospholipid metabolism	46	82	4.15	AGPAT3,CEPT1,CHPT1,JMJD7-PLA2G4B,LCAT,LPCAT1,LPCAT2,LPCAT3,LPCAT4,LYPLA1,LYPLA2,MBOAT1,MBOAT2,PEMT,PISD,PLA2G10,PLA2G12A,PLA2G12B,PLA2G15,PLA2G1B,PLA2G2A,PLA2G2C,PLA2G2D,PLA2G2E,PLA2G2F,PLA2G3,PLA2G4A,PLA2G4B,PLA2G4C,PLA2G4D,PLA2G4E,PLA2G4F,PLA2G5,PLA2G6,PLAAT3,PLB1,PLD1,PLD2,PLD3,PLD4,PNPLA6,PNPLA7,PTDSS1,PTDSS2,SELENOI,TAZ
Focal adhesion	5	82	4.13	CDC42,MAPK10,MAPK8,MAPK9,RAC1
Dopaminergic synapse	3	68	4.09	MAPK10,MAPK8,MAPK9
Regulation of actin cytoskeleton	10	109	3.76	ACTR2,ACTR3,ARPC1A,ARPC2,ARPC3,ARPC4,ARPC5,CDC42,RAC1,WASL
Relaxin signaling pathway	3	63	3.73	MAPK10,MAPK8,MAPK9
Phosphatidylinositol signaling system	5	72	3.28	OCRL,PIK3C2A,PIK3C3,SYNJ1,SYNJ2
Fat digestion and absorption	24	35	3.27	APOA1,APOA4,APOB,CD36,CEL,FABP1,FABP2,LIPF,MTTP,PLA2G10,PLA2G12A,PLA2G12B,PLA2G1B,PLA2G2A,PLA2G2C,PLA2G2D,PLA2G2E,PLA2G2F,PLA2G3,PLA2G5,PNLIP,PNLIPRP1,PNLIPRP2,SCARB1
Human immunodeficiency virus 1 infection	8	91	3.27	FASLG,IKBKB,MAPK10,MAPK8,MAPK9,RAC1,TLR4,TNF
Necroptosis	21	29	3.15	CHMP2A,CHMP2B,CHMP3,CHMP4A,CHMP4B,CHMP4C,CHMP6,CHMP7,FASLG,JMJD7-PLA2G4B,MAPK10,MAPK8,MAPK9,PLA2G4A,PLA2G4B,PLA2G4C,PLA2G4D,PLA2G4E,PLA2G4F,TLR4,TNF
mTOR signaling pathway	2	50	3.1	IKBKB,TNF
Neutrophil extracellular trap formation	2	50	3.1	RAC1,TLR4
ErbB signaling pathway	3	55	3.02	MAPK10,MAPK8,MAPK9
Axon guidance	2	47	2.93	CDC42,RAC1
PD-L1 expression and PD-1 checkpoint pathway in cancer	2	47	2.93	IKBKB,TLR4
B cell receptor signaling pathway	2	45	2.75	IKBKB,RAC1
Huntington disease	27	46	2.74	ACTR10,ACTR1A,AP2A1,AP2A2,AP2B1,AP2M1,AP2S1,BECN1,CLTA,CLTB,CLTC,CLTCL1,DCTN1,DCTN2,DCTN3,DCTN4,DCTN5,DCTN6,ERN1,HIP1,MAPK10,MAPK8,MAPK9,PIK3C3,PIK3R4,UCP1,WIPI2
Phospholipase D signaling pathway	13	111	2.71	AGPAT3,DNM1,DNM2,DNM3,JMJD7-PLA2G4B,PLA2G4A,PLA2G4B,PLA2G4C,PLA2G4D,PLA2G4E,PLA2G4F,PLD1,PLD2
Sphingolipid metabolism	2	43	2.57	SGMS1,SGMS2
Sphingolipid signaling pathway	9	87	2.54	MAPK10,MAPK8,MAPK9,PLD1,PLD2,RAC1,SGMS1,SGMS2,TNF
Endocytosis	49	111	2.49	ACTR2,ACTR3,AMPH,AP2A1,AP2A2,AP2B1,AP2M1,AP2S1,ARPC1A,ARPC2,ARPC3,ARPC4,ARPC5,BIN1,CAPZA1,CAPZA2,CAPZA3,CAPZB,CDC42,CHMP2A,CHMP2B,CHMP3,CHMP4A,CHMP4B,CHMP4C,CHMP6,CHMP7,CLTA,CLTB,CLTC,CLTCL1,DAB2,DNAJC6,DNM1,DNM2,DNM3,EPS15,HSPA8,LDLR,LDLRAP1,PLD1,PLD2,RAB5A,RAB5B,RAB5C,SH3GL1,SH3GL2,SH3GL3,WASL
Alcoholism	2	41	2.39	ADORA2A,ADORA2B
Inositol phosphate metabolism	5	59	2.31	OCRL,PIK3C2A,PIK3C3,SYNJ1,SYNJ2
Growth hormone synthesis, secretion and action	4	54	2.31	GHRL,MAPK10,MAPK8,MAPK9
PPAR signaling pathway	20	32	2.3	ACSBG1,ACSBG2,ACSL1,ACSL3,ACSL4,ACSL5,ACSL6,APOA1,APOA2,APOA5,APOC3,CD36,FABP1,FABP2,FABP4,LPL,OLR1,PLTP,PPARA,UCP1
MAPK signaling pathway	16	118	2.24	CDC42,FASLG,HSPA8,IKBKB,JMJD7-PLA2G4B,MAPK10,MAPK8,MAPK9,PLA2G4A,PLA2G4B,PLA2G4C,PLA2G4D,PLA2G4E,PLA2G4F,RAC1,TNF
AMPK signaling pathway	2	39	2.21	CD36,LIPE
Synaptic vesicle cycle	12	15	2.16	AP2A1,AP2A2,AP2B1,AP2M1,AP2S1,CLTA,CLTB,CLTC,CLTCL1,DNM1,DNM2,DNM3
Natural killer cell mediated cytotoxicity	4	51	2.15	FASLG,NCR2,RAC1,TNF
Vasopressin-regulated water reabsorption	15	22	2.15	DCTN1,DCTN2,DCTN4,DCTN5,DCTN6,DYNC1H1,DYNC1I1,DYNC1I2,DYNC1LI1,DYNC1LI2,DYNLL1,DYNLL2,RAB5A,RAB5B,RAB5C
Renal cell carcinoma	2	37	2.03	CDC42,RAC1
T cell receptor signaling pathway	6	61	2.03	CDC42,IKBKB,MAPK10,MAPK8,MAPK9,TNF
Leukocyte transendothelial migration	3	43	2	CDC42,PECAM1,RAC1
Platelet activation	7	65	1.92	JMJD7-PLA2G4B,PLA2G4A,PLA2G4B,PLA2G4C,PLA2G4D,PLA2G4E,PLA2G4F
Autophagy - other	14	22	1.88	ATG12,ATG16L1,ATG4A,ATG4B,ATG4C,ATG4D,ATG5,BECN1,GABARAP,GABARAPL1,GABARAPL2,PIK3C3,PIK3R4,WIPI2
Endocrine resistance	3	41	1.84	MAPK10,MAPK8,MAPK9
Neurotrophin signaling pathway	7	63	1.78	CDC42,FASLG,IKBKB,MAPK10,MAPK8,MAPK9,RAC1
Herpes simplex virus 1 infection	4	46	1.68	EIF2AK3,FASLG,IKBKB,TNF
Viral carcinogenesis	2	34	1.67	CDC42,RAC1
Ferroptosis	10	14	1.67	ACSL1,ACSL3,ACSL4,ACSL5,ACSL6,ATG5,LPCAT3,MAP1LC3A,MAP1LC3B,MAP1LC3C
Retrograde endocannabinoid signaling	6	55	1.6	DAGLA,DAGLB,MAPK10,MAPK8,MAPK9,MGLL
Pancreatic secretion	16	30	1.55	CEL,PLA2G10,PLA2G12A,PLA2G12B,PLA2G1B,PLA2G2A,PLA2G2C,PLA2G2D,PLA2G2E,PLA2G2F,PLA2G3,PLA2G5,PNLIP,PNLIPRP1,PNLIPRP2,RAC1
Kaposi sarcoma-associated herpesvirus infection	10	75	1.54	BECN1,GABARAP,GABARAPL1,GABARAPL2,IKBKB,MAPK10,MAPK8,MAPK9,PIK3C3,RAC1
Proteoglycans in cancer	12	85	1.53	CDC42,CTTN,FASLG,GPC1,GPC3,HSPG2,RAC1,SDC1,SDC2,SDC4,TLR4,TNF
Fatty acid degradation	12	20	1.53	ACSBG1,ACSBG2,ACSL1,ACSL3,ACSL4,ACSL5,ACSL6,ALDH1B1,ALDH2,ALDH3A2,ALDH7A1,ALDH9A1
Salmonella infection	40	99	1.52	ACTR10,ACTR1A,ACTR2,ACTR3,ARPC1A,ARPC2,ARPC3,ARPC4,ARPC5,CDC42,DCTN1,DCTN2,DCTN3,DCTN4,DCTN5,DCTN6,DNM2,DYNC1H1,DYNC1I1,DYNC1I2,DYNC1LI1,DYNC1LI2,DYNLL1,DYNLL2,IKBKB,MAPK10,MAPK8,MAPK9,PIK3C2A,PIK3C3,RAB5A,RAB5B,RAB5C,RAC1,SNX18,SNX9,TLR4,TLR6,TNF,WASL
Parathyroid hormone synthesis, secretion and action	2	31	1.52	PLD1,PLD2
Leishmaniasis	2	32	1.5	TLR4,TNF
Epstein-Barr virus infection	6	53	1.46	IKBKB,MAPK10,MAPK8,MAPK9,RAC1,TNF
Vitamin digestion and absorption	6	7	1.41	APOA1,APOA4,APOB,PLB1,PNLIP,SCARB1
Human T-cell leukemia virus 1 infection	5	48	1.41	IKBKB,MAPK10,MAPK8,MAPK9,TNF
Arginine and proline metabolism	5	5	1.38	ALDH1B1,ALDH2,ALDH3A2,ALDH7A1,ALDH9A1
Glycolysis / Gluconeogenesis	5	5	1.38	ALDH1B1,ALDH2,ALDH3A2,ALDH7A1,ALDH9A1
Histidine metabolism	5	5	1.38	ALDH1B1,ALDH2,ALDH3A2,ALDH7A1,ALDH9A1
Protein processing in endoplasmic reticulum	8	11	1.37	EIF2AK3,ERN1,HSPA8,MAPK10,MAPK8,MAPK9,P4HB,SAR1B
Progesterone-mediated oocyte maturation	3	35	1.36	MAPK10,MAPK8,MAPK9
Amyotrophic lateral sclerosis	21	45	1.35	ACTR10,ACTR1A,BECN1,CHMP2B,DCTN1,DCTN2,DCTN3,DCTN4,DCTN5,DCTN6,EIF2AK3,ERN1,GABARAP,GABARAPL1,GABARAPL2,PIK3C3,PIK3R4,RAB5A,RAC1,TNF,WIPI2
HCC vs. LC
Ether lipid metabolism	30	47	10.32	ENPP6,GDPD1,GDPD3,JMJD7-PLA2G4B,LPCAT1,LPCAT2,LPCAT4,PAFAH1B1,PAFAH1B2,PAFAH1B3,PLA2G10,PLA2G12A,PLA2G12B,PLA2G1B,PLA2G2A,PLA2G2C,PLA2G2D,PLA2G2E,PLA2G2F,PLA2G3,PLA2G4A,PLA2G4B,PLA2G4C,PLA2G4D,PLA2G4E,PLA2G4F,PLA2G5,PLA2G6,PLAAT3,PLB1
alpha-Linolenic acid metabolism	21	21	9.72	JMJD7-PLA2G4B,PLA2G10,PLA2G12A,PLA2G12B,PLA2G1B,PLA2G2A,PLA2G2C,PLA2G2D,PLA2G2E,PLA2G2F,PLA2G3,PLA2G4A,PLA2G4B,PLA2G4C,PLA2G4D,PLA2G4E,PLA2G4F,PLA2G5,PLA2G6,PLAAT3,PLB1
Arachidonic acid metabolism	21	21	9.72	JMJD7-PLA2G4B,PLA2G10,PLA2G12A,PLA2G12B,PLA2G1B,PLA2G2A,PLA2G2C,PLA2G2D,PLA2G2E,PLA2G2F,PLA2G3,PLA2G4A,PLA2G4B,PLA2G4C,PLA2G4D,PLA2G4E,PLA2G4F,PLA2G5,PLA2G6,PLAAT3,PLB1
Linoleic acid metabolism	21	21	9.72	JMJD7-PLA2G4B,PLA2G10,PLA2G12A,PLA2G12B,PLA2G1B,PLA2G2A,PLA2G2C,PLA2G2D,PLA2G2E,PLA2G2F,PLA2G3,PLA2G4A,PLA2G4B,PLA2G4C,PLA2G4D,PLA2G4E,PLA2G4F,PLA2G5,PLA2G6,PLAAT3,PLB1
Glycerophospholipid metabolism	34	82	7.82	AGPAT3,JMJD7-PLA2G4B,LCAT,LPCAT1,LPCAT2,LPCAT3,LPCAT4,LYPLA1,LYPLA2,MBOAT2,PLA2G10,PLA2G12A,PLA2G12B,PLA2G15,PLA2G1B,PLA2G2A,PLA2G2C,PLA2G2D,PLA2G2E,PLA2G2F,PLA2G3,PLA2G4A,PLA2G4B,PLA2G4C,PLA2G4D,PLA2G4E,PLA2G4F,PLA2G5,PLA2G6,PLAAT3,PLB1,PNPLA6,PNPLA7,TAZ
Fat digestion and absorption	22	35	7.52	APOA1,APOB,CD36,CEL,FABP1,FABP2,LIPF,PLA2G10,PLA2G12A,PLA2G12B,PLA2G1B,PLA2G2A,PLA2G2C,PLA2G2D,PLA2G2E,PLA2G2F,PLA2G3,PLA2G5,PNLIP,PNLIPRP1,PNLIPRP2,SCARB1
Pancreatic secretion	16	30	4.88	CEL,PLA2G10,PLA2G12A,PLA2G12B,PLA2G1B,PLA2G2A,PLA2G2C,PLA2G2D,PLA2G2E,PLA2G2F,PLA2G3,PLA2G5,PNLIP,PNLIPRP1,PNLIPRP2,RAC1
PI3K-Akt signaling pathway	4	157	4.3	FASLG,IKBKB,RAC1,TLR4
Vascular smooth muscle contraction	19	49	4.16	JMJD7-PLA2G4B,PLA2G10,PLA2G12A,PLA2G12B,PLA2G1B,PLA2G2A,PLA2G2C,PLA2G2D,PLA2G2E,PLA2G2F,PLA2G3,PLA2G4A,PLA2G4B,PLA2G4C,PLA2G4D,PLA2G4E,PLA2G4F,PLA2G5,PLA2G6
Fatty acid degradation	12	20	4.13	ACSBG1,ACSBG2,ACSL1,ACSL3,ACSL4,ACSL5,ACSL6,ALDH1B1,ALDH2,ALDH3A2,ALDH7A1,ALDH9A1
PPAR signaling pathway	15	32	4.1	ACSBG1,ACSBG2,ACSL1,ACSL3,ACSL4,ACSL5,ACSL6,APOA1,CD36,FABP1,FABP2,FABP4,LPL,PPARA,UCP1
Adipocytokine signaling pathway	14	28	4.09	ACSBG1,ACSBG2,ACSL1,ACSL3,ACSL4,ACSL5,ACSL6,CD36,IKBKB,MAPK10,MAPK8,MAPK9,PPARA,TNF
Vasopressin-regulated water reabsorption	12	22	3.84	DCTN1,DCTN2,DCTN4,DCTN5,DCTN6,DYNC1H1,DYNC1I1,DYNC1I2,DYNC1LI1,DYNC1LI2,DYNLL1,DYNLL2
Glycerolipid metabolism	19	54	3.7	AGPAT3,ALDH1B1,ALDH2,ALDH3A2,ALDH7A1,ALDH9A1,CEL,LIPC,LIPF,LIPG,LPL,MBOAT2,MGLL,PNLIP,PNLIPRP1,PNLIPRP2,PNLIPRP3,PNPLA2,PNPLA3
Regulation of actin cytoskeleton	2	109	3.6	CDC42,RAC1
Necroptosis	13	29	3.46	FASLG,JMJD7-PLA2G4B,MAPK10,MAPK8,MAPK9,PLA2G4A,PLA2G4B,PLA2G4C,PLA2G4D,PLA2G4E,PLA2G4F,TLR4,TNF
Rap1 signaling pathway	2	105	3.42	CDC42,RAC1
Non-alcoholic fatty liver disease	11	24	3.06	CDC42,EIF2AK3,ERN1,FASLG,IKBKB,MAPK10,MAPK8,MAPK9,PPARA,RAC1,TNF
Metabolic pathways	56	290	3.03	ACSBG1,ACSBG2,ACSL1,ACSL3,ACSL4,ACSL5,ACSL6,AGPAT3,ALDH1B1,ALDH2,ALDH3A2,ALDH7A1,ALDH9A1,CEL,GALNT1,GALNT2,JMJD7-PLA2G4B,LIPC,LIPF,LIPG,LPCAT1,LPCAT2,LPCAT4,MBOAT2,MGLL,PAFAH1B1,PAFAH1B2,PAFAH1B3,PLA2G10,PLA2G12A,PLA2G12B,PLA2G1B,PLA2G2A,PLA2G2C,PLA2G2D,PLA2G2E,PLA2G2F,PLA2G3,PLA2G4A,PLA2G4B,PLA2G4C,PLA2G4D,PLA2G4E,PLA2G4F,PLA2G5,PLA2G6,PLAAT3,PLB1,PNLIP,PNLIPRP1,PNLIPRP2,PNLIPRP3,PNPLA2,PNPLA3,P…
Pathways in cancer	7	156	2.66	CDC42,FASLG,IKBKB,MAPK10,MAPK8,MAPK9,RAC1
Ovarian steroidogenesis	8	15	2.66	JMJD7-PLA2G4B,PLA2G4A,PLA2G4B,PLA2G4C,PLA2G4D,PLA2G4E,PLA2G4F,SCARB1
Arginine and proline metabolism	5	5	2.6	ALDH1B1,ALDH2,ALDH3A2,ALDH7A1,ALDH9A1
Glycolysis / Gluconeogenesis	5	5	2.6	ALDH1B1,ALDH2,ALDH3A2,ALDH7A1,ALDH9A1
Histidine metabolism	5	5	2.6	ALDH1B1,ALDH2,ALDH3A2,ALDH7A1,ALDH9A1
Salmonella infection	24	99	2.4	ACTR10,ACTR1A,CDC42,DCTN1,DCTN2,DCTN3,DCTN4,DCTN5,DCTN6,DYNC1H1,DYNC1I1,DYNC1I2,DYNC1LI1,DYNC1LI2,DYNLL1,DYNLL2,IKBKB,MAPK10,MAPK8,MAPK9,RAC1,TLR4,TLR6,TNF
Ascorbate and aldarate metabolism	5	6	2.38	ALDH1B1,ALDH2,ALDH3A2,ALDH7A1,ALDH9A1
Pyruvate metabolism	5	6	2.38	ALDH1B1,ALDH2,ALDH3A2,ALDH7A1,ALDH9A1
Fatty acid biosynthesis	7	14	2.26	ACSBG1,ACSBG2,ACSL1,ACSL3,ACSL4,ACSL5,ACSL6
beta-Alanine metabolism	5	7	2.18	ALDH1B1,ALDH2,ALDH3A2,ALDH7A1,ALDH9A1
Vitamin digestion and absorption	5	7	2.18	APOA1,APOB,PLB1,PNLIP,SCARB1
Chemokine signaling pathway	3	88	2.02	CDC42,IKBKB,RAC1
Lysine degradation	5	8	2.01	ALDH1B1,ALDH2,ALDH3A2,ALDH7A1,ALDH9A1
Tryptophan metabolism	5	8	2.01	ALDH1B1,ALDH2,ALDH3A2,ALDH7A1,ALDH9A1
Huntington disease	13	46	1.97	ACTR10,ACTR1A,DCTN1,DCTN2,DCTN3,DCTN4,DCTN5,DCTN6,ERN1,MAPK10,MAPK8,MAPK9,UCP1
Phagosome	13	46	1.97	CD36,COLEC12,DYNC1H1,DYNC1I1,DYNC1I2,DYNC1LI1,DYNC1LI2,MSR1,PLA2R1,RAC1,SCARB1,TLR4,TLR6
Endocytosis	5	111	1.88	CAPZA1,CAPZA2,CAPZA3,CAPZB,CDC42
Ferroptosis	6	14	1.76	ACSL1,ACSL3,ACSL4,ACSL5,ACSL6,LPCAT3
Protein processing in endoplasmic reticulum	5	11	1.6	EIF2AK3,ERN1,MAPK10,MAPK8,MAPK9
Valine, leucine and isoleucine degradation	5	11	1.6	ALDH1B1,ALDH2,ALDH3A2,ALDH7A1,ALDH9A1
Amyotrophic lateral sclerosis	12	45	1.55	ACTR10,ACTR1A,DCTN1,DCTN2,DCTN3,DCTN4,DCTN5,DCTN6,EIF2AK3,ERN1,RAC1,TNF
Cholesterol metabolism	9	29	1.52	APOA1,APOB,CD36,LCAT,LIPA,LIPC,LIPG,LPL,SCARB1
Ras signaling pathway	27	142	1.42	CDC42,FASLG,IKBKB,JMJD7-PLA2G4B,MAPK10,MAPK8,MAPK9,PLA2G10,PLA2G12A,PLA2G12B,PLA2G1B,PLA2G2A,PLA2G2C,PLA2G2D,PLA2G2E,PLA2G2F,PLA2G3,PLA2G4A,PLA2G4B,PLA2G4C,PLA2G4D,PLA2G4E,PLA2G4F,PLA2G5,PLA2G6,PLAAT3,RAC1
Inflammatory mediator regulation of TRP channels	11	41	1.41	JMJD7-PLA2G4B,MAPK10,MAPK8,MAPK9,PLA2G4A,PLA2G4B,PLA2G4C,PLA2G4D,PLA2G4E,PLA2G4F,PLA2G6
GnRH signaling pathway	11	42	1.39	CDC42,JMJD7-PLA2G4B,MAPK10,MAPK8,MAPK9,PLA2G4A,PLA2G4B,PLA2G4C,PLA2G4D,PLA2G4E,PLA2G4F
Peroxisome	5	13	1.39	ACSL1,ACSL3,ACSL4,ACSL5,ACSL6

## Sheet: Table S9
Table S9. Bioinformatics of potential hub genes in hepatocellular carcinoma
Sources	Comparison	Gene	Oncopression (mRNA)	Gepia mRNA (logFC >0.585, p<0.05)	IHC	TPA KM plot	KM plot	Gepia KM plot		0	No
Gene-metabolite interaction network	HCC vs. LC	LDHA	0	0	0	1	1	1		1	up	unfavourable
Gene-metabolite interaction network	HCC vs. LC	EEF1E1	1	1	1	1	1	1		2	down	favorable
Gene-metabolite interaction network	HCC vs. LC	CAT	2	0	2	2	2	2		N/A	Not available
Gene-metabolite interaction network	HCC vs. LC	LAP3	2	0	2	0	0	0
Gene-metabolite interaction network	HCC vs. LC	ADK	2	0	2	2	2	2
Gene-metabolite interaction network	HCC vs. LC	GSTP1	0	0	0	0	0	0
Gene-metabolite interaction network	HCC vs. LC	BAX	1	1	1	1	0	1
Gene-metabolite interaction network	HCC vs. LC	HPRT1	0	1	0	0	0	1
Gene-metabolite interaction network	HCC vs. LC	UNG	1	1	1	1	0	0
Gene-metabolite interaction network	HCC vs. Control	ASS1	2	2	2	0	0	0
Gene-metabolite interaction network	HCC vs. Control	ALDH7A1	2	1	0	0	2	2
Gene-metabolite interaction network	HCC vs. Control	HBB	0	2	0	0	0	0
Gene-metabolite interaction network	HCC vs. Control	ARG2	1	1	0	0	0	0
Gene-metabolite interaction network	HCC vs. Control	TH	1	0	0	0	2	0
Gene-metabolite interaction network	HCC vs. Control	CA2	2	2	0	0	0	0
Gene-metabolite interaction network	HCC vs. Control	PRTFDC1	1	1	0	0	0	1
Gene-metabolite interaction network	HCC vs. Control	ABCC4	1	1	0	0	0	1
Lipid-related gene network	HCC vs. Control	ACSBG1	1	0	0	0	2	0
Lipid-related gene network	HCC vs. Control	ALDH7A1	2	1	0	0	2	1
Lipid-related gene network	HCC vs. Control	CTTN	1	0	0	1	0	1
Lipid-related gene network	HCC vs. Control	DAB2	0	1	1	1	1	1
Lipid-related gene network	HCC vs. Control	DNM3	1	0	0	0	2	0
Lipid-related gene network	HCC vs. Control	FGR	2	2	0	0	0	0
Lipid-related gene network	HCC vs. Control	LPCAT1	1	1	1	1	1	1
Lipid-related gene network	HCC vs. Control	LPCAT3	2	0	0	0	0	0
Lipid-related gene network	HCC vs. Control	LPCAT4	1	0	0	1	1	1
Lipid-related gene network	HCC vs. Control	PISD	1	0	2	0	0	1
Lipid-related gene network	HCC vs. Control	PLA2G12A	2	0	0	0	2	0
Lipid-related gene network	HCC vs. Control	RAC1	1	1	1	1	0	1
Lipid-related gene network	HCC vs. LC	ACSL1	2	2	0	0	0	0
Lipid-related gene network	HCC vs. LC	ACTR10	1	0	N/A	1	0	1
HCC: Hepatocellular carcinoma, LC: liver cirrhosis, IHC: Immunohistochemmistry, TPA: the protein Atlas, KM: Kaplan-Meier
